# Supplementary material for: Electrooxidative palladium- and enantioselective rhodium-catalyzed [3 + 2] spiroannulations
Source: Royal Society of Chemistry journal article supplement (doi:10.1039/d1sc07124f), 2022-01-01

Supporting Information

**Electrooxidative Palladium- and Enantioselective Rhodium-Catalyzed [3+2]  
Spiroannulations**

Wen Wei, Alexej Scheremetjew, Lutz Ackermann<sup>\*</sup>  
Institut für Organische und Biomolekulare Chemie, Georg-August-Universität  
Tammannstraße 2, 37077 Göttingen, Germany  
Fax: +49/ 551-39-6777

Email: [Lutz.Ackermann@chemie.uni-goettingen.de](mailto:Lutz.Ackermann@chemie.uni-goettingen.de)

## Table of Contents

|                                                                                                       |            |
|-------------------------------------------------------------------------------------------------------|------------|
| <b>General Remarks</b>                                                                                | <b>S3</b>  |
| <b>Optimization of the Reaction Conditions</b>                                                        | <b>S4</b>  |
| <b>General procedures</b>                                                                             | <b>S7</b>  |
| <b>Characterization Data of Products</b>                                                              | <b>S9</b>  |
| <b>Mechanistic Studies</b>                                                                            | <b>S40</b> |
| <b>References</b>                                                                                     | <b>S47</b> |
| <b><math>^1\text{H}</math>, <math>^{13}\text{C}</math> and <math>^{19}\text{F}</math> NMR Spectra</b> | <b>S48</b> |

## General Remarks

Catalytic reactions were carried out in undivided electrochemical cells (10 mL) using pre-dried glassware, unless otherwise stated.

1-aryl-naphthalenol were synthesized according to previously described methods.<sup>1</sup> Other chemicals were obtained from commercial sources and used without further purification. Platinum electrodes (10 mm × 15 mm × 0.25 mm, 99.9%; obtained from ChemPur® Karlsruhe, Germany) and graphite felt (GF) electrodes (10 mm × 15 mm × 6 mm, SIGRACELL® GFA 6 EA, obtained from SGL Carbon, Wiesbaden, Germany) were connected using stainless steel adapters. Electrocatalysis was conducted using an AXIOMET AX-3003P potentiostat in constant current mode.

Yields refer to isolated compounds, estimated to be >98% pure as determined by <sup>1</sup>H NMR. Flash chromatography: Merck silica gel 60 (40–63 µm). NMR: Spectra were recorded on Varian Mercury Vx 300, Varian VNMRs 300, Varian Inova 500, Varian Inova 600, Bruker Avance III 400, Bruker Avance III HD 400 and Bruker Avance III HD 500 instruments in the solvent indicated; chemical shifts (δ) are provided in ppm. IR spectra were recorded on a Bruker FT-IR alpha-P device. EI-MS was recorded on Joel AccuTof at 70 eV. ESI-MS was recorded on Bruker Daltonic micrOTOF. High resolution mass spectrometry (HR-MS) was recorded on micrOTOF, Bruker Daltonic. Melting points (m.p.) were measured on Stuart® melting point apparatus SMP3, Barloworld Scientific, values are uncorrected.

## Optimization of the Reaction Conditions

**Table S1.** Optimization of the electrocatalytic dearomative spiroannulation.<sup>[a]</sup>

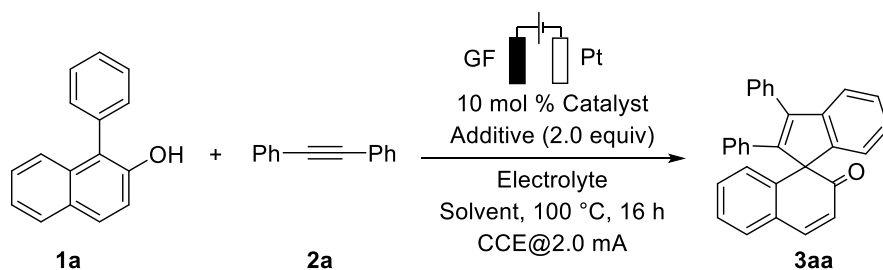

| Entry | Catalyst                                             | Electrolyte                    | Additive                        | Solvent                         | Current (mA) | Yield (%) |
|-------|------------------------------------------------------|--------------------------------|---------------------------------|---------------------------------|--------------|-----------|
| 1     | [RuCl <sub>2</sub> ( <i>p</i> -cymene)] <sub>2</sub> | ---                            | ---                             | DMA                             | 2.0          | Trace     |
| 2     | [RuCl <sub>2</sub> ( <i>p</i> -cymene)] <sub>2</sub> | <i>n</i> -Bu <sub>4</sub> NOAc | K <sub>2</sub> CO <sub>3</sub>  | DMA                             | 2.0          | Trace     |
| 3     | [RuCl <sub>2</sub> ( <i>p</i> -cymene)] <sub>2</sub> | <i>n</i> -Bu <sub>4</sub> NOAc | K <sub>2</sub> CO <sub>3</sub>  | DMF                             | 4.0          | Trace     |
| 4     | [RuCl <sub>2</sub> ( <i>p</i> -cymene)] <sub>2</sub> | ---                            | KPF <sub>6</sub>                | DMF                             | 4.0          | Trace     |
| 5     | [RuCl <sub>2</sub> ( <i>p</i> -cymene)] <sub>2</sub> | ---                            | (1Ad)CO <sub>2</sub> H          | <i>t</i> -AmOH/H <sub>2</sub> O | 4.0          | Trace     |
| 6     | [RuCl <sub>2</sub> ( <i>p</i> -cymene)] <sub>2</sub> | ---                            | KOAc                            | <i>t</i> -AmOH/H <sub>2</sub> O | 4.0          | Trace     |
| 7     | [RuCl <sub>2</sub> ( <i>p</i> -cymene)] <sub>2</sub> | ---                            | K <sub>2</sub> HPO <sub>4</sub> | <i>m</i> -Xylene                | 4.0          | Trace     |
| 8     | [RuCl <sub>2</sub> ( <i>p</i> -cymene)] <sub>2</sub> | <i>n</i> -Bu <sub>4</sub> NOAc | K <sub>2</sub> CO <sub>3</sub>  | dioxane/H <sub>2</sub> O        | 2.0          | Trace     |
| 9     | [Ru(OAc) <sub>2</sub> ( <i>p</i> -cymene)]           | <i>n</i> -Bu <sub>4</sub> NOAc | ---                             | DMF                             | 2.0          | Trace     |
| 10    | [Ru(OAc) <sub>2</sub> ( <i>p</i> -cymene)]           | <i>n</i> -Bu <sub>4</sub> NOAc | Piv-Val-OH                      | DMF                             | 2.0          | Trace     |
| 11    | [Ru(OAc) <sub>2</sub> ( <i>p</i> -cymene)]           | <i>n</i> -Bu <sub>4</sub> NOAc | ---                             | <i>t</i> -AmOH                  | 2.0          | Trace     |
| 12    | [Ru(OAc) <sub>2</sub> ( <i>p</i> -cymene)]           | <i>n</i> -Bu <sub>4</sub> NOAc | K <sub>2</sub> CO <sub>3</sub>  | dioxane                         | 4.0          | Trace     |
| 13    | RuCl <sub>3</sub> ·3H <sub>2</sub> O                 | <i>n</i> -Bu <sub>4</sub> NOAc | K <sub>2</sub> CO <sub>3</sub>  | DMF                             | 2.0          | Trace     |

[a] Reaction conditions: **1a** (88.0 mg, 0.40 mmol), **2a** (70.0 mg, 0.40 mmol), catalyst (10 mol %), electrolyte (1.0 equiv), additive (2.0 equiv), solvent (4.0 mL) at 100 °C, 16 h, under air, yield of isolated product.

**Table S2.** Optimization of the electrocatalytic dearomative spiroannulation.<sup>[a]</sup>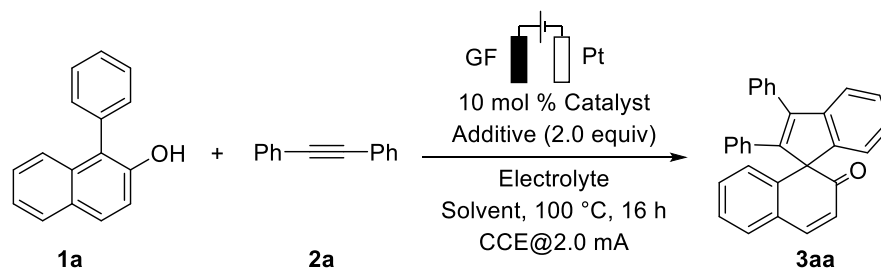

| Entry | Catalyst                                                    | Electrolyte                        | Additive                       | Solvent                         | Current (mA) | Yield (%)               |
|-------|-------------------------------------------------------------|------------------------------------|--------------------------------|---------------------------------|--------------|-------------------------|
| 1     | [RhCp*Cl <sub>2</sub> ] <sub>2</sub>                        | ---                                | KOAc                           | DMF                             | 4.0          | Trace                   |
| 2     | [RhCp*Cl <sub>2</sub> ] <sub>2</sub>                        | <i>n</i> -Bu <sub>4</sub> NOAc     | K <sub>2</sub> CO <sub>3</sub> | <i>t</i> -AmOH/H <sub>2</sub> O | 4.0          | Trace                   |
| 3     | CoBr <sub>2</sub>                                           | <i>n</i> -Bu <sub>4</sub> NOAc     | K <sub>2</sub> CO <sub>3</sub> | DMF                             | 2.0          | Trace                   |
| 4     | Co(OAc) <sub>2</sub>                                        | <i>n</i> -Bu <sub>4</sub> NOAc     | K <sub>2</sub> CO <sub>3</sub> | DMF                             | 2.0          | Trace                   |
| 5     | Cp*Co(CO)I <sub>2</sub>                                     | <i>n</i> -Bu <sub>4</sub> NOAc     | K <sub>2</sub> CO <sub>3</sub> | DMF                             | 2.0          | Trace                   |
| 6     | [Cp*Co(MeCN) <sub>3</sub> ](SbF <sub>6</sub> ) <sub>2</sub> | <i>n</i> -Bu <sub>4</sub> NOAc     | K <sub>2</sub> CO <sub>3</sub> | DMF                             | 2.0          | Trace                   |
| 7     | Pd(OAc) <sub>2</sub>                                        | <i>n</i> -Bu <sub>4</sub> NOAc     | K <sub>2</sub> CO <sub>3</sub> | DMF                             | 2.0          | 25 <sup>[b,c]</sup>     |
| 8     | Pd(OAc) <sub>2</sub>                                        | <i>n</i> -Bu <sub>4</sub> NOAc     | K <sub>2</sub> CO <sub>3</sub> | DMF                             | 4.0          | 64 <sup>[b,d]</sup>     |
| 9     | <b>Pd(OAc)<sub>2</sub></b>                                  | <b><i>n</i>-Bu<sub>4</sub>NOAc</b> | K <sub>2</sub> CO <sub>3</sub> | <b>DMF</b>                      | <b>2.0</b>   | <b>79<sup>[b]</sup></b> |
| 10    | Pd(OAc) <sub>2</sub>                                        | <i>n</i> -Bu <sub>4</sub> NOAc     | ---                            | DMF                             | ---          | 15 <sup>[b,e]</sup>     |

[a] Reaction conditions: **1a** (88.0 mg, 0.40 mmol), **2a** (70.0 mg, 0.40 mmol), catalyst (10 mol %), electrolyte (1.0 equiv), additive (2.0 equiv), solvent (4.0 mL) at 100 °C, 16 h, under air, yield of isolated product. [b] **1a** (0.80 mmol), **2a** (0.40 mmol), [c] Pd(OAc)<sub>2</sub> (5 mol %). [d] 8 h. [e] without current.

**Table S3.** Optimization of electrochemically enabled palladium-catalyzed dearomative spiroannulation.<sup>[a]</sup>

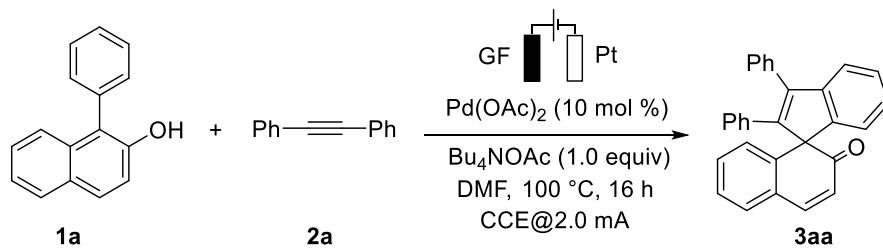

| Entry | Catalyst             | Electrolyte                                 | Solvent                               | Current (mA) | Yield (%)            |
|-------|----------------------|---------------------------------------------|---------------------------------------|--------------|----------------------|
| 1     | Pd(OAc) <sub>2</sub> | ---                                         | DMF                                   | 2.0          | 13 <sup>[b]</sup>    |
| 2     | Pd(OAc) <sub>2</sub> | ---                                         | <i>t</i> -AmOH/H <sub>2</sub> O (3:1) | 4.0          | NR                   |
| 3     | Pd(OAc) <sub>2</sub> | ---                                         | dioxane/H <sub>2</sub> O (3:1)        | 4.0          | Trace                |
| 4     | Pd(OAc) <sub>2</sub> | ---                                         | DMF/H <sub>2</sub> O (3:1)            | 2.0          | Trace                |
| 5     | Pd(OAc) <sub>2</sub> | ---                                         | MeOH/H <sub>2</sub> O (3:1)           | 2.0          | Trace <sup>[b]</sup> |
| 6     | Pd(OAc) <sub>2</sub> | ---                                         | DMSO/H <sub>2</sub> O (3:1)           | 2.0          | Trace                |
| 7     | Pd(OAc) <sub>2</sub> | <i>n</i> -BuNPF <sub>6</sub>                | DMF                                   | 2.0          | 37                   |
| 8     | Pd(OAc) <sub>2</sub> | <i>n</i> -BuNBF <sub>4</sub>                | DMF                                   | 2.0          | 45                   |
| 9     | Pd(OAc) <sub>2</sub> | NMe <sub>4</sub> Cl                         | DMF                                   | 2.0          | 46                   |
| 10    | Pd(OAc) <sub>2</sub> | KCl                                         | DMF                                   | 2.0          | 25                   |
| 11    | Pd(OAc) <sub>2</sub> | <i>n</i> -Bu <sub>4</sub> NI                | DMF                                   | 2.0          | 33                   |
| 12    | Pd(OAc) <sub>2</sub> | Et <sub>4</sub> NCIO <sub>4</sub>           | DMF                                   | 2.0          | 44                   |
| 13    | Pd(OAc) <sub>2</sub> | <i>n</i> -Bu <sub>4</sub> NCIO <sub>4</sub> | DMF                                   | 2.0          | 39                   |
| 14    | Pd(OAc) <sub>2</sub> | <i>n</i> -Bu <sub>4</sub> NOAc              | DMF                                   | 2.0          | 50                   |
| 15    | Pd(OAc) <sub>2</sub> | NMe <sub>4</sub> Cl                         | DMF                                   | 2.0          | 71% <sup>[c]</sup>   |
| 16    | Pd(OAc) <sub>2</sub> | <i>n</i> -Bu <sub>4</sub> NOAc              | DMF                                   | 2.0          | 87% <sup>[c]</sup>   |

[a] Reaction conditions: **1a** (88.0 mg, 0.40 mmol), **2a** (70.0 mg, 0.40 mmol), catalyst (10 mol %), electrolyte (1.0 equiv), solvent (4.0 mL) at 100 °C, 16 h, under air, yield of isolated product. [b] at 60 °C. [c] **1a** (176.0 mg, 0.8 mmol), **2a** (70.0 mg, 0.40 mmol).

## General procedures

### General procedure A : Electrooxidative Palladium-Catalyzed [3+2] Dearomative Spiroannulation.

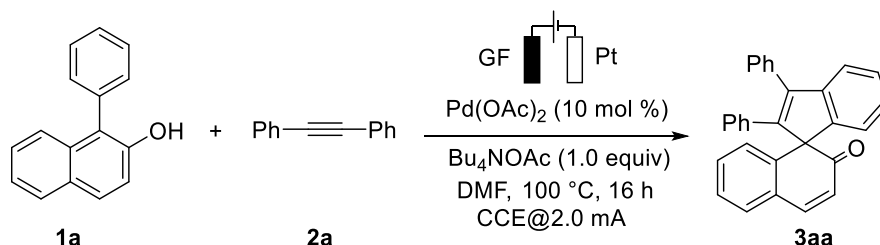

The electrocatalysis was carried out in an undivided cell under air with a graphite felt (GF) anode (10 mm × 15 mm × 6 mm) and a platinum cathode (10 mm × 15 mm × 0.25 mm). 1-Phenylnaphthalen-2-ol (**1a**) (176 mg, 0.80 mmol), 1,2-diphenylethyne (**2a**) (71.0 mg, 0.40 mmol), and *n*-Bu<sub>4</sub>NOAc (0.40 mmol, 1.0 equiv) were dissolved in DMF (4.0 mL). Electrocatalysis was performed at 100 °C with a constant current of 2.0 mA maintained for 16 h. The GF anode was washed with CH<sub>2</sub>Cl<sub>2</sub> (3×10 mL). Evaporation of the solvent and subsequent purification by column chromatography on silica gel with Ethyl acetate/*n*-hexane (1/5) afforded the corresponding products **3aa**.

### General procedure B : Electrooxidative Rhodium-Catalyzed [3+2] Dearomative Spiroannulation.

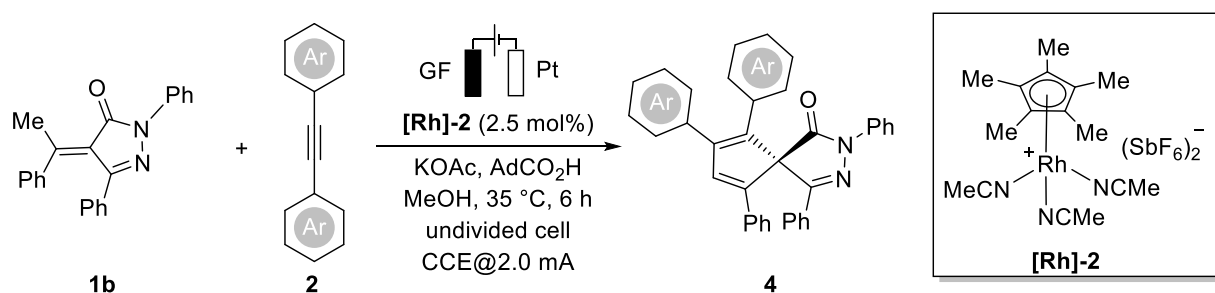

The electrocatalysis was carried out in an undivided cell under air with a graphite felt (GF) anode (10 mm × 15 mm × 6 mm) and a platinum cathode (10 mm × 15 mm × 0.25 mm). 2,5-diphenyl-4-(1-phenylethylidene)-2,4-dihydro-3H-pyrazol-3-one (**1b**) (51 mg, 0.15 mmol), 1,2-diphenylethyne (**2a**) (18.0 mg, 0.10 mmol), **[Rh]-2** (0.0025 mmol, 2.5 mol %), KOAc (0.20 mmol, 2.0 equiv) and AdCOOH (0.01 mmol, 10 mol %) were dissolved in MeOH (4.0 mL). Electrocatalysis was

performed at 35 °C with a constant current of 2.0 mA maintained for 6 h. The GF anode was washed with CH<sub>2</sub>Cl<sub>2</sub> (3×10 mL). Evaporation of the solvent and subsequent purification by column chromatography on silica gel with Ethyl acetate/*n*-hexane (1/10) afforded the corresponding products **4**.

**General procedure C : Electrooxidative Rhodium-Catalyzed [3+2] Dearomative Spiroannulation.**

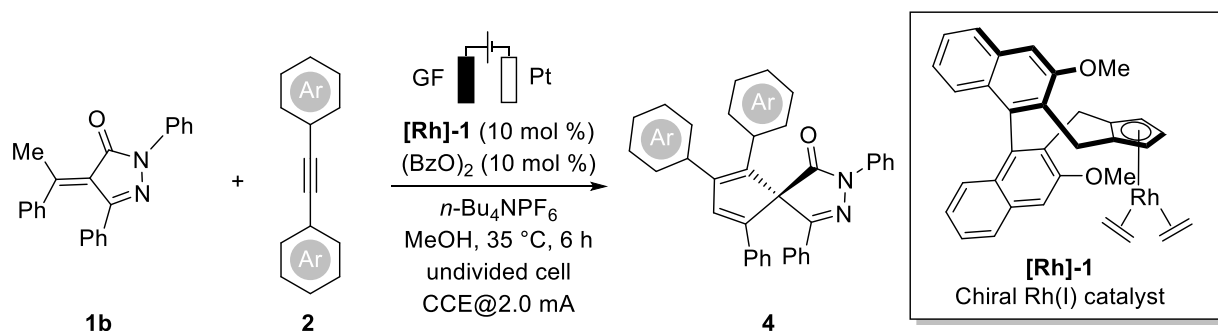

The electrocatalysis was carried out in an undivided cell under air with a graphite felt (GF) anode (10 mm × 15 mm × 6 mm) and a platinum cathode (10 mm × 15 mm × 0.25 mm). **[Rh]-1** (0.01 mmol, 10 mol%), (BzO)<sub>2</sub> (10 mol%) were dissolved in MeOH (4.0 mL) and the mixture were stirred at 35 °C for half an hour. 2,5-diphenyl-4-(1-phenylethylidene)-2,4-dihydro-3H-pyrazol-3-one (**1b**) (51 mg, 0.15 mmol), 1,2-diphenylethyne (**2a**) (18.0 mg, 0.10 mmol), *n*-Bu<sub>4</sub>NPF<sub>6</sub> (0.30 mmol, 3.0 equiv) were dissolved in the solvent. Electrocatalysis was performed at 35 °C with a constant current of 2.0 mA maintained for 6 h. The GF anode was washed with CH<sub>2</sub>Cl<sub>2</sub> (3×10 mL). Evaporation of the solvent and subsequent purification by column chromatography on silica gel with Ethyl acetate/*n*-hexane (1/10) afforded the corresponding products **4**.

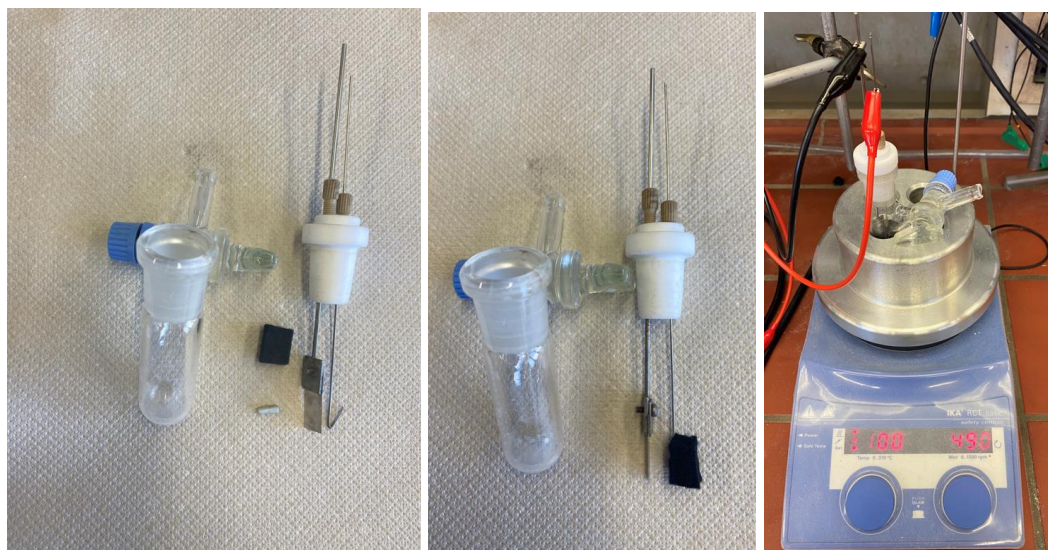



## Characterization Data of Products

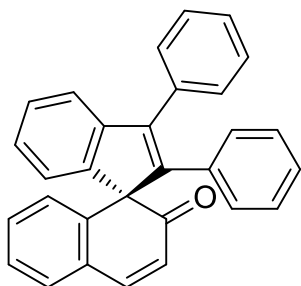

### 2,3-Diphenyl-2'*H*-spiro[indene-1,1'-naphthalen]-2'-one (**3aa**)

The general procedure **A** was followed using 1-phenylnaphthalen-2-ol (**1a**) (176 mg, 0.80 mmol) and 1,2-diphenylethyne (**2a**) (71.0 mg, 0.40 mmol). Purification by column chromatography (*n*-hexane/EtOAc = 10:1) yielded **3aa** (138 mg, 87%), as a white solid.

**<sup>1</sup>H NMR** (400 MHz, CDCl<sub>3</sub>):  $\delta$  = 7.69 (d, *J* = 9.9 Hz, 1H), 7.58 (d, *J* = 7.5 Hz, 2H), 7.50 – 7.40 (m, 4H), 7.33 (d, *J* = 7.7 Hz, 1H), 7.27 (q, *J* = 7.3 Hz, 2H), 7.18 (t, *J* = 7.6 Hz, 1H), 7.09 (t, *J* = 7.3 Hz, 1H), 7.06 – 6.98 (m, 5H), 6.94 – 6.87 (m, 2H), 6.43 (d, *J* = 9.9 Hz, 1H).

**<sup>13</sup>C NMR** (101 MHz, CDCl<sub>3</sub>):  $\delta$  = 196.6 (C<sub>q</sub>), 147.6 (C<sub>q</sub>), 146.1 (CH), 145.4 (C<sub>q</sub>), 145.0 (C<sub>q</sub>), 144.6 (C<sub>q</sub>), 141.0 (C<sub>q</sub>), 135.1 (C<sub>q</sub>), 134.3 (C<sub>q</sub>), 130.6 (CH), 129.9 (CH), 129.6 (C<sub>q</sub>), 129.4 (CH), 129.0 (CH), 128.8 (CH), 127.9 (CH), 127.8 (CH), 127.7 (CH), 127.5 (CH), 127.0 (CH), 126.8 (CH), 126.5 (CH), 126.3 (CH), 121.8 (CH), 121.6 (CH), 71.7 (C<sub>q</sub>).

**IR** (ATR):  $\tilde{\nu}$  = 3050, 1711, 1664, 1441, 1360, 1219, 1029, 759, 742, 702 cm<sup>-1</sup>.

**MS** (ESI) *m/z* (relative intensity): 397 (100) [M+H]<sup>+</sup>, 419 (60) [M+Na]<sup>+</sup>.

**HR-MS** (ESI): *m/z* calcd for C<sub>30</sub>H<sub>21</sub>O<sup>+</sup> [M+H]<sup>+</sup>: 397.1592, found: 397.1587.

The analytical data are in accordance with those reported in the literature.<sup>2</sup>

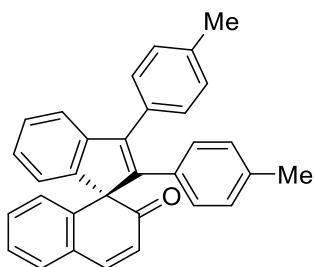

### 2,3-Di-*p*-tolyl-2'*H*-spiro[indene-1,1'-naphthalen]-2'-one (**3ab**)

The general procedure **A** was followed using 1-phenylnaphthalen-2-ol (**1a**) (176 mg, 0.80 mmol)

and 1,2-di-*p*-tolylethyne (82.0 mg, 0.40 mmol). Purification by column chromatography (*n*-hexane/EtOAc = 10:1) yielded **3ab** (144 mg, 85%), as a white solid.

**<sup>1</sup>H NMR** (400 MHz, CDCl<sub>3</sub>): δ = 7.68 (d, *J* = 9.9 Hz, 1H), 7.44 (dd, *J* = 7.7, 5.9 Hz, 3H), 7.27 (dd, *J* = 7.2, 3.1 Hz, 4H), 7.25 – 7.22 (m, 1H), 7.16 (t, *J* = 7.6 Hz, 1H), 7.05 – 6.95 (m, 3H), 6.85 – 6.74 (m, 4H), 6.41 (d, *J* = 9.9 Hz, 1H), 2.44 (s, 3H), 2.16 (s, 3H).

**<sup>13</sup>C NMR** (101 MHz, CDCl<sub>3</sub>): δ = 196.8 (C<sub>q</sub>), 147.5 (C<sub>q</sub>), 146.0 (CH), 145.7 (C<sub>q</sub>), 144.6 (C<sub>q</sub>), 144.0 (C<sub>q</sub>), 141.4 (C<sub>q</sub>), 137.4 (C<sub>q</sub>), 136.6 (C<sub>q</sub>), 132.3 (C<sub>q</sub>), 131.5 (C<sub>q</sub>), 130.6 (CH), 129.8 (CH), 129.6 (C<sub>q</sub>), 129.5 (CH), 129.3 (CH), 128.9 (CH), 128.7 (CH), 127.6 (CH), 127.4 (CH), 126.8 (CH), 126.6 (CH), 126.0 (CH), 121.7 (CH), 121.5 (CH), 71.6 (C<sub>q</sub>), 21.4 (CH<sub>3</sub>), 21.1 (CH<sub>3</sub>).

**IR** (ATR):  $\tilde{\nu}$  = 3003, 1711, 1665, 1360, 1219, 1197, 1020, 815, 761, 745 cm<sup>-1</sup>.

**MS** (ESI) *m/z* (relative intensity): 425 (100) [M+H]<sup>+</sup>, 447 (33) [M+Na]<sup>+</sup>.

**HR-MS** (ESI): *m/z* calcd for C<sub>32</sub>H<sub>25</sub>O<sup>+</sup> [M+H]<sup>+</sup>: 425.1905, found: 425.1900.

The analytical data are in accordance with those reported in the literature.<sup>2</sup>

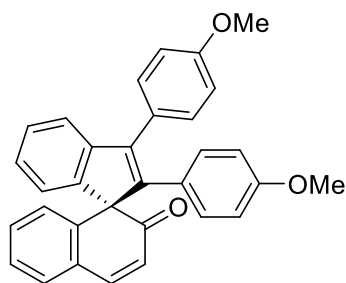

### 2,3-Bis(4-methoxyphenyl)-2'*H*-spiro[indene-1,1'-naphthalen]-2'-one (**3ac**)

The general procedure **A** was followed using 1-phenylnaphthalen-2-ol (**1a**) (176.0 mg, 0.80 mmol) and 1,2-bis(4-methoxyphenyl)ethyne (95.0 mg, 0.40 mmol). Purification by column chromatography (*n*-hexane/EtOAc = 10:1) yielded **3ac** (151 mg, 83%), as a yellow solid.

**<sup>1</sup>H NMR** (400 MHz, CDCl<sub>3</sub>): δ = 7.69 (d, *J* = 10.0 Hz, 1H), 7.50 (d, *J* = 8.5 Hz, 2H), 7.43 (d, *J* = 7.5 Hz, 1H), 7.30 (d, *J* = 7.9 Hz, 2H), 7.28 – 7.21 (m, 1H), 7.16 (td, *J* = 7.6, 1.4 Hz, 1H), 7.07 – 6.95 (m, 5H), 6.84 (d, *J* = 8.8 Hz, 2H), 6.56 (d, *J* = 8.8 Hz, 2H), 6.42 (d, *J* = 9.9 Hz, 1H), 3.88 (s, 3H), 3.65 (s, 3H).

**<sup>13</sup>C NMR** (101 MHz, CDCl<sub>3</sub>): δ = 196.9 (C<sub>q</sub>), 159.1 (C<sub>q</sub>), 158.2 (C<sub>q</sub>), 147.3 (C<sub>q</sub>), 146.1 (CH), 145.7 (C<sub>q</sub>), 144.1 (C<sub>q</sub>), 142.8 (C<sub>q</sub>), 141.4 (C<sub>q</sub>), 130.7 (CH), 130.6 (CH), 130.2 (CH), 129.8 (CH), 129.5 (C<sub>q</sub>), 127.6 (CH), 127.5 (C<sub>q</sub>), 127.4 (CH), 127.0 (C<sub>q</sub>), 126.8 (CH), 126.5 (CH), 125.8 (CH), 121.5 (CH), 121.4 (CH), 114.2 (CH), 113.4 (CH), 71.5 (C<sub>q</sub>), 55.2 (CH<sub>3</sub>), 54.9 (CH<sub>3</sub>).

**IR** (ATR):  $\tilde{\nu}$  = 2836, 1711, 1664, 1502, 1289, 1245, 1173, 1027, 819, 762 cm<sup>-1</sup>.

**MS** (ESI)  $m/z$  (relative intensity): 457 (100)  $[M+H]^+$ , 479 (30)  $[M+Na]^+$ .

**HR-MS** (ESI):  $m/z$  calcd for  $C_{32}H_{25}O_3^+$   $[M+H]^+$ : 457.1804, found: 457.1798.

The analytical data are in accordance with those reported in the literature.<sup>2</sup>

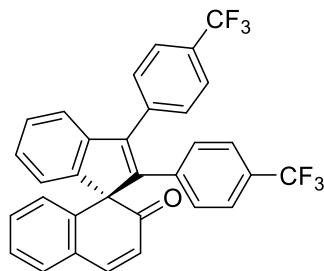

### 2,3-Bis[4-(trifluoromethyl)phenyl]-2'*H*-spiro[indene-1,1'-naphthalen]-2'-one (**3ad**)

The general procedure **A** was followed using 1-phenylnaphthalen-2-ol (**1a**) (176 mg, 0.8 mmol) and 1,2-bis[4-(trifluoromethyl)phenyl]ethyne (126 mg, 0.4 mmol). Purification by column chromatography (*n*-hexane/EtOAc = 10:1) yielded **3ad** (151 mg, 71%), as a as a yellow solid.

**<sup>1</sup>H NMR** (300 MHz,  $CDCl_3$ ):  $\delta$  = 7.78 – 7.69 (m, 3H), 7.66 (d,  $J$  = 8.0 Hz, 2H), 7.48 (d,  $J$  = 7.6 Hz, 1H), 7.35 – 7.24 (m, 5H), 7.21 (t,  $J$  = 7.6 Hz, 1H), 7.14 (dt,  $J$  = 7.4, 3.9 Hz, 1H), 7.06 (d,  $J$  = 7.6 Hz, 1H), 6.94 (d,  $J$  = 8.0 Hz, 3H), 6.42 (d,  $J$  = 10.0 Hz, 1H).

**<sup>13</sup>C NMR** (101 MHz,  $CDCl_3$ ):  $\delta$  = 195.9 ( $C_q$ ), 147.7 ( $C_q$ ), 146.5 (CH), 145.2 ( $C_q$ ), 144.6 ( $C_q$ ), 144.2 ( $C_q$ ), 140.0 ( $C_q$ ), 138.4 ( $C_q$ ), 137.5 ( $C_q$ ), 130.9 (CH), 130.3 (CH), 130.1 (d,  $^2J_{C-F}$  = 32.5 Hz,  $C_q$ ), 129.8 (2 CH), 129.7 ( $C_q$ ), 129.2 (CH), 128.1 (CH), 128.0 (CH), 127.2 (CH), 126.8 (CH), 126.4 (CH), 126.0 (q,  $^3J_{C-F}$  = 23.1 Hz, CH), 125.1 (q,  $^3J_{C-F}$  = 3.8 Hz, CH), 122.6 (d,  $^2J_{C-F}$  = 19.0 Hz,  $C_q$ ), 121.9 (d,  $^4J_{C-F}$  = 1.9 Hz, CH), 71.9 ( $C_q$ ).

**<sup>19</sup>F NMR** (282 MHz,  $CDCl_3$ ):  $\delta$  = -62.64 (d,  $J$  = 75.8 Hz).

**IR** (ATR):  $\tilde{\nu}$  = 3060, 1664, 1615, 1317, 1161, 1106, 1065, 1017, 763, 747  $cm^{-1}$ .

**MS** (ESI)  $m/z$  (relative intensity): 533 (100)  $[M+H]^+$ , 555 (20)  $[M+Na]^+$ .

**HR-MS** (ESI):  $m/z$  calcd for  $C_{32}H_{19}F_6O^+$   $[M+H]^+$ : 533.1340, found: 533.1335.

The analytical data are in accordance with those reported in the literature.<sup>2</sup>

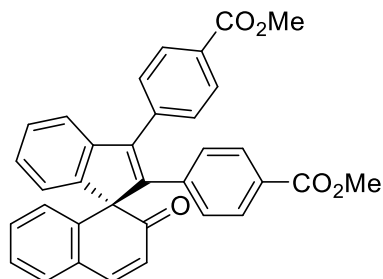

### Dimethyl 4,4'-[2'-oxo-2'*H*-spiro[indene-1,1'-naphthalene]-2,3-diyl]dibenzoate (**3ae**)

The general procedure **A** was followed using 1-phenylnaphthalen-2-ol (**1a**) (176 mg, 0.80 mmol) and dimethyl 4,4'-(ethyne-1,2-diyl)dibenzoate (118.0 mg, 0.40 mmol). Purification by column chromatography (*n*-hexane/EtOAc = 10:1) yielded **3ae** (125 mg, 61%), as a yellow solid.

**<sup>1</sup>H NMR** (400 MHz, CDCl<sub>3</sub>):  $\delta$  = 8.13 (d, *J* = 8.2 Hz, 2H), 7.72 – 7.64 (m, 3H), 7.60 (d, *J* = 8.3 Hz, 2H), 7.44 (dd, *J* = 7.6, 1.4 Hz, 1H), 7.32 – 7.25 (m, 3H), 7.17 (td, *J* = 7.6, 1.4 Hz, 1H), 7.14 – 7.08 (m, 1H), 7.03 (d, *J* = 7.5 Hz, 1H), 6.89 (tt, *J* = 8.6, 1.6 Hz, 3H), 6.40 (d, *J* = 9.9 Hz, 1H), 3.96 (s, 3H), 3.79 (s, *J* = 1.0 Hz, 3H).

**<sup>13</sup>C NMR** (101 MHz, CDCl<sub>3</sub>):  $\delta$  = 196.0 (C<sub>q</sub>), 166.7 (C<sub>q</sub>), 166.5 (C<sub>q</sub>), 147.7 (C<sub>q</sub>), 146.4 (CH), 145.5 (C<sub>q</sub>), 145.1 (C<sub>q</sub>), 144.3 (C<sub>q</sub>), 140.1 (C<sub>q</sub>), 139.5 (C<sub>q</sub>), 138.6 (C<sub>q</sub>), 130.8 (CH), 130.2 (CH), 130.1 (CH), 129.8 (C<sub>q</sub>), 129.6 (C<sub>q</sub>), 129.5 (CH), 129.3 (CH), 128.9 (CH), 128.6 (C<sub>q</sub>), 128.0 (CH), 127.9 (CH), 127.0 (CH), 126.8 (CH), 126.3 (CH), 122.0 (CH), 121.9 (CH), 71.8 (C<sub>q</sub>), 52.2 (CH<sub>3</sub>), 51.9 (CH<sub>3</sub>).

**IR** (ATR):  $\tilde{\nu}$  = 2950, 1709, 1664, 1605, 1434, 1271, 1113, 1018, 747, 709 cm<sup>-1</sup>.

**MS** (ESI) *m/z* (relative intensity): 513 (100) [M+H]<sup>+</sup>, 535 (40) [M+Na]<sup>+</sup>.

**HR-MS** (ESI): *m/z* calcd for C<sub>34</sub>H<sub>25</sub>O<sub>5</sub><sup>+</sup> [M+H]<sup>+</sup>: 513.1702, found: 513.1697

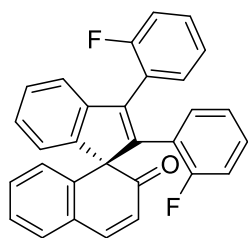

### 2,3-Bis(2-fluorophenyl)-2'*H*-spiro[indene-1,1'-naphthalen]-2'-one (**3af**)

The general procedure **A** was followed using 1-phenylnaphthalen-2-ol (**1a**) (176.0 mg, 0.80 mmol) and 1,2-bis(2-fluorophenyl)ethyne (86.0 mg, 0.40 mmol). Purification by column chromatography (*n*-hexane/EtOAc = 10:1) yielded **3af** (140 mg, 81%), as a yellow solid.

**<sup>1</sup>H NMR** (400 MHz, CDCl<sub>3</sub>):  $\delta$  = 7.56 (d, *J* = 9.9 Hz, 1H), 7.42 – 7.27 (m, 5H), 7.23 (d, *J* = 7.5 Hz, 1H), 7.21 – 7.09 (m, 4H), 7.08 – 6.92 (m, 4H), 6.84 (t, *J* = 7.6 Hz, 1H), 6.75 (dd, *J* = 10.4, 8.3 Hz, 1H), 6.38 (d, *J* = 9.9 Hz, 1H).

**<sup>13</sup>C NMR** (101 MHz, CDCl<sub>3</sub>):  $\delta$  = 196.4 (C<sub>q</sub>), 161.3 (C<sub>q</sub>), 160.7 (C<sub>q</sub>), 158.8 (C<sub>q</sub>), 158.2 (C<sub>q</sub>), 147.8 (C<sub>q</sub>), 146.1 (CH), 141.5 (C<sub>q</sub>), 144.1 (C<sub>q</sub>), 139.5 (C<sub>q</sub>), 130.4 (CH), 130.2 (CH), 130.2 (CH), 129.9 (CH), 129.8 (CH), 129.6 (CH), 129.4 (CH), 129.3 (CH), 127.8 (CH), 127.6 (CH), 127.5 (d, <sup>4</sup>*J*<sub>C-F</sub> =

1.6 Hz, CH), 126.6 (CH), 126.5 (CH), 124.1 (CH), 123.5 (d,  $^3J_{C-F}$  = 3.6 Hz, CH), 122.4 (d,  $^2J_{C-F}$  = 15.7 Hz, C<sub>q</sub>), 121.9 (CH), 115.6 (d,  $^2J_{C-F}$  = 23.1 Hz, CH), 72.7 (C<sub>q</sub>).

**$^{19}\text{F}$  NMR** (376 MHz, CDCl<sub>3</sub>):  $\delta$  = -111.41 (d,  $J$  = 335.4 Hz).

**IR** (ATR):  $\tilde{\nu}$  = 3051, 1711, 1657, 1482, 1452, 1361, 1220, 1102, 755, 744 cm<sup>-1</sup>.

**MS** (ESI)  $m/z$  (relative intensity): 433 (100) [M+H]<sup>+</sup>, 455 (90) [M+Na]<sup>+</sup>.

**HR-MS** (ESI):  $m/z$  calcd for C<sub>30</sub>H<sub>19</sub>F<sub>2</sub>O<sup>+</sup> [M+H]<sup>+</sup>: 433.1404, found: 433.1399.

The analytical data are in accordance with those reported in the literature.<sup>3</sup>

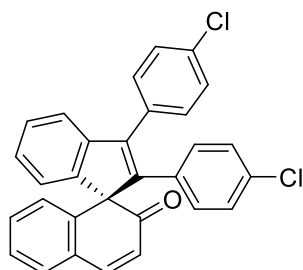

### 2,3-Bis(4-chlorophenyl)-2'*H*-spiro[indene-1,1'-naphthalen]-2'-one (**3ag**)

The general procedure **A** was followed using 1-phenylnaphthalen-2-ol (**1a**) (176.0 mg, 0.80 mmol) and 1,2-bis(4-chlorophenyl)ethyne (98.0 mg, 0.40 mmol). Purification by column chromatography (*n*-hexane/EtOAc = 10:1) yielded **3ag** (148 mg, 80%), as a yellow solid.

**$^1\text{H}$  NMR** (400 MHz, CDCl<sub>3</sub>):  $\delta$  = 7.69 (d,  $J$  = 9.9 Hz, 1H), 7.53 – 7.40 (m, 5H), 7.34 – 7.25 (m, 3H), 7.18 (td,  $J$  = 7.6, 1.3 Hz, 1H), 7.09 (ddd,  $J$  = 8.3, 6.1, 2.4 Hz, 1H), 7.06 – 6.96 (m, 3H), 6.91 (d,  $J$  = 7.8 Hz, 1H), 6.78 (d,  $J$  = 8.5 Hz, 2H), 6.40 (d,  $J$  = 10.0 Hz, 1H).

**$^{13}\text{C}$  NMR** (101 MHz, CDCl<sub>3</sub>):  $\delta$  = 196.3 (C<sub>q</sub>), 147.5 (C<sub>q</sub>), 146.3 (CH), 144.6 (C<sub>q</sub>), 144.4 (C<sub>q</sub>), 144.0 (C<sub>q</sub>), 140.3 (C<sub>q</sub>), 134.0 (C<sub>q</sub>), 133.1 (C<sub>q</sub>), 133.1 (C<sub>q</sub>), 132.6 (C<sub>q</sub>), 130.8 (CH), 130.7 (CH), 130.2 (CH), 130.1 (CH), 129.6 (C<sub>q</sub>), 129.2 (CH), 128.3 (CH), 127.9 (CH), 127.8 (CH), 126.8 (CH), 126.7 (CH), 126.4 (CH), 121.8 (CH), 121.7 (CH), 71.7 (C<sub>q</sub>).

**IR** (ATR):  $\tilde{\nu}$  = 3054, 1712, 1664, 1484, 1394, 1220, 1088, 1014, 818, 746 cm<sup>-1</sup>.

**MS** (ESI)  $m/z$  (relative intensity): 465 (100) [M+H]<sup>+</sup>, 487 (10) [M+Na]<sup>+</sup>.

**HR-MS** (ESI):  $m/z$  calcd for C<sub>30</sub>H<sub>19</sub>Cl<sub>2</sub>O<sup>+</sup> [M+H]<sup>+</sup>: 465.0813, found: 465.0807.

The analytical data are in accordance with those reported in the literature.<sup>2</sup>

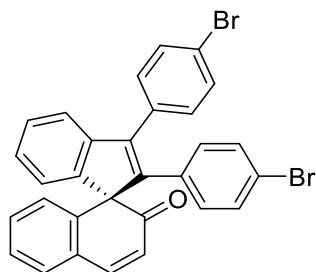

### 2,3-Bis(4-bromophenyl)-2'*H*-spiro[indene-1,1'-naphthalen]-2'-one (**3ah**)

The general procedure **A** was followed using 1-phenylnaphthalen-2-ol (**1a**) (176.0 mg, 0.80 mmol) and 1,2-bis(4-bromophenyl)ethyne (134.0 mg, 0.40 mmol). Purification by column chromatography (*n*-hexane/EtOAc = 10:1) yielded **3ah** (115 mg, 52%), as a yellow solid.

**<sup>1</sup>H NMR** (400 MHz, CDCl<sub>3</sub>):  $\delta$  = 7.68 (d, *J* = 9.9 Hz, 1H), 7.59 (d, *J* = 8.2 Hz, 2H), 7.44 (d, *J* = 7.6 Hz, 1H), 7.39 (d, *J* = 8.2 Hz, 2H), 7.33 – 7.23 (m, 3H), 7.21 – 7.12 (m, 3H), 7.12 – 7.05 (m, 1H), 7.01 (d, *J* = 7.6 Hz, 1H), 6.89 (d, *J* = 7.8 Hz, 1H), 6.69 (d, *J* = 8.4 Hz, 2H), 6.38 (d, *J* = 9.9 Hz, 1H).

**<sup>13</sup>C NMR** (101 MHz, CDCl<sub>3</sub>):  $\delta$  = 196.2 (C<sub>q</sub>), 147.6 (C<sub>q</sub>), 146.3 (CH), 144.5 (C<sub>q</sub>), 144.4 (C<sub>q</sub>), 144.1 (C<sub>q</sub>), 140.3 (C<sub>q</sub>), 133.6 (C<sub>q</sub>), 133.1 (C<sub>q</sub>), 132.2 (CH), 131.3 (CH), 131.1 (CH), 130.8 (CH), 130.5 (CH), 130.1 (CH), 129.7 (C<sub>q</sub>), 127.9 (CH), 127.9 (CH), 126.8 (CH), 126.8 (CH), 126.4 (CH), 122.2 (C<sub>q</sub>), 121.8 (CH), 121.7 (CH), 121.4 (C<sub>q</sub>), 71.7 (C<sub>q</sub>).

**IR** (ATR):  $\tilde{\nu}$  = 3053, 1665, 1481, 1393, 1071, 1010, 816, 762, 746, 734 cm<sup>-1</sup>.

**MS** (ESI) *m/z* (relative intensity): 552 (100) [M+H]<sup>+</sup>.

**HR-MS** (ESI): *m/z* calcd for C<sub>30</sub>H<sub>19</sub>Br<sub>2</sub>O<sup>+</sup> [M+H]<sup>+</sup>: 552.9803, found: 552.9797.

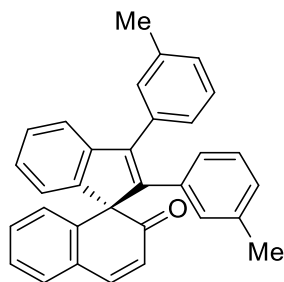

### 2,3-Di-*m*-tolyl-2'*H*-spiro[indene-1,1'-naphthalen]-2'-one (**3ai**)

The general procedure **A** was followed using 1-phenylnaphthalen-2-ol (**1a**) (176.0 mg, 0.80 mmol) and 1,2-di-*m*-tolylethyne (82.0 mg, 0.40 mmol). Purification by column chromatography (*n*-hexane/EtOAc = 10:1) yielded **3ai** (153 mg, 91%), as a white solid.

**<sup>1</sup>H NMR** (400 MHz, CDCl<sub>3</sub>): δ = 7.70 (d, *J* = 9.9 Hz, 1H), 7.48 – 7.34 (m, 4H), 7.33 – 7.22 (m, 4H), 7.18 (td, *J* = 7.5, 1.4 Hz, 1H), 7.10 – 6.97 (m, 4H), 6.95 – 6.82 (m, 2H), 6.74 – 6.63 (m, 2H), 6.44 (d, *J* = 9.9 Hz, 1H), 2.42 (s, 3H), 2.05 (s, 3H).

**<sup>13</sup>C NMR** (101 MHz, CDCl<sub>3</sub>): δ = 196.7 (C<sub>q</sub>), 147.5 (C<sub>q</sub>), 146.0 (CH), 145.6 (C<sub>q</sub>), 144.8 (C<sub>q</sub>), 144.6 (C<sub>q</sub>), 141.3 (C<sub>q</sub>), 138.3 (C<sub>q</sub>), 137.1 (C<sub>q</sub>), 135.2 (C<sub>q</sub>), 134.1 (C<sub>q</sub>), 130.6 (CH), 129.9 (CH), 129.8 (CH), 129.7 (CH), 129.6 (C<sub>q</sub>), 128.6 (CH), 128.5 (CH), 127.7 (CH), 127.7 (CH), 127.6 (CH), 127.4 (CH), 126.8 (CH), 126.5 (CH), 126.5 (CH), 126.2 (CH), 126.1 (CH), 121.8 (CH), 121.5 (CH), 71.6 (C<sub>q</sub>), 21.4 (CH<sub>3</sub>), 21.3 (CH<sub>3</sub>).

**IR** (ATR):  $\tilde{\nu}$  = 2952, 1712, 1664, 1562, 1462, 1360, 1220, 762, 746, 699 cm<sup>-1</sup>.

**MS** (ESI) *m/z* (relative intensity): 425 (100) [M+H]<sup>+</sup>, 447 (50) [M+Na]<sup>+</sup>.

**HR-MS** (ESI): *m/z* calcd for C<sub>32</sub>H<sub>25</sub>O<sup>+</sup> [M+H]<sup>+</sup>: 425.1905, found: 425.1902.

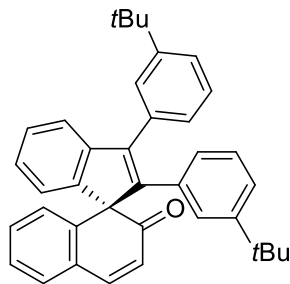

### 2,3-Di-*m*-tolyl-2'*H*-spiro[indene-1,1'-naphthalen]-2'-one (**3aj**)

The general procedure **A** was followed using 1-phenylnaphthalen-2-ol (**1a**) (176.0 mg, 0.80 mmol) and 1,2-bis[3-(*tert*-butyl)phenyl]ethyne (116.0 mg, 0.40 mmol). Purification by column chromatography (*n*-hexane/EtOAc = 10:1) yielded **3aj** (183 mg, 91%), as a white solid.

**<sup>1</sup>H NMR** (400 MHz, CDCl<sub>3</sub>): δ = 7.72 (d, *J* = 9.9 Hz, 1H), 7.56 (d, *J* = 1.5 Hz, 1H), 7.51 – 7.36 (m, 4H), 7.36 – 7.26 (m, 3H), 7.25 – 7.15 (m, 1H), 7.08 (t, *J* = 7.3 Hz, 1H), 7.05 – 7.00 (m, 3H), 6.97 – 6.87 (m, 2H), 6.64 (dd, *J* = 7.8, 1.7 Hz, 1H), 6.45 (dd, *J* = 9.9, 1.3 Hz, 1H), 1.34 (s, 9H), 0.99 (s, 9H).

**<sup>13</sup>C NMR** (101 MHz, CDCl<sub>3</sub>): δ = 196.7 (C<sub>q</sub>), 151.7 (C<sub>q</sub>), 150.2 (C<sub>q</sub>), 147.7 (C<sub>q</sub>), 146.0 (CH), 145.9 (C<sub>q</sub>), 145.5 (C<sub>q</sub>), 144.8 (C<sub>q</sub>), 141.6 (C<sub>q</sub>), 135.2 (C<sub>q</sub>), 133.6 (C<sub>q</sub>), 130.7 (CH), 129.8 (CH), 129.6 (C<sub>q</sub>), 128.5 (CH), 127.7 (CH), 127.5 (CH), 127.4 (CH), 126.9 (CH), 126.9 (CH), 126.6 (CH), 126.6 (CH), 126.4 (CH), 126.1 (CH), 125.7 (CH), 124.6 (CH), 123.8 (CH), 121.8 (CH), 121.6 (CH), 71.3 (C<sub>q</sub>), 31.4 (CH<sub>3</sub>), 30.9 (CH<sub>3</sub>).

**IR** (ATR):  $\tilde{\nu}$  = 2963, 1667, 1596, 1461, 1393, 1364, 1234, 1198, 745, 699 cm<sup>-1</sup>.

**MS** (ESI) *m/z* (relative intensity): 509 (100) [M+H]<sup>+</sup>, 531 (40) [M+Na]<sup>+</sup>.

**HR-MS** (ESI): *m/z* calcd for C<sub>38</sub>H<sub>37</sub>O<sup>+</sup> [M+H]<sup>+</sup>: 509.2944, found: 509.2876.

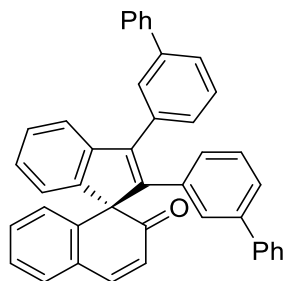

### 2,3-Di{[1,1'-biphenyl]-3-yl}-2'*H*-spiro[indene-1,1'-naphthalen]-2'-one (**3ak**)

The general procedure **A** was followed using 1-phenylnaphthalen-2-ol (**1a**) (176.0 mg, 0.80 mmol) and 1,2-di([1,1'-biphenyl]-3-yl)ethyne (132.0 mg, 0.40 mmol). Purification by column chromatography (*n*-hexane/EtOAc = 10:1) yielded **3ak** (153 mg, 70%), as a yellow solid.

**<sup>1</sup>H NMR** (300 MHz, CDCl<sub>3</sub>):  $\delta$  = 7.87 (s, 1H), 7.72 (d, *J* = 9.9 Hz, 2H), 7.61 (d, 4H), 7.50 – 7.35 (m, 5H), 7.33 – 7.27 (m, 7H), 7.20 (t, *J* = 7.6 Hz, 1H), 7.18 – 7.14 (m, 2H), 7.14 – 7.02 (m, 4H), 6.87 (d, *J* = 7.8 Hz, 1H), 6.47 (d, *J* = 9.9 Hz, 1H).

**<sup>13</sup>C NMR** (101 MHz, CDCl<sub>3</sub>):  $\delta$  = 196.5 (C<sub>q</sub>), 147.7 (C<sub>q</sub>), 146.2 (CH), 145.3 (C<sub>q</sub>), 144.9 (C<sub>q</sub>), 142.0 (C<sub>q</sub>), 141.0 (C<sub>q</sub>), 140.8 (C<sub>q</sub>), 140.6 (C<sub>q</sub>), 140.3 (C<sub>q</sub>), 135.8 (C<sub>q</sub>), 134.5 (C<sub>q</sub>), 130.8 (CH), 129.9 (CH), 129.7 (C<sub>q</sub>), 129.5 (CH), 128.7 (CH), 128.5 (CH), 128.5 (CH), 128.4 (CH), 128.3 (CH), 127.8 (CH), 127.6 (CH), 127.6 (CH), 127.4 (CH), 127.2 (CH), 127.1 (CH), 127.0 (CH), 126.7 (CH), 126.6 (CH), 126.5 (CH), 126.5 (CH), 125.7 (CH), 121.9 (CH), 121.7 (CH), 71.6 (C<sub>q</sub>). One C<sub>q</sub> is missing due to the overlap.

**IR** (ATR):  $\tilde{\nu}$  = 2989, 1711, 1657, 1595, 1561, 1450, 1360, 1219, 757, 698 cm<sup>-1</sup>.

**MS** (ESI) *m/z* (relative intensity): 549 (100) [M+H]<sup>+</sup>, 571 (30) [M+Na]<sup>+</sup>.

**HR-MS** (ESI): *m/z* calcd for C<sub>42</sub>H<sub>29</sub>O<sup>+</sup> [M+H]<sup>+</sup>: 549.2218, found: 549.2213.

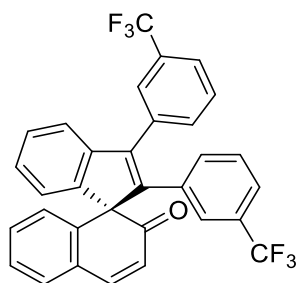

### 2,3-Bis[3-(trifluoromethyl)phenyl]-2'*H*-spiro[indene-1,1'-naphthalen]-2'-one (**3al**)

The general procedure **A** was followed using 1-phenylnaphthalen-2-ol (**1a**) (176.0 mg, 0.80 mmol) and 1,2-bis[3-(trifluoromethyl)phenyl]ethyne (126.0 mg, 0.40 mmol). Purification by column chromatography (*n*-hexane/EtOAc = 10:1) yielded **3al** (111 mg, 52%), as a yellow solid.



**<sup>1</sup>H NMR** (400 MHz, CDCl<sub>3</sub>):  $\delta$  = 7.79 (s, 1H), 7.73 – 7.67 (m, 3H), 7.59 (t,  $J$  = 7.7 Hz, 1H), 7.47 (d,  $J$  = 7.6 Hz, 1H), 7.35 – 7.28 (m, 4H), 7.22 (t,  $J$  = 7.6 Hz, 1H), 7.18 – 7.10 (m, 2H), 7.08 – 7.03 (m, 2H), 6.94 (t,  $J$  = 8.7 Hz, 2H), 6.41 (d,  $J$  = 10.0 Hz, 1H).

**<sup>13</sup>C NMR** (101 MHz, CDCl<sub>3</sub>):  $\delta$  = 196.0 (C<sub>q</sub>), 147.7 (C<sub>q</sub>), 146.4 (CH), 144.8 (C<sub>q</sub>), 144.6 (C<sub>q</sub>), 144.2 (C<sub>q</sub>), 139.9 (C<sub>q</sub>), 135.3 (C<sub>q</sub>), 134.5 (C<sub>q</sub>), 132.8 (d,  $^4J_{C-F}$  = 1.4 Hz, CH), 132.0 (d,  $^4J_{C-F}$  = 1.5 Hz, CH), 131.5 (d,  $^2J_{C-F}$  = 32.4 Hz, C<sub>q</sub>), 130.9 (CH), 130.6 (C<sub>q</sub>), 130.2 (CH), 130.2 (CH), 129.6 (CH), 128.7 (CH), 128.1 (CH), 128.1 (CH), 127.2 (CH), 126.9 (CH), 126.4 (CH), 126.1 (q,  $^3J_{C-F}$  = 3.8 Hz, CH), 125.6 (q,  $^3J_{C-F}$  = 4.0 Hz, CH), 125.0 (q,  $^3J_{C-F}$  = 3.7 Hz, CH), 124.0 (q,  $^3J_{C-F}$  = 3.7 Hz, CH), 122.4 (d,  $^2J_{C-F}$  = 30.3 Hz, C<sub>q</sub>), 121.9 (q,  $^2J_{C-F}$  = 27.9 Hz, CH), 71.7 (C<sub>q</sub>).

**<sup>19</sup>F NMR** (376 MHz, CDCl<sub>3</sub>):  $\delta$  = -63.1 (d,  $J$  = 225.0 Hz).

**IR** (ATR):  $\tilde{\nu}$  = 3063, 1665, 1325, 1301, 1166, 1119, 1073, 908, 762, 706 cm<sup>-1</sup>.

**MS** (ESI)  $m/z$  (relative intensity): 533 (100) [M+H]<sup>+</sup>, 555 (80) [M+Na]<sup>+</sup>.

**HR-MS** (ESI):  $m/z$  calcd for C<sub>32</sub>H<sub>19</sub>F<sub>6</sub>O<sup>+</sup> [M+H]<sup>+</sup>: 533.1340, found: 533.1335.

The analytical data are in accordance with those reported in the literature.<sup>2</sup>

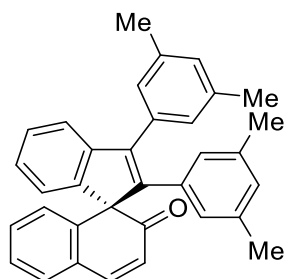

### 2,3-Bis(3,5-dimethylphenyl)-2'*H*-spiro[indene-1,1'-naphthalen]-2'-one (**3am**)

The general procedure **A** was followed using 1-phenylnaphthalen-2-ol (**1a**) (176.0 mg, 0.80 mmol) and 1,2-bis(3,5-dimethylphenyl)ethyne (94.0 mg, 0.40 mmol). Purification by column chromatography (*n*-hexane/EtOAc = 10:1) yielded **3am** (121 mg, 67%), as a yellow solid.

**<sup>1</sup>H NMR** (400 MHz, CDCl<sub>3</sub>):  $\delta$  = 7.69 (d,  $J$  = 10.0 Hz, 1H), 7.43 (d,  $J$  = 7.6 Hz, 1H), 7.25 – 7.13 (m, 5H), 7.08 – 7.00 (m, 2H), 7.00 – 6.90 (m, 2H), 6.64 (s, 1H), 6.47 (s, 2H), 6.42 (d,  $J$  = 9.9 Hz, 1H), 2.35 (s, 6H), 1.98 (s, 6H).

**<sup>13</sup>C NMR** (101 MHz, CDCl<sub>3</sub>):  $\delta$  = 196.8 (C<sub>q</sub>), 147.4 (C<sub>q</sub>), 146.0 (CH), 145.9 (C<sub>q</sub>), 144.7 (C<sub>q</sub>), 144.6 (C<sub>q</sub>), 141.6 (C<sub>q</sub>), 138.2 (C<sub>q</sub>), 136.9 (C<sub>q</sub>), 135.3 (C<sub>q</sub>), 133.9 (C<sub>q</sub>), 130.7 (CH), 129.7 (CH), 129.5 (C<sub>q</sub>), 129.3 (CH), 128.7 (CH), 127.6 (CH), 127.4 (CH), 127.0 (CH), 126.9 (CH), 126.7 (CH), 126.6 (CH), 126.0 (CH), 121.9 (CH), 121.4 (CH), 71.5 (C<sub>q</sub>), 21.3 (CH<sub>3</sub>), 21.2 (CH<sub>3</sub>).

**IR** (ATR):  $\tilde{\nu}$  = 2915, 1713, 1665, 1598, 1562, 1462, 1196, 841, 761, 746 cm<sup>-1</sup>.

**MS** (ESI)  $m/z$  (relative intensity): 453 (100)  $[M+H]^+$ , 475 (33)  $[M+Na]^+$ .

**HR-MS** (ESI):  $m/z$  calcd for  $C_{34}H_{29}O^+$   $[M+H]^+$ : 453.2218, found: 453.2213.

The analytical data are in accordance with those reported in the literature.<sup>2</sup>

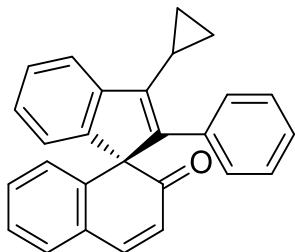

### 3-Cyclopropyl-2-phenyl-2'*H*-spiro[indene-1,1'-naphthalen]-2'-one (**3an**)

The general procedure **A** was followed using 1-phenylnaphthalen-2-ol (**1a**) (176.0 mg, 0.80 mmol) and (cyclopropylethynyl)benzene (57.0 mg, 0.40 mmol). Purification by column chromatography (*n*-hexane/EtOAc = 10:1) yielded **3an** (108 mg, 75%), as a yellow solid.

**<sup>1</sup>H NMR** (300 MHz,  $CDCl_3$ ):  $\delta$  = 7.58 (dd,  $J$  = 9.0, 3.6 Hz, 2H), 7.37 (d,  $J$  = 7.6 Hz, 1H), 7.29 (d,  $J$  = 7.5 Hz, 1H), 7.22 (d,  $J$  = 7.5 Hz, 1H), 7.17 – 7.09 (m, 6H), 7.03 (t,  $J$  = 7.5 Hz, 1H), 6.91 (d,  $J$  = 7.5 Hz, 1H), 6.76 (d,  $J$  = 7.8 Hz, 1H), 6.30 (d,  $J$  = 9.9 Hz, 1H), 2.06 – 1.96 (m, 1H), 1.01 – 0.93 (m, 2H), 0.69 – 0.63 (m, 2H).

**<sup>13</sup>C NMR** (101 MHz,  $CDCl_3$ ):  $\delta$  = 197.2 ( $C_q$ ), 147.8 ( $C_q$ ), 146.1 ( $C_q$ ), 146.0 (CH), 145.7 ( $C_q$ ), 144.6 ( $C_q$ ), 141.2 ( $C_q$ ), 134.8 ( $C_q$ ), 130.4 (CH), 129.8 ( $C_q$ ), 129.7 (CH), 129.0 (CH), 127.8 (CH), 127.6 (CH), 127.4 (CH), 127.0 (CH), 127.0 (CH), 126.6 (CH), 126.0 (CH), 121.5 (CH), 121.4 (CH), 71.5 ( $C_q$ ), 9.0 (CH), 7.4 ( $CH_2$ ), 7.4 ( $CH_2$ ).

**IR** (ATR):  $\tilde{\nu}$  = 2951, 1711, 1657, 1561, 1360, 1220, 1028, 822, 744, 693  $cm^{-1}$ .

**MS** (ESI)  $m/z$  (relative intensity): 361 (100)  $[M+H]^+$ , 383 (40)  $[M+Na]^+$ .

**HR-MS** (ESI):  $m/z$  calcd for  $C_{27}H_{21}O^+$   $[M+H]^+$ : 361.1592, found: 361.1587.

The analytical data are in accordance with those reported in the literature.<sup>2</sup>

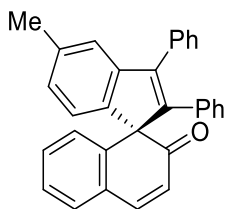

### 5-Methyl-2,3-diphenyl-2'*H*-spiro[indene-1,1'-naphthalen]-2'-one (**3ba**)

The general procedure **A** was followed using 1-(p-tolyl)naphthalen-2-ol (187.0 mg, 0.80 mmol) and 1,2-diphenylethyne (**2a**) (71.0 mg, 0.40 mmol). Purification by column chromatography (*n*-hexane/EtOAc = 10:1) yielded **3ba** (135 mg, 82%), as a yellow solid.

**<sup>1</sup>H NMR** (400 MHz, CDCl<sub>3</sub>):  $\delta$  = 7.67 (d, *J* = 9.9 Hz, 1H), 7.60 – 7.53 (m, 2H), 7.51 – 7.45 (m, 2H), 7.45 – 7.38 (m, 2H), 7.33 – 7.24 (m, 1H), 7.17 (t, *J* = 7.6, 1.4 Hz, 1H), 7.11 (s, 1H), 7.04 – 6.96 (m, 4H), 6.94 – 6.82 (m, 4H), 6.41 (d, *J* = 9.9 Hz, 1H), 2.32 (s, 3H).

**<sup>13</sup>C NMR** (101 MHz, CDCl<sub>3</sub>):  $\delta$  = 196.8 (C<sub>q</sub>), 146.0 (CH), 145.5 (C<sub>q</sub>), 145.2 (C<sub>q</sub>), 144.9 (C<sub>q</sub>), 144.6 (C<sub>q</sub>), 141.3 (C<sub>q</sub>), 137.6 (C<sub>q</sub>), 135.3 (C<sub>q</sub>), 134.3 (C<sub>q</sub>), 130.6 (CH), 129.8 (CH), 129.6 (C<sub>q</sub>), 129.5 (CH), 129.0 (CH), 128.8 (CH), 127.9 (CH), 127.8 (CH), 127.4 (CH), 127.1 (CH), 126.9 (CH), 126.8 (CH), 126.5 (CH), 122.5 (CH), 121.3 (CH), 71.3 (C<sub>q</sub>), 21.5 (CH<sub>3</sub>).

**IR** (ATR):  $\tilde{\nu}$  = 3053, 1712, 1664, 1561, 1442, 1361, 1220, 870, 746, 702 cm<sup>-1</sup>.

**MS** (ESI) *m/z* (relative intensity): 411 (100) [M+H]<sup>+</sup>, 433 (10) [M+Na]<sup>+</sup>.

**HR-MS** (ESI): *m/z* calcd for C<sub>31</sub>H<sub>23</sub>O<sup>+</sup> [M+H]<sup>+</sup>: 411.1749, found: 411.1741.

The analytical data are in accordance with those reported in the literature.<sup>3</sup>

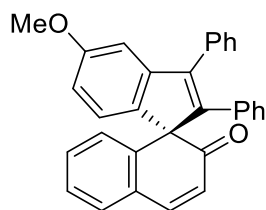

### 5-Methoxy-2,3-diphenyl-2'*H*-spiro[indene-1,1'-naphthalen]-2'-one (**3bb**)

The general procedure **A** was followed using 1-(4-methoxyphenyl)naphthalen-2-ol (200.0 mg, 0.80 mmol) and 1,2-diphenylethyne (**2a**) (71.0 mg, 0.40 mmol). Purification by column chromatography (*n*-hexane/EtOAc = 10:1) yielded **3bb** (138 mg, 81%), as a yellow solid.

**<sup>1</sup>H NMR** (400 MHz, CDCl<sub>3</sub>):  $\delta$  = 7.65 (d, *J* = 9.9 Hz, 1H), 7.59 – 7.51 (m, 2H), 7.50 – 7.38 (m, 4H), 7.30 – 7.24 (m, 1H), 7.17 (td, *J* = 7.6, 1.5 Hz, 1H), 7.04 – 6.96 (m, 4H), 6.92 (d, *J* = 8.3 Hz, 1H), 6.87 – 6.81 (m, 3H), 6.62 (dd, *J* = 8.3, 2.5 Hz, 1H), 6.39 (d, *J* = 9.9 Hz, 1H), 3.74 (s, 3H).

**<sup>13</sup>C NMR** (101 MHz, CDCl<sub>3</sub>):  $\delta$  = 196.8 (C<sub>q</sub>), 159.8 (C<sub>q</sub>), 147.0 (C<sub>q</sub>), 146.2 (C<sub>q</sub>), 146.0 (CH), 144.5 (C<sub>q</sub>), 141.4 (C<sub>q</sub>), 139.9 (C<sub>q</sub>), 135.0 (C<sub>q</sub>), 134.3 (C<sub>q</sub>), 130.6 (CH), 129.8 (CH), 129.6 (C<sub>q</sub>), 129.4 (CH), 129.0 (CH), 128.8 (CH), 127.8 (CH), 127.8 (CH), 127.8 (CH), 127.4 (CH), 127.0 (CH), 126.9 (CH), 126.4 (CH), 122.2 (CH), 111.8 (CH), 107.7 (CH), 71.0 (C<sub>q</sub>), 55.4 (CH<sub>3</sub>).

**IR** (ATR):  $\tilde{\nu}$  = 2900, 1711, 1657, 1593, 1468, 1218, 1149, 1028, 745, 692 cm<sup>-1</sup>.

**MS** (ESI) *m/z* (relative intensity): 427 (100) [M+H]<sup>+</sup>, 449 (50) [M+Na]<sup>+</sup>.

**HR-MS** (ESI): *m/z* calcd for C<sub>31</sub>H<sub>23</sub>O<sub>2</sub><sup>+</sup> [M+H]<sup>+</sup>: 427.1698, found: 427.1693.

The analytical data are in accordance with those reported in the literature.<sup>2</sup>

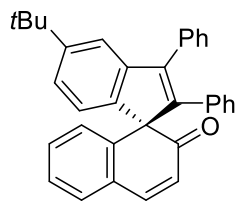

### 5-(*Tert*-butyl)-2,3-diphenyl-2'*H*-spiro[indene-1,1'-naphthalen]-2'-one (**3bc**)

The general procedure **A** was followed using 1-(4-(*tert*-butyl)phenyl)naphthalen-2-ol (221.0 mg, 0.80 mmol) and 1,2-diphenylethyne (**2a**) (71.0 mg, 0.40 mmol). Purification by column chromatography (*n*-hexane/EtOAc = 10:1) yielded **3bc** (165 mg, 91%), as a yellow solid.

**<sup>1</sup>H NMR** (400 MHz, CDCl<sub>3</sub>):  $\delta$  = 7.67 (d, *J* = 9.9 Hz, 1H), 7.56 (d, *J* = 6.9 Hz, 2H), 7.52 – 7.37 (m, 4H), 7.32 (d, *J* = 1.7 Hz, 1H), 7.28 – 7.22 (m, 1H), 7.17 (td, *J* = 7.6, 1.4 Hz, 1H), 7.10 (dd, *J* = 8.0, 1.8 Hz, 1H), 7.08 – 6.89 (m, 5H), 6.90 – 6.81 (m, 2H), 6.40 (d, *J* = 9.9 Hz, 1H), 1.27 (s, 9H).

**<sup>13</sup>C NMR** (101 MHz, CDCl<sub>3</sub>):  $\delta$  = 196.9 (C<sub>q</sub>), 150.8 (C<sub>q</sub>), 146.1 (CH), 145.0 (C<sub>q</sub>), 145.0 (C<sub>q</sub>), 144.9 (C<sub>q</sub>), 144.7 (C<sub>q</sub>), 141.4 (C<sub>q</sub>), 135.3 (C<sub>q</sub>), 134.5 (C<sub>q</sub>), 130.5 (CH), 129.8 (CH), 129.6 (C<sub>q</sub>), 129.5 (CH), 129.1 (CH), 128.8 (CH), 127.9 (CH), 127.7 (CH), 127.4 (CH), 127.0 (CH), 126.8 (CH), 126.5 (CH), 123.5 (CH), 121.0 (CH), 118.9 (CH), 71.4 (C<sub>q</sub>), 34.8 (C<sub>q</sub>), 31.5 (CH<sub>3</sub>).

**IR** (ATR):  $\tilde{\nu}$  = 3053, 1663, 1562, 1394, 1264, 1234, 1124, 870, 730, 700 cm<sup>-1</sup>.

**MS** (ESI) *m/z* (relative intensity): 453 (100) [M+H]<sup>+</sup>, 475 (60) [M+Na]<sup>+</sup>.

**HR-MS** (ESI): *m/z* calcd for C<sub>34</sub>H<sub>29</sub>O<sup>+</sup> [M+H]<sup>+</sup>: 453.2218, found: 453.2213.

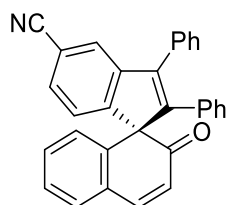

### 2'-Oxo-2,3-diphenyl-2'*H*-spiro[indene-1,1'-naphthalene]-5-carbonitrile (**3bd**)

The general procedure **A** was followed using 4-(2-hydroxynaphthalen-1-yl)benzonitrile (196.0 mg, 0.80 mmol) and 1,2-diphenylethyne (**2a**) (71.0 mg, 0.40 mmol). Purification by column chromatography (*n*-hexane/EtOAc = 10:1) yielded **3bd** (140 mg, 83%), as a yellow solid.

**<sup>1</sup>H NMR** (400 MHz, CDCl<sub>3</sub>):  $\delta$  = 7.71 (d, *J* = 9.9 Hz, 1H), 7.56 (s, 1H), 7.51 – 7.42 (m, 6H), 7.39 – 7.30 (m, 2H), 7.21 (t, *J* = 7.6 Hz, 1H), 7.10 – 6.97 (m, 4H), 6.92 (d, *J* = 7.8 Hz, 1H), 6.85 (d, *J* = 7.3 Hz, 2H), 6.41 (d, *J* = 9.9 Hz, 1H).

**<sup>13</sup>C NMR** (101 MHz, CDCl<sub>3</sub>):  $\delta$  = 195.1 (C<sub>q</sub>), 151.9 (C<sub>q</sub>), 147.4 (C<sub>q</sub>), 146.6 (C<sub>q</sub>), 146.6 (CH), 143.1 (C<sub>q</sub>), 139.1 (C<sub>q</sub>), 133.8 (C<sub>q</sub>), 133.3 (C<sub>q</sub>), 130.9 (CH), 130.3 (CH), 130.2 (CH), 129.6 (C<sub>q</sub>), 129.2

(CH), 129.1 (CH), 129.0 (CH), 128.4 (CH), 128.2 (CH), 128.1 (CH), 127.7 (CH), 126.8 (CH), 126.3 (CH), 124.9 (CH), 122.4 (CH), 118.9 (C<sub>q</sub>), 111.7 (C<sub>q</sub>), 71.8 (C<sub>q</sub>).

**IR** (ATR):  $\tilde{\nu}$  = 3003, 1712, 1439, 1418, 1356, 1219, 1092, 901, 786, 528 cm<sup>-1</sup>.

**MS** (ESI)  $m/z$  (relative intensity): 422 (100) [M+H]<sup>+</sup>, 444 (20) [M+Na]<sup>+</sup>.

**HR-MS** (ESI):  $m/z$  calcd for C<sub>31</sub>H<sub>20</sub>NO<sup>+</sup> [M+H]<sup>+</sup>: 422.1545, found: 422.1539.

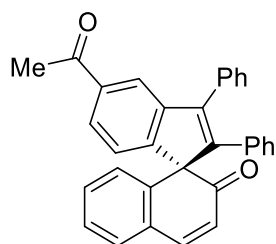

### 5-Acetyl-2,3-diphenyl-2'*H*-spiro[indene-1,1'-naphthalen]-2'-one (**3be**)

The general procedure **A** was followed using 1-(4-(2-hydroxynaphthalen-1-yl)phenyl)ethan-1-one (210.0 mg, 0.80 mmol) and 1,2-diphenylethyne (**2a**) (71.0 mg, 0.40 mmol). Purification by column chromatography (*n*-hexane/EtOAc = 10:1) yielded **3be** (161 mg, 92%), as a yellow solid.

**<sup>1</sup>H NMR** (400 MHz, CDCl<sub>3</sub>):  $\delta$  = 7.88 (d,  $J$  = 1.5 Hz, 1H), 7.74 – 7.64 (m, 2H), 7.54 (d,  $J$  = 6.7 Hz, 2H), 7.51 – 7.39 (m, 4H), 7.30 (t,  $J$  = 7.5 Hz, 1H), 7.19 (t,  $J$  = 7.6 Hz, 1H), 7.09 (d,  $J$  = 7.8 Hz, 1H), 7.04 – 6.93 (m, 4H), 6.85 (dd,  $J$  = 7.6, 1.7 Hz, 2H), 6.41 (d,  $J$  = 9.9 Hz, 1H), 2.53 (s, 3H).

**<sup>13</sup>C NMR** (101 MHz, CDCl<sub>3</sub>):  $\delta$  = 197.7 (C<sub>q</sub>), 195.7 (C<sub>q</sub>), 152.4 (C<sub>q</sub>), 146.4 (C<sub>q</sub>), 146.1 (CH), 143.9 (C<sub>q</sub>), 139.9 (C<sub>q</sub>), 137.0 (C<sub>q</sub>), 134.4 (C<sub>q</sub>), 133.8 (C<sub>q</sub>), 130.8 (CH), 130.1 (CH), 129.6 (C<sub>q</sub>), 129.3 (CH), 129.0 (CH), 129.0 (CH), 128.1 (CH), 128.0 (CH), 127.9 (CH), 127.3 (CH), 127.0 (CH), 126.8 (CH), 126.3 (CH), 121.7 (CH), 121.3 (CH), 71.6 (C<sub>q</sub>), 26.7 (CH<sub>3</sub>).

**IR** (ATR):  $\tilde{\nu}$  = 2951, 1711, 1681, 1662, 1424, 1360, 1232, 746, 693, 600 cm<sup>-1</sup>.

**MS** (ESI)  $m/z$  (relative intensity): 439 (100) [M+H]<sup>+</sup>, 461 (5) [M+Na]<sup>+</sup>.

**HR-MS** (ESI):  $m/z$  calcd for C<sub>32</sub>H<sub>23</sub>O<sub>2</sub><sup>+</sup> [M+H]<sup>+</sup>: 439.1698, found: 439.1694.

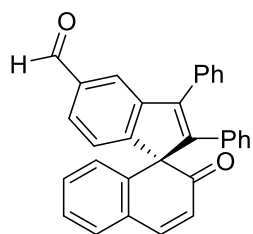

### 2'-Oxo-2,3-diphenyl-2'*H*-spiro[indene-1,1'-naphthalene]-5-carbaldehyde (**3bf**)

The general procedure **A** was followed using 4-(2-hydroxynaphthalen-1-yl)benzaldehyde (198.0

mg, 0.80 mmol) and 1,2-diphenylethyne (**2a**) (71.0 mg, 0.40 mmol). Purification by column chromatography (*n*-hexane/EtOAc = 10:1) yielded **3bf** (132 mg, 78%), as a yellow solid.

**<sup>1</sup>H NMR** (400 MHz, CDCl<sub>3</sub>): δ = 9.95 (s, 1H), 7.80 (s, 1H), 7.71 (d, *J* = 10.0 Hz, 1H), 7.61 (d, *J* = 7.8, 1.4 Hz, 1H), 7.54 (d, *J* = 6.8 Hz, 2H), 7.51 – 7.40 (m, 4H), 7.31 (t, *J* = 7.5 Hz, 1H), 7.23 – 7.13 (m, 2H), 7.07 – 6.98 (m, 3H), 6.95 (d, *J* = 7.8 Hz, 1H), 6.89 – 6.82 (m, 2H), 6.42 (d, *J* = 9.9 Hz, 1H).

**<sup>13</sup>C NMR** (101 MHz, CDCl<sub>3</sub>): δ = 195.5 (C<sub>q</sub>), 191.9 (CHO), 153.8 (C<sub>q</sub>), 146.7 (C<sub>q</sub>), 146.6 (C<sub>q</sub>), 146.5 (CH), 143.7 (C<sub>q</sub>), 139.7 (C<sub>q</sub>), 136.3 (C<sub>q</sub>), 134.3 (C<sub>q</sub>), 133.7 (C<sub>q</sub>), 130.9 (CH), 130.2 (CH), 129.6 (C<sub>q</sub>), 129.3 (CH), 129.0 (CH), 129.0 (CH), 128.9 (CH), 128.2 (CH), 128.1 (CH), 128.0 (CH), 127.5 (CH), 126.8 (CH), 126.4 (CH), 122.2 (CH), 122.2 (CH), 71.7 (C<sub>q</sub>).

**IR** (ATR):  $\tilde{\nu}$  = 3050, 1695, 1657, 1593, 1561, 1394, 1196, 813, 733, 701 cm<sup>-1</sup>.

**MS** (ESI) *m/z* (relative intensity): 425 (100) [M+H]<sup>+</sup>.

**HR-MS** (ESI): *m/z* calcd for C<sub>31</sub>H<sub>21</sub>O<sub>2</sub><sup>+</sup> [M+H]<sup>+</sup>: 425.1542, found: 425.1536.

The analytical data are in accordance with those reported in the literature.<sup>2</sup>

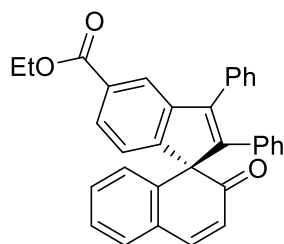

### **Ethyl 2'-oxo-2,3-diphenyl-2'H-spiro[indene-1,1'-naphthalene]-5-carboxylate (**3bg**)**

The general procedure **A** was followed using ethyl 4-(2-hydroxynaphthalen-1-yl)benzoate (234.0 mg, 0.80 mmol) and 1,2-diphenylethyne (**2a**) (71.0 mg, 0.40 mmol). Purification by column chromatography (*n*-hexane/EtOAc = 10:1) yielded **3bg** (157 mg, 84%), as a yellow solid.

**<sup>1</sup>H NMR** (400 MHz, CDCl<sub>3</sub>): δ = 7.96 (s, 1H), 7.81 (d, *J* = 8.3 Hz, 1H), 7.69 (d, *J* = 9.9 Hz, 1H), 7.54 (d, *J* = 7.1 Hz, 2H), 7.52 – 7.39 (m, 4H), 7.30 (t, *J* = 7.5 Hz, 1H), 7.18 (t, *J* = 7.6 Hz, 1H), 7.10 – 6.91 (m, 5H), 6.89 – 6.81 (m, 2H), 6.41 (d, *J* = 9.9 Hz, 1H), 4.34 (q, *J* = 7.1 Hz, 2H), 1.34 (t, *J* = 7.1 Hz, 3H).

**<sup>13</sup>C NMR** (101 MHz, CDCl<sub>3</sub>): δ = 195.8 (C<sub>q</sub>), 166.4 (C<sub>q</sub>), 152.2 (C<sub>q</sub>), 146.3 (CH), 146.2 (C<sub>q</sub>), 145.8 (C<sub>q</sub>), 144.0 (C<sub>q</sub>), 140.1 (C<sub>q</sub>), 134.5 (C<sub>q</sub>), 133.9 (C<sub>q</sub>), 130.8 (CH), 130.3 (C<sub>q</sub>), 130.1 (CH), 129.6 (C<sub>q</sub>), 129.4 (CH), 129.0 (CH), 128.9 (CH), 128.0 (CH), 128.0 (CH), 128.0 (CH), 127.9 (CH), 127.3 (CH), 126.8 (CH), 126.4 (CH), 122.7 (CH), 121.6 (CH), 71.6 (C<sub>q</sub>), 60.9 (CH<sub>2</sub>), 14.3 (CH<sub>3</sub>).

**IR** (ATR):  $\tilde{\nu}$  = 3545, 1714, 1665, 1285, 1247, 1231, 1089, 745, 702 cm<sup>-1</sup>.

**MS** (ESI)  $m/z$  (relative intensity): 469 (100)  $[M+H]^+$ , 491 (30)  $[M+Na]^+$ .

**HR-MS** (ESI):  $m/z$  calcd for  $C_{33}H_{25}O_3^+$   $[M+H]^+$ : 469.1804, found: 469.1798.

The analytical data are in accordance with those reported in the literature.<sup>2</sup>

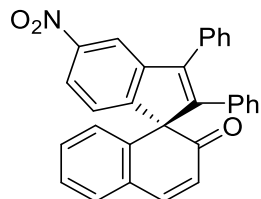

### 5-Nitro-2,3-diphenyl-2'*H*-spiro[indene-1,1'-naphthalen]-2'-one (**3bh**)

The general procedure **A** was followed using 1-(4-nitrophenyl)naphthalen-2-ol (212.0 mg, 0.80 mmol) and 1,2-diphenylethyne (**2a**) (71.0 mg, 0.40 mmol). Purification by column chromatography (*n*-hexane/EtOAc = 10:1) yielded **3bh** (166 mg, 94%), as a yellow solid.

**<sup>1</sup>H NMR** (400 MHz,  $CDCl_3$ ):  $\delta$  = 8.11 (d,  $J$  = 2.1 Hz, 1H), 7.98 (dd,  $J$  = 8.4, 2.1 Hz, 1H), 7.72 (d,  $J$  = 9.9 Hz, 1H), 7.64 – 7.40 (m, 6H), 7.34 (t,  $J$  = 7.5 Hz, 1H), 7.22 (t,  $J$  = 7.6 Hz, 1H), 7.12 (d,  $J$  = 8.4 Hz, 1H), 7.09 – 6.97 (m, 3H), 6.93 (d,  $J$  = 7.6 Hz, 1H), 6.85 (d,  $J$  = 7.5 Hz, 2H), 6.42 (d,  $J$  = 9.9 Hz, 1H).

**<sup>13</sup>C NMR** (101 MHz,  $CDCl_3$ ):  $\delta$  = 194.9 ( $C_q$ ), 153.7 ( $C_q$ ), 148.3 ( $C_q$ ), 148.1 ( $C_q$ ), 147.3 ( $C_q$ ), 146.7 (CH), 143.1 ( $C_q$ ), 139.0 ( $C_q$ ), 133.7 ( $C_q$ ), 133.3 ( $C_q$ ), 131.0 (CH), 130.4 (CH), 129.6 ( $C_q$ ), 129.2 (CH), 129.2 (CH), 129.0 (CH), 128.5 (CH), 128.3 (CH), 128.1 (CH), 127.8 (CH), 126.8 (CH), 126.2 (CH), 122.2 (CH), 121.8 (CH), 116.5 (CH), 71.5 ( $C_q$ ).

**IR** (ATR):  $\tilde{\nu}$  = 3050, 1712, 1665, 1562, 1520, 1343, 1220, 831, 740, 703  $cm^{-1}$ .

**MS** (ESI)  $m/z$  (relative intensity): 442 (100)  $[M+H]^+$ , 464 (60)  $[M+Na]^+$ .

**HR-MS** (ESI):  $m/z$  calcd for  $C_{30}H_{20}NO_3^+$   $[M+H]^+$ : 442.1443, found: 442.1441.

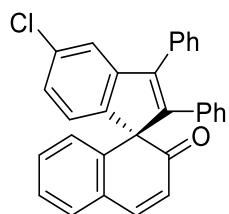

### 5-Chloro-2,3-diphenyl-2'*H*-spiro[indene-1,1'-naphthalen]-2'-one (**3bi**)

The general procedure **A** was followed using 1-(4-chlorophenyl)naphthalen-2-ol (203.0 mg, 0.80 mmol) and 1,2-diphenylethyne (**2a**) (71.0 mg, 0.40 mmol). Purification by column chromatography (*n*-hexane/EtOAc = 5:1) yielded **3bi** (161 mg, 93%), as a yellow solid.

**<sup>1</sup>H NMR** (400 MHz, CDCl<sub>3</sub>): δ = 7.67 (d, *J* = 9.9 Hz, 1H), 7.52 (d, *J* = 6.7 Hz, 2H), 7.50 – 7.39 (m, 4H), 7.35 – 7.27 (m, 2H), 7.19 (t, *J* = 7.6 Hz, 1H), 7.08 – 6.90 (m, 6H), 6.85 (d, *J* = 7.1 Hz, 2H), 6.40 (d, *J* = 9.9 Hz, 1H).

**<sup>13</sup>C NMR** (101 MHz, CDCl<sub>3</sub>): δ = 196.0 (C<sub>q</sub>), 147.3 (C<sub>q</sub>), 146.8 (C<sub>q</sub>), 146.3 (CH), 145.9 (C<sub>q</sub>), 143.7 (C<sub>q</sub>), 140.3 (C<sub>q</sub>), 134.4 (C<sub>q</sub>), 133.9 (C<sub>q</sub>), 133.8 (C<sub>q</sub>), 130.7 (CH), 130.0 (CH), 129.6 (C<sub>q</sub>), 129.3 (CH), 129.0 (CH), 129.0 (CH), 128.1 (CH), 128.0 (CH), 127.8 (CH), 127.3 (CH), 126.8 (CH), 126.3 (CH), 126.2 (CH), 122.7 (CH), 121.9 (CH), 71.1 (C<sub>q</sub>) .

**IR** (ATR):  $\tilde{\nu}$  = 3050, 1711, 1657, 1455, 1360, 1219, 1071, 864, 743, 703 cm<sup>-1</sup>.

**MS** (ESI) *m/z* (relative intensity): 431 (100) [M+H]<sup>+</sup>, 453 (50) [M+Na]<sup>+</sup>.

**HR-MS** (ESI): *m/z* calcd for C<sub>30</sub>H<sub>20</sub>ClO<sup>+</sup> [M+H]<sup>+</sup>: 431.1203, found: 431.1201.

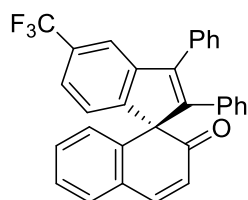

### 2,3-Diphenyl-5-(trifluoromethyl)-2'*H*-spiro[indene-1,1'-naphthalen]-2'-one (**3bj**)

The general procedure **A** was followed using 1-[4-(trifluoromethyl)phenyl]naphthalen-2-ol (230 mg, 0.8 mmol) and 1,2-diphenylethyne (**2a**) (71 mg, 0.4 mmol). Purification by column chromatography (*n*-hexane/EtOAc = 5:1) yielded **3bj** (150 mg, 81%), as a yellow solid.

**<sup>1</sup>H NMR** (400 MHz, CDCl<sub>3</sub>): δ = 7.70 (d, *J* = 9.9 Hz, 1H), 7.56 – 7.41 (m, 7H), 7.37 – 7.28 (m, 2H), 7.20 (t, *J* = 7.6 Hz, 1H), 7.10 (d, *J* = 7.9 Hz, 1H), 7.06 – 6.97 (m, 3H), 6.94 (d, *J* = 7.9 Hz, 1H), 6.85 (d, *J* = 7.8 Hz, 2H), 6.42 (d, *J* = 9.9 Hz, 1H).

**<sup>13</sup>C NMR** (101 MHz, CDCl<sub>3</sub>): δ = 195.7 (C<sub>q</sub>), 151.0 (C<sub>q</sub>), 151.0 (C<sub>q</sub>), 147.0 (C<sub>q</sub>), 146.5 (CH), 146.3 (C<sub>q</sub>), 143.7 (C<sub>q</sub>), 139.8 (C<sub>q</sub>), 134.2 (C<sub>q</sub>), 133.7 (C<sub>q</sub>), 130.9 (CH), 130.2 (CH), 129.7 (C<sub>q</sub>), 129.4 (CH), 129.1 (CH), 128.2 (CH), 128.0 (CH), 127.5 (CH), 126.9 (CH), 126.4 (CH), 123.3 (q, <sup>3</sup>*J*<sub>C-F</sub> = 3.9 Hz, CH), 122.0 (CH), 118.5 (q, <sup>3</sup>*J*<sub>C-F</sub> = 3.7 Hz, CH), 71.6 (C<sub>q</sub>).

**<sup>19</sup>F NMR** (282 MHz, CDCl<sub>3</sub>): δ = -62.1 (s).

**IR** (ATR):  $\tilde{\nu}$  = 3050, 1668, 1350, 1315, 1263, 1170, 1121, 1060, 746, 700 cm<sup>-1</sup>.

**MS** (ESI) *m/z* (relative intensity): 465 (100) [M+H]<sup>+</sup>, 487 (80) [M+Na]<sup>+</sup>.

**HR-MS** (ESI): *m/z* calcd for C<sub>31</sub>H<sub>20</sub>F<sub>3</sub>O<sup>+</sup> [M+H]<sup>+</sup>: 465.1466, found: 465.1461.

The analytical data are in accordance with those reported in the literature.<sup>2</sup>



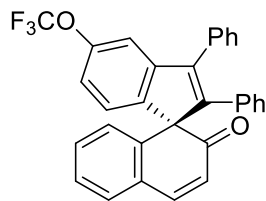

### 2,3-Diphenyl-5-(trifluoromethoxy)-2'*H*-spiro[indene-1,1'-naphthalen]-2'-one (**3bk**)

The general procedure **A** was followed using 1-(4-(trifluoromethoxy)phenyl)naphthalen-2-ol (243.0 mg, 0.80 mmol) and 1,2-diphenylethyne (**2a**) (71.0 mg, 0.40 mmol). Purification by column chromatography (*n*-hexane/EtOAc = 10:1) yielded **3bk** (169 mg, 88%), as a yellow solid.

**<sup>1</sup>H NMR** (400 MHz, CDCl<sub>3</sub>):  $\delta$  = 7.68 (d, *J* = 9.9 Hz, 1H), 7.56 – 7.40 (m, 6H), 7.30 (t, *J* = 7.4 Hz, 1H), 7.21 (t, *J* = 7.5 Hz, 1H), 7.13 (s, 1H), 7.06 – 6.90 (m, 6H), 6.87 – 6.81 (m, 2H), 6.40 (d, *J* = 9.9 Hz, 1H).

**<sup>13</sup>C NMR** (101 MHz, CDCl<sub>3</sub>):  $\delta$  = 196.0 (C<sub>q</sub>), 149.2 (q, <sup>4</sup>*J*<sub>C-F</sub> = 1,9 Hz, CH), 149.2, 149.2, 149.2, 147.5 (C<sub>q</sub>), 147.2 (C<sub>q</sub>), 146.3 (CH), 145.9 (C<sub>q</sub>), 143.7 (C<sub>q</sub>), 140.2 (C<sub>q</sub>), 134.3 (C<sub>q</sub>), 133.8 (C<sub>q</sub>), 130.80 (CH), 130.08 (CH), 129.60 (C<sub>q</sub>), 129.31 (CH), 129.06 (CH), 129.00 (CH), 128.18 (CH), 128.0 (CH), 127.9 (CH), 127.4 (CH), 126.9 (CH), 126.4 (CH), 122.6 (CH), 118.7 (CH), 114.7 (CH), 71.2 (C<sub>q</sub>).

**<sup>19</sup>F NMR** (282 MHz, CDCl<sub>3</sub>):  $\delta$  = -57.7 (s).

**IR** (ATR):  $\tilde{\nu}$  = 3050, 1664, 1594, 1466, 1253, 1195, 1118, 865, 745, 701 cm<sup>-1</sup>.

**MS** (ESI) *m/z* (relative intensity): 481 (100) [M+H]<sup>+</sup>, 503 (20) [M+Na]<sup>+</sup>.

**HR-MS** (ESI): *m/z* calcd for C<sub>31</sub>H<sub>20</sub>F<sub>3</sub>O<sub>2</sub><sup>+</sup> [M+H]<sup>+</sup>: 481.1415, found: 481.1410.

The analytical data are in accordance with those reported in the literature.<sup>2</sup>

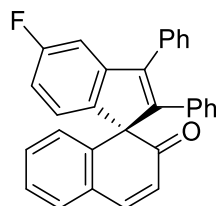

### 5-Fluoro-2,3-diphenyl-2'*H*-spiro[indene-1,1'-naphthalen]-2'-one (**3bl**)

The general procedure **A** was followed using 1-(4-fluorophenyl)naphthalen-2-ol (190.0 mg, 0.80 mmol) and 1,2-diphenylethyne (**2a**) (71.0 mg, 0.40 mmol). Purification by column chromatography (*n*-hexane/EtOAc = 5:1) yielded **3bl** (139 mg, 84%), as a yellow solid.

**<sup>1</sup>H NMR** (300 MHz, CDCl<sub>3</sub>):  $\delta$  = 7.67 (d,  $J$  = 9.9 Hz, 1H), 7.55 – 7.38 (m, 6H), 7.28 (dd,  $J$  = 13.3, 5.6 Hz, 1H), 7.19 (t,  $J$  = 7.6 Hz, 1H), 7.06 – 6.90 (m, 6H), 6.84 (d,  $J$  = 7.1 Hz, 2H), 6.75 (td,  $J$  = 8.7, 2.4 Hz, 1H), 6.39 (d,  $J$  = 9.9 Hz, 1H).

**<sup>13</sup>C NMR** (101 MHz, CDCl<sub>3</sub>):  $\delta$  = 196.3 (C<sub>q</sub>), 163.0 (d,  $^1J_{C-F}$  = 244.8 Hz, C<sub>q</sub>), 147.7 (d,  $^3J_{C-F}$  = 8.8 Hz, C<sub>q</sub>), 147.1 (C<sub>q</sub>), 146.2 (CH), 143.8 (d,  $^4J_{C-F}$  = 3.2 Hz, C<sub>q</sub>), 143.1 (d,  $^4J_{C-F}$  = 2.6 Hz, C<sub>q</sub>), 140.6 (C<sub>q</sub>), 134.5 (C<sub>q</sub>), 133.9 (C<sub>q</sub>), 130.7 (CH), 130.0 (CH), 129.6 (C<sub>q</sub>), 129.3 (CH), 129.0 (CH), 128.9 (CH), 128.1 (CH), 128.0 (CH), 127.7 (CH), 127.3 (CH), 126.8 (CH), 126.4 (CH), 122.7 (d,  $^3J_{C-F}$  = 9.2 Hz, CH), 112.9 (d,  $^2J_{C-F}$  = 23.5 Hz, CH), 109.1 (d,  $^2J_{C-F}$  = 24.3 Hz, CH), 71.0 (C<sub>q</sub>).

**<sup>19</sup>F NMR** (376 MHz, CDCl<sub>3</sub>):  $\delta$  = -114.3 (td,  $J$  = 9.1, 5.0 Hz).

**IR** (ATR):  $\tilde{\nu}$  = 3060, 1712, 1665, 1593, 1466, 1200, 1140, 872, 745, 702 cm<sup>-1</sup>.

**MS** (ESI)  $m/z$  (relative intensity): 415 (100) [M+H]<sup>+</sup>, 437 (70) [M+Na]<sup>+</sup>.

**HR-MS** (ESI):  $m/z$  calcd for C<sub>30</sub>H<sub>20</sub>FO<sup>+</sup> [M+H]<sup>+</sup>: 415.1498, found: 415.1493.

The analytical data are in accordance with those reported in the literature.<sup>2</sup>

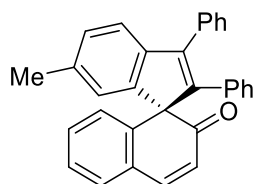

### 6-Methyl-2,3-diphenyl-2'*H*-spiro[indene-1,1'-naphthalen]-2'-one (**3bm**)

The general procedure **A** was followed using 1-(*m*-tolyl)naphthalen-2-ol (187 mg, 0.2 mmol) and 1,2-diphenylethyne (**2a**) (71 mg, 0.4 mmol). Purification by column chromatography (*n*-hexane/EtOAc = 10:1) yielded **3bm** (131 mg, 80%), as a yellow solid.

**<sup>1</sup>H NMR** (400 MHz, CDCl<sub>3</sub>):  $\delta$  = 7.69 (d,  $J$  = 9.9 Hz, 1H), 7.56 (d, 2H), 7.51 – 7.39 (m, 4H), 7.35 – 7.16 (m, 3H), 7.08 (d,  $J$  = 7.9 Hz, 1H), 7.05 – 6.95 (m, 4H), 6.95 – 6.82 (m, 3H), 6.43 (d,  $J$  = 9.9 Hz, 1H), 2.26 (s, 3H).

**<sup>13</sup>C NMR** (101 MHz, CDCl<sub>3</sub>):  $\delta$  = 196.8 (C<sub>q</sub>), 147.9 (C<sub>q</sub>), 146.1 (CH), 144.5 (C<sub>q</sub>), 144.1 (C<sub>q</sub>), 142.7 (C<sub>q</sub>), 141.3 (C<sub>q</sub>), 136.2 (C<sub>q</sub>), 135.3 (C<sub>q</sub>), 134.4 (C<sub>q</sub>), 130.6 (CH), 129.8 (CH), 129.6 (C<sub>q</sub>), 129.4 (CH), 129.0 (CH), 128.7 (CH), 128.5 (CH), 127.8 (CH), 127.7 (CH), 127.4 (CH), 126.9 (CH), 126.8 (CH), 126.5 (CH), 122.4 (CH), 121.5 (CH), 71.4 (C<sub>q</sub>), 21.4 (CH<sub>3</sub>).

**IR** (ATR):  $\tilde{\nu}$  = 3020, 1711, 1657, 1360, 1219, 1029, 845, 743, 700, 530 cm<sup>-1</sup>.

**MS** (ESI)  $m/z$  (relative intensity): 411 (100) [M+H]<sup>+</sup>, 433 (70) [M+Na]<sup>+</sup>.

**HR-MS** (ESI):  $m/z$  calcd for C<sub>31</sub>H<sub>23</sub>O<sup>+</sup> [M+H]<sup>+</sup>: 411.1749, found: 411.1743.

The analytical data are in accordance with those reported in the literature.<sup>2</sup>

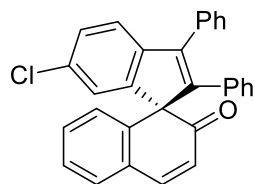

### 6-Chloro-2,3-diphenyl-2'*H*-spiro[indene-1,1'-naphthalen]-2'-one (**3bn**)

The general procedure **A** was followed using 1-(3-chlorophenyl)naphthalen-2-ol (203 mg, 0.8 mmol) and 1,2-diphenylethyne (**2a**) (71 mg, 0.4 mmol). Purification by column chromatography (*n*-hexane/EtOAc = 10:1) yielded **3bn** (141 mg, 82%), as a yellow solid

**<sup>1</sup>H NMR** (400 MHz, CDCl<sub>3</sub>): δ = 7.69 (d, *J* = 9.9 Hz, 1H), 7.57 – 7.39 (m, 6H), 7.30 (t, *J* = 7.5 Hz, 1H), 7.21 (d, *J* = 5.6 Hz, 3H), 7.06 – 6.93 (m, 5H), 6.83 (dd, *J* = 7.6, 1.6 Hz, 2H), 6.41 (d, *J* = 9.9 Hz, 1H).

**<sup>13</sup>C NMR** (101 MHz, CDCl<sub>3</sub>): δ = 195.9 (C<sub>q</sub>), 149.0 (C<sub>q</sub>), 146.4 (CH), 145.5 (C<sub>q</sub>), 144.0 (C<sub>q</sub>), 143.8 (C<sub>q</sub>), 140.1 (C<sub>q</sub>), 134.7 (C<sub>q</sub>), 133.9 (C<sub>q</sub>), 131.9 (C<sub>q</sub>), 130.8 (CH), 130.1 (CH), 129.6 (C<sub>q</sub>), 129.4 (CH), 129.0 (CH), 128.9 (CH), 128.0 (CH), 128.0 (CH), 128.0 (CH), 127.9 (CH), 127.2 (CH), 126.9 (CH), 126.4 (CH), 122.6 (CH), 122.2 (CH), 71.3 (C<sub>q</sub>).

**IR** (ATR):  $\tilde{\nu}$  = 3053, 1657, 1561, 1441, 1233, 1197, 822, 777, 729, 689 cm<sup>-1</sup>.

**MS** (ESI) *m/z* (relative intensity): 431 (100) [M+H]<sup>+</sup>, 453 (60) [M+Na]<sup>+</sup>.

**HR-MS** (ESI): *m/z* calcd for C<sub>30</sub>H<sub>20</sub>ClO<sup>+</sup> [M+H]<sup>+</sup>: 431.1203, found: 431.1197.

The analytical data are in accordance with those reported in the literature.<sup>4</sup>

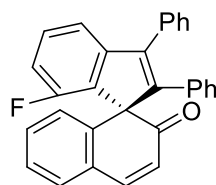

### 7-Fluoro-2,3-diphenyl-2'*H*-spiro[indene-1,1'-naphthalen]-2'-one (**3bo**)

The general procedure **A** was followed using 1-(2-fluorophenyl)naphthalen-2-ol (190.0 mg, 0.80 mmol) and 1,2-diphenylethyne (**2a**) (71.0 mg, 0.40 mmol). Purification by column chromatography (*n*-hexane/EtOAc = 5:1) yielded **3bo** (90 mg, 54%), as a yellow solid.

**<sup>1</sup>H NMR** (400 MHz, CDCl<sub>3</sub>): δ = 7.57 (d, *J* = 9.9 Hz, 1H), 7.45 (d, *J* = 6.9 Hz, 2H), 7.42 – 7.25 (m, 7H), 7.16 (d, *J* = 7.6 Hz, 1H), 7.06 – 6.94 (m, 4H), 6.81 (t, *J* = 8.7 Hz, 1H), 6.76 – 6.69 (m, 2H), 6.37 (d, *J* = 9.9 Hz, 1H).

**<sup>13</sup>C NMR** (101 MHz, CDCl<sub>3</sub>):  $\delta$  = 195.7 (C<sub>q</sub>), 158.3 (C<sub>q</sub>), 155.8 (C<sub>q</sub>), 149.1 (d, <sup>3</sup>J<sub>C-F</sub> = 5.3 Hz, C<sub>q</sub>), 148.3 (d, <sup>4</sup>J<sub>C-F</sub> = 1.5 Hz, C<sub>q</sub>), 146.1 (CH), 143.3 (d, <sup>4</sup>J<sub>C-F</sub> = 2.5 Hz, C<sub>q</sub>), 138.4 (C<sub>q</sub>), 135.0 (d, <sup>2</sup>J<sub>C-F</sub> = 15.9 Hz, C<sub>q</sub>), 134.1 (d, <sup>1</sup>J<sub>C-F</sub> = 40.2 Hz, C<sub>q</sub>), 130.4 (C<sub>q</sub>), 130.35 (CH), 130.0 (d, <sup>3</sup>J<sub>C-F</sub> = 7.3 Hz, CH), 129.7 (CH), 129.5 (CH), 128.9 (CH), 128.6 (CH), 127.9 (CH), 127.8 (CH), 127.4 (CH), 126.8 (CH), 126.8 (CH), 117.4 (d, <sup>4</sup>J<sub>C-F</sub> = 3.0 Hz, CH), 113.8 (d, <sup>2</sup>J<sub>C-F</sub> = 20.1 Hz, CH), 69.0 (d, <sup>3</sup>J<sub>C-F</sub> = 2.0 Hz, C<sub>q</sub>).

**<sup>19</sup>F NMR** (376 MHz, CDCl<sub>3</sub>):  $\delta$  = -119.6 (dd, *J* = 9.2, 5.0 Hz).

**IR** (ATR):  $\tilde{\nu}$  = 3050, 1663, 1616, 1487, 1469, 1240, 1201, 769, 734, 700 cm<sup>-1</sup>.

**MS** (ESI) *m/z* (relative intensity): 415 (100) [M+H]<sup>+</sup>, 437 (10) [M+Na]<sup>+</sup>.

**HR-MS** (ESI): *m/z* calcd for C<sub>30</sub>H<sub>20</sub>FO<sup>+</sup> [M+H]<sup>+</sup>: 415.1498, found: 415.1493.

The analytical data are in accordance with those reported in the literature.<sup>2</sup>

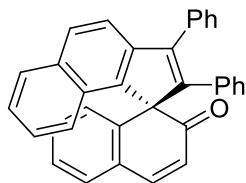

### 2,3-Diphenyl-2'*H*-spiro[cyclopenta[*a*]naphthalene-1,1'-naphthalen]-2'-one (**3bp**)

The general procedure **A** was followed using [1,2'-binaphthalen]-2-ol (216.0 mg, 0.80 mmol) and 1,2-diphenylethyne (**2a**) (71.0 mg, 0.40 mmol). Purification by column chromatography (*n*-hexane/EtOAc = 10:1) yielded **3bp** (162 mg, 91%), as a yellow solid.

**<sup>1</sup>H NMR** (400 MHz, CDCl<sub>3</sub>):  $\delta$  = 7.93 – 7.84 (m, 2H), 7.66 (d, *J* = 8.5 Hz, 1H), 7.60 (d, *J* = 9.9 Hz, 1H), 7.47 (d, *J* = 7.5 Hz, 2H), 7.43 – 7.25 (m, 7H), 7.18 – 7.11 (m, 2H), 7.11 – 7.05 (m, 1H), 7.00 (t, *J* = 7.5 Hz, 2H), 6.81 (d, *J* = 7.8 Hz, 1H), 6.71 (d, *J* = 7.6 Hz, 2H), 6.41 (d, *J* = 9.9 Hz, 1H).

**<sup>13</sup>C NMR** (101 MHz, CDCl<sub>3</sub>):  $\delta$  = 196.7 (C<sub>q</sub>), 150.1 (C<sub>q</sub>), 145.9 (CH), 145.8 (C<sub>q</sub>), 144.6 (C<sub>q</sub>), 143.4 (C<sub>q</sub>), 140.0 (C<sub>q</sub>), 134.4 (C<sub>q</sub>), 134.3 (C<sub>q</sub>), 133.1 (C<sub>q</sub>), 130.6 (CH), 130.3 (C<sub>q</sub>), 129.7 (CH), 129.6 (CH), 129.1 (CH), 129.0 (CH), 128.9 (CH), 128.4 (CH), 128.1 (C<sub>q</sub>), 127.7 (CH), 127.7 (CH), 127.6 (CH), 127.3 (CH), 127.3 (CH), 127.3 (CH), 127.0 (CH), 124.9 (CH), 123.3 (CH), 119.8 (CH), 71.4 (C<sub>q</sub>).

**IR** (ATR):  $\tilde{\nu}$  = 3053, 1656, 1560, 1485, 1263, 1235, 1200, 820, 735, 701 cm<sup>-1</sup>.

**MS** (ESI) *m/z* (relative intensity): 447 (100) [M+H]<sup>+</sup>, 469 (50) [M+Na]<sup>+</sup>.

**HR-MS** (ESI): *m/z* calcd for C<sub>34</sub>H<sub>23</sub>O<sup>+</sup> [M+H]<sup>+</sup>: 447.1749, found: 447.1744.

The analytical data are in accordance with those reported in the literature.<sup>2</sup>

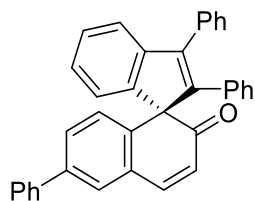

### 2,3,6'-Triphenyl-2'*H*-spiro[indene-1,1'-naphthalen]-2'-one (**3bq**)

The general procedure **A** was followed using 1,6-diphenylnaphthalen-2-ol (237.0 mg, 0.20 mmol) and 1,2-diphenylethyne (**2a**) (71.0 mg, 0.40 mmol). Purification by column chromatography (*n*-hexane/EtOAc=10:1) yielded **3bq** (177 mg, 94%), as a yellow solid.

**<sup>1</sup>H NMR** (400 MHz, CDCl<sub>3</sub>):  $\delta$  = 7.75 (d, *J* = 9.9 Hz, 1H), 7.66 (d, *J* = 1.9 Hz, 1H), 7.57 (dd, *J* = 7.5, 2.6 Hz, 4H), 7.50 – 7.30 (m, 9H), 7.13 – 6.98 (m, 6H), 6.94 – 6.89 (m, 2H), 6.46 (d, *J* = 9.9 Hz, 1H).

**<sup>13</sup>C NMR** (101 MHz, CDCl<sub>3</sub>):  $\delta$  = 196.6 (C<sub>q</sub>), 147.6 (C<sub>q</sub>), 146.1 (CH), 145.4 (C<sub>q</sub>), 144.9 (C<sub>q</sub>), 144.7 (C<sub>q</sub>), 140.5 (C<sub>q</sub>), 139.9 (C<sub>q</sub>), 139.7 (C<sub>q</sub>), 135.1 (C<sub>q</sub>), 134.3 (C<sub>q</sub>), 130.0 (C<sub>q</sub>), 129.5 (CH), 129.3 (CH), 129.1 (CH), 128.9 (CH), 128.8 (CH), 128.4 (CH), 128.0 (CH), 127.8 (CH), 127.8 (CH), 127.7 (CH), 127.3 (CH), 127.0 (CH), 126.9 (CH), 126.8 (CH), 126.3 (CH), 121.9 (CH), 121.7 (CH), 71.5 (C<sub>q</sub>).

**IR** (ATR):  $\tilde{\nu}$  = 3050, 1664, 1483, 1264, 1218, 1188, 1029, 895, 729, 690 cm<sup>-1</sup>.

**MS** (ESI) *m/z* (relative intensity): 473 (100) [M+H]<sup>+</sup>, 495 (80) [M+Na]<sup>+</sup>.

**HR-MS** (ESI): *m/z* calcd for C<sub>36</sub>H<sub>25</sub>O<sup>+</sup> [M+H]<sup>+</sup>: 473.1905, found: 473.1900.

The analytical data are in accordance with those reported in the literature.<sup>4</sup>

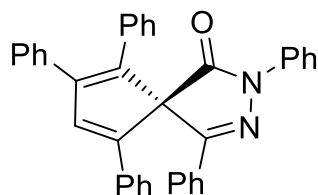

### 2,4,6,7,9-Pentaphenyl-2,3-diazaspiro[4.4]nona-3,6,8-trien-1-one (*rac*-**4a**)

The general procedure **B** was followed using 2,5-diphenyl-4-(1-phenylethylidene)-2,4-dihydro-3H-pyrazol-3-one (**1b**) (51.0 mg, 0.15 mmol) and 1,2-diphenylethyne (**2a**) (18.0 mg, 0.10 mmol). Purification by column chromatography (*n*-hexane/EtOAc=10:1) yielded *rac*-**4a** (34 mg, 67%), as a yellow solid.

### (*S*)-2,4,6,7,9-pentaphenyl-2,3-diazaspiro[4.4]nona-3,6,8-trien-1-one (**4a'**)

The general procedure **C** was followed using 2,5-diphenyl-4-(1-phenylethylidene)-2,4-dihydro-

3H-pyrazol-3-one (**1b**) (51.0 mg, 0.15 mmol) and 1,2-diphenylethyne (**2a**) (18.0 mg, 0.10 mmol). Purification by column chromatography (*n*-hexane/EtOAc=10:1) yielded **4a'** (30 mg, 57%), as a yellow solid.

**<sup>1</sup>H NMR** (400 MHz, CDCl<sub>3</sub>): δ = 7.88 – 7.84 (m, 2H), 7.83 – 7.77 (m, 2H), 7.60 (s, 1H), 7.47 – 7.40 (m, 4H), 7.39 – 7.27 (m, 10H), 7.25 – 7.08 (m, 5H), 7.04 – 6.97 (m, 2H).

**<sup>13</sup>C NMR** (101 MHz, CDCl<sub>3</sub>): δ = 169.3 (C<sub>q</sub>), 156.2 (C<sub>q</sub>), 145.5 (C<sub>q</sub>), 145.3 (C<sub>q</sub>), 140.3 (C<sub>q</sub>), 137.9 (C<sub>q</sub>), 135.3 (CH), 134.4 (C<sub>q</sub>), 133.5 (C<sub>q</sub>), 133.2 (C<sub>q</sub>), 131.1 (C<sub>q</sub>), 130.8 (CH), 129.0 (CH), 128.9 (CH), 128.8 (CH), 128.5 (CH), 128.4 (CH), 128.4 (CH), 128.1 (CH), 128.0 (CH), 128.0 (CH), 125.8 (CH), 125.7 (CH), 125.2 (CH), 119.8 (CH), 76.6 (C<sub>q</sub>).

**IR** (ATR):  $\tilde{\nu}$  = 3062, 1712, 1595, 1492, 1445, 1300, 1135, 754, 732, 687 cm<sup>-1</sup>.

**MS** (ESI) *m/z* (relative intensity): 515 (40) [M+H]<sup>+</sup>, 537 (60) [M+Na]<sup>+</sup>.

**HR-MS** (ESI): *m/z* calcd for C<sub>37</sub>H<sub>27</sub>N<sub>2</sub>O<sup>+</sup> [M+H]<sup>+</sup>: 515.2118, found: 515.2118.

**HPLC separation** (Chiralpak® IC-3, *n*-hexane/*i*-PrOH 99:1, 1.0 mL/min, detection at 250 nm): tr (major) = 16.1 min, tr (minor) = 15.1 min, 93 : 7 er.

[α]<sub>D</sub><sup>20</sup>: -205.0 (c = 0.1, CHCl<sub>3</sub>).

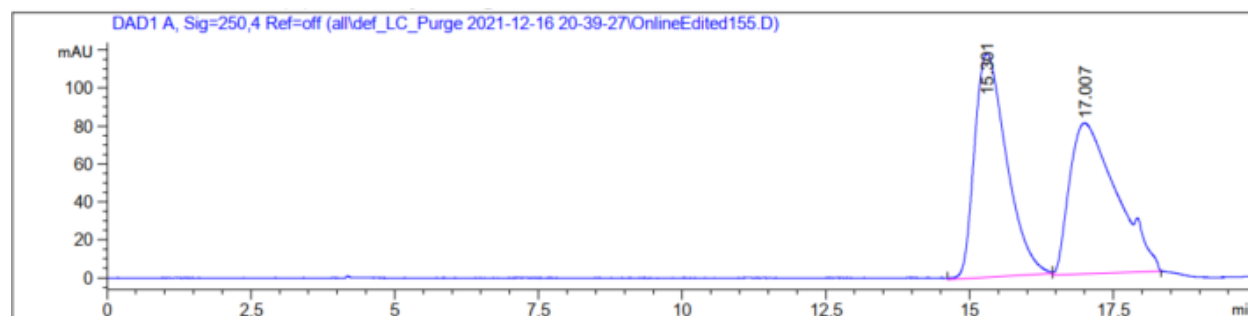

Signal 1: DAD1 A, Sig=250,4 Ref=off

| Peak # | RetTime [min] | Type | Width [min] | Area [mAU*s] | Height [mAU] | Area %  |
|--------|---------------|------|-------------|--------------|--------------|---------|
| 1      | 15.301        | MM R | 0.6444      | 4552.94629   | 117.75687    | 50.2104 |
| 2      | 17.007        | MM R | 0.9486      | 4514.78711   | 79.32169     | 49.7896 |

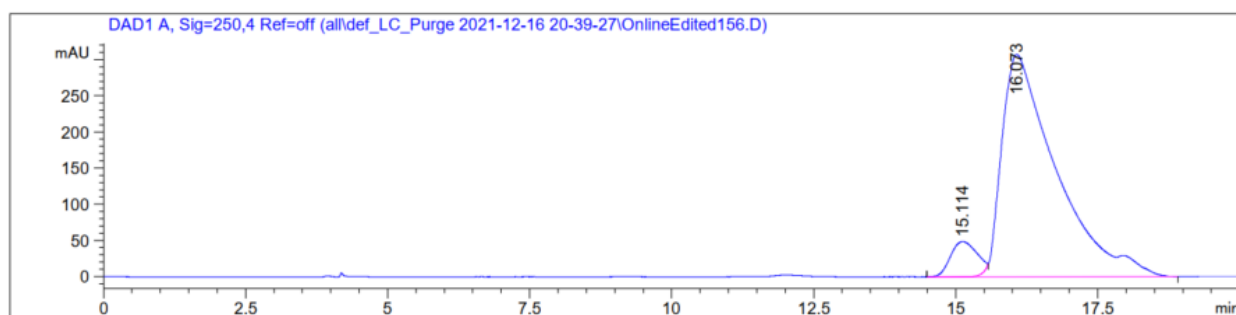

Signal 1: DAD1 A, Sig=250,4 Ref=off

| Peak # | RetTime [min] | Type | Width [min] | Area [mAU*s] | Height [mAU] | Area %  |
|--------|---------------|------|-------------|--------------|--------------|---------|
| 1      | 15.114        | BV E | 0.3927      | 1561.50330   | 48.61350     | 7.0911  |
| 2      | 16.073        | VV R | 0.8875      | 2.04591e4    | 307.62772    | 92.9089 |

The analytical data are in accordance with those reported in the literature.<sup>5</sup>

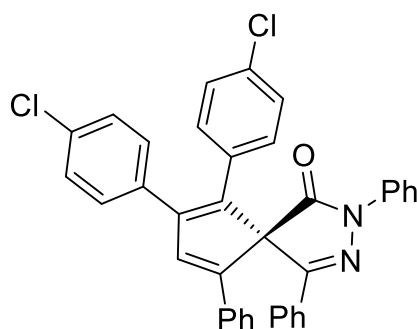

**6,7-Bis(4-chlorophenyl)-2,4,9-triphenyl-2,3-diazaspiro[4.4]nona-3,6,8-trien-1-one (*rac*-4b)**

The general procedure **B** was followed using 2,5-diphenyl-4-(1-phenylethylidene)-2,4-dihydro-3H-pyrazol-3-one (**1b**) (51.0 mg, 0.15 mmol) and 1,2-bis(4-chlorophenyl)ethyne (25.0 mg, 0.10 mmol). Purification by column chromatography (*n*-hexane/EtOAc=10:1) yielded **rac**-4b (41 mg, 71%), as a yellow solid.

**(S)-6,7-bis(4-chlorophenyl)-2,4,9-triphenyl-2,3-diazaspiro[4.4]nona-3,6,8-trien-1-one (4b')**

The general procedure **C** was followed using 2,5-diphenyl-4-(1-phenylethylidene)-2,4-dihydro-3H-pyrazol-3-one (**1b**) (51.0 mg, 0.15 mmol) and 1,2-bis(4-chlorophenyl)ethyne (18.0 mg, 0.10 mmol). Purification by column chromatography (*n*-hexane/EtOAc=10:1) yielded **4b'** (40 mg, 68%), as a yellow solid.

**$^1\text{H}$  NMR** (400 MHz,  $\text{CDCl}_3$ ):  $\delta$  = 7.88 – 7.82 (m, 2H), 7.75 – 7.69 (m, 2H), 7.49 (s, 1H), 7.46 – 7.34 (m, 3H), 7.34 – 7.27 (m, 8H), 7.26 – 7.16 (m, 4H), 7.09 (d,  $J$  = 8.4 Hz, 2H), 6.88 (d,  $J$  = 8.4 Hz, 2H).

**$^{13}\text{C}$  NMR** (101 MHz,  $\text{CDCl}_3$ ):  $\delta$  = 168.9 ( $\text{C}_q$ ), 155.9 ( $\text{C}_q$ ), 146.1 ( $\text{C}_q$ ), 145.1 ( $\text{C}_q$ ), 139.2 ( $\text{C}_q$ ), 137.7 ( $\text{C}_q$ ), 134.6 (CH), 134.3 ( $\text{C}_q$ ), 134.2 ( $\text{C}_q$ ), 132.9 ( $\text{C}_q$ ), 132.5 ( $\text{C}_q$ ), 131.7 ( $\text{C}_q$ ), 131.0 (CH), 130.8 ( $\text{C}_q$ ), 130.1 (CH), 129.7 (CH), 129.1 (CH), 129.0 (CH), 129.0 (CH), 128.9 (CH), 128.8 (CH), 128.4 (CH), 126.0 (CH), 125.7 (CH), 125.2 (CH), 119.6 (CH), 76.5 ( $\text{C}_q$ ).

**IR** (ATR):  $\tilde{\nu}$  = 1714, 1595, 1494, 1316, 1299, 1137, 832, 755, 688  $\text{cm}^{-1}$ .

**MS** (ESI)  $m/z$  (relative intensity): 583 (30)  $[\text{M}+\text{H}]^+$ , 605 (100)  $[\text{M}+\text{Na}]^+$ .

**HR-MS** (ESI):  $m/z$  calcd for  $\text{C}_{37}\text{H}_{25}\text{Cl}_2\text{N}_2\text{O}^+$   $[\text{M}+\text{H}]^+$ : 583.1338, found: 583.1332.

**HPLC separation** (Chiralpak® IC-3, *n*-hexane/*i*-PrOH 99:1, 1.0 mL/min, detection at 250 nm): tr (major) = 11.4 min, tr (minor) = 12.7 min, 86 : 14 er.

$[\alpha]_D^{20}$ : +14.0 ( $c$  = 0.1,  $\text{CHCl}_3$ ).

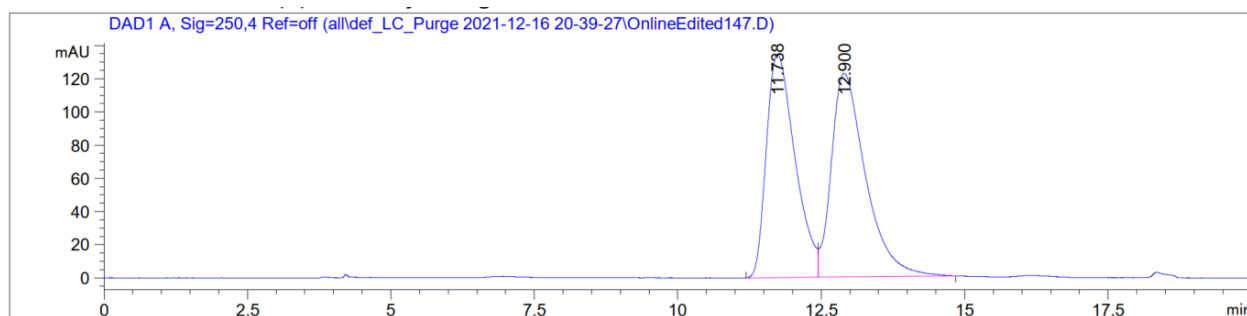

Signal 1: DAD1 A, Sig=250,4 Ref=off

| Peak # | RetTime [min] | Type | Width [min] | Area [mAU*s] | Height [mAU] | Area %  |
|--------|---------------|------|-------------|--------------|--------------|---------|
| 1      | 11.738        | BV   | 0.5014      | 4669.72900   | 134.71169    | 47.8135 |
| 2      | 12.900        | VB   | 0.5644      | 5096.81396   | 122.74881    | 52.1865 |

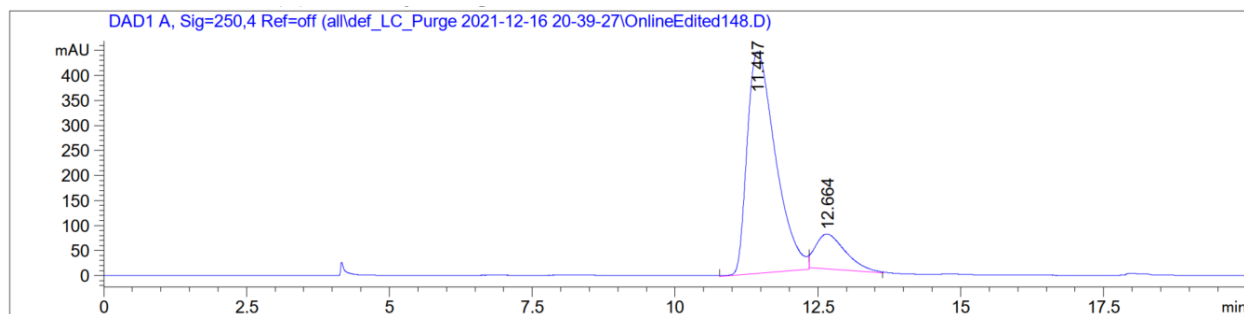



Signal 1: DAD1 A, Sig=250,4 Ref=off

| Peak # | RetTime [min] | Type | Width [min] | Area [mAU*s] | Height [mAU] | Area %  |
|--------|---------------|------|-------------|--------------|--------------|---------|
| 1      | 11.447        | MM R | 0.5759      | 1.53153e4    | 443.23203    | 85.7030 |
| 2      | 12.664        | MM R | 0.6123      | 2554.90430   | 69.54311     | 14.2970 |

The analytical data are in accordance with those reported in the literature.<sup>5</sup>

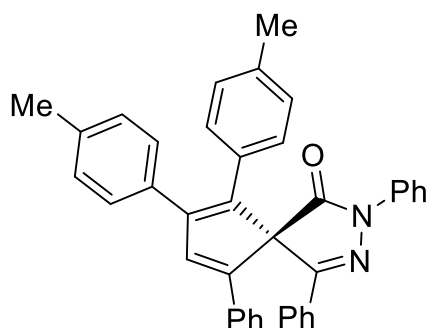

#### 2,4,9-Triphenyl-6,7-di-p-tolyl-2,3-diazaspiro[4.4]nona-3,6,8-trien-1-one (*rac*-**4c**)

The general procedure **B** was followed using 2,5-diphenyl-4-(1-phenylethylidene)-2,4-dihydro-3H-pyrazol-3-one (**1b**) (51.0 mg, 0.15 mmol) and 1,2-di-p-tolyne (21.0 mg, 0.10 mmol). Purification by column chromatography (*n*-hexane/EtOAc=10:1) yielded *rac*-**4c** (38 mg, 69%), as a yellow solid.

#### (*S*)-2,4,9-triphenyl-6,7-di-p-tolyl-2,3-diazaspiro[4.4]nona-3,6,8-trien-1-one (**4c'**)

The general procedure **C** was followed using 2,5-diphenyl-4-(1-phenylethylidene)-2,4-dihydro-3H-pyrazol-3-one (**1b**) (51.0 mg, 0.15 mmol) and 1,2-di-p-tolyne (21.0 mg, 0.10 mmol). Purification by column chromatography (*n*-hexane/EtOAc=10:1) yielded *rac*-**4c'** (30 mg, 54%), as a yellow solid.

**<sup>1</sup>H NMR** (400 MHz, CDCl<sub>3</sub>):  $\delta$  = 7.91 – 7.83 (m, 2H), 7.81 – 7.73 (m, 2H), 7.54 (s, 1H), 7.47 – 7.38 (m, 2H), 7.35 – 7.27 (m, 7H), 7.26 – 7.19 (m, 3H), 7.19 – 7.13 (m, 1H), 7.11 – 7.06 (m, 2H), 6.92 – 6.83 (m, 4H), 2.33 (s, 3H), 2.21 (s, 3H).

**<sup>13</sup>C NMR** (101 MHz, CDCl<sub>3</sub>):  $\delta$  = 169.5 (C<sub>q</sub>), 156.5 (C<sub>q</sub>), 145.0 (C<sub>q</sub>), 144.9 (C<sub>q</sub>), 139.8 (C<sub>q</sub>), 138.0 (C<sub>q</sub>), 137.8 (C<sub>q</sub>), 137.7 (C<sub>q</sub>), 135.6 (CH), 133.4 (C<sub>q</sub>), 131.6 (C<sub>q</sub>), 131.1 (C<sub>q</sub>), 130.7 (CH), 130.7 (C<sub>q</sub>), 129.2 (CH), 129.1 (CH), 129.0 (CH), 128.9 (CH), 128.8 (CH), 128.6 (CH), 128.3 (CH), 127.9 (CH), 125.9 (CH), 125.6 (CH), 125.1 (CH), 119.7 (CH), 76.6 (C<sub>q</sub>), 21.3 (CH<sub>3</sub>), 21.2 (CH<sub>3</sub>).

**IR** (ATR):  $\tilde{\nu}$  = 1716, 1595, 1498, 1317, 1300, 1137, 820, 756, 689 cm<sup>-1</sup>.

**MS** (ESI)  $m/z$  (relative intensity): 543 (100)  $[M+H]^+$ , 565 (60)  $[M+Na]^+$ .

**HR-MS** (ESI):  $m/z$  calcd for  $C_{39}H_{31}N_2O^+$   $[M+H]^+$ : 543.2436, found: 543.2431.

**HPLC separation** (Chiralpak® IE-3, MeOH/*i*-PrOH 90:10, 0.5 mL/min, detection at 250 nm): tr (major) = 11.5 min, tr (minor) = 19.4 min, 91 : 9 er.

$[\alpha]_D^{20}$ : -282.0 ( $c = 0.1$ ,  $CHCl_3$ )

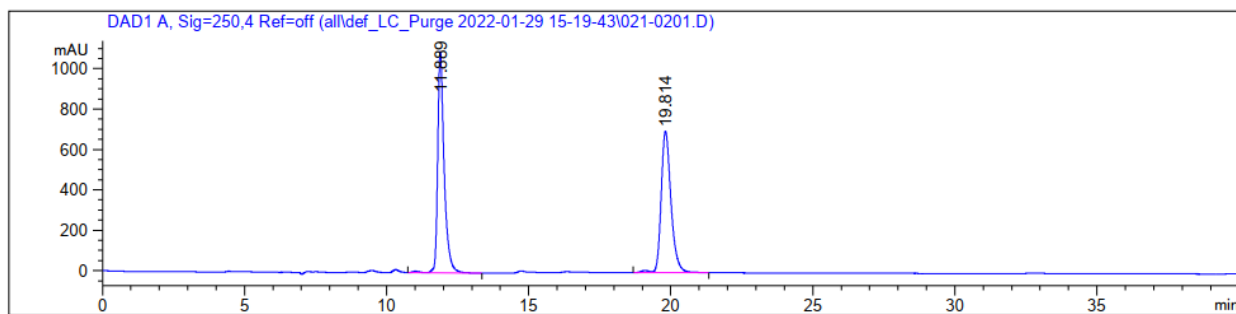

Signal 1: DAD1 A, Sig=250,4 Ref=off

| Peak # | RetTime [min] | Type | Width [min] | Area [mAU*s] | Height [mAU] | Area %  |
|--------|---------------|------|-------------|--------------|--------------|---------|
| 1      | 11.889        | VV R | 0.2321      | 1.74361e4    | 1095.55750   | 50.7165 |
| 2      | 19.814        | VV R | 0.3569      | 1.69434e4    | 699.79358    | 49.2835 |

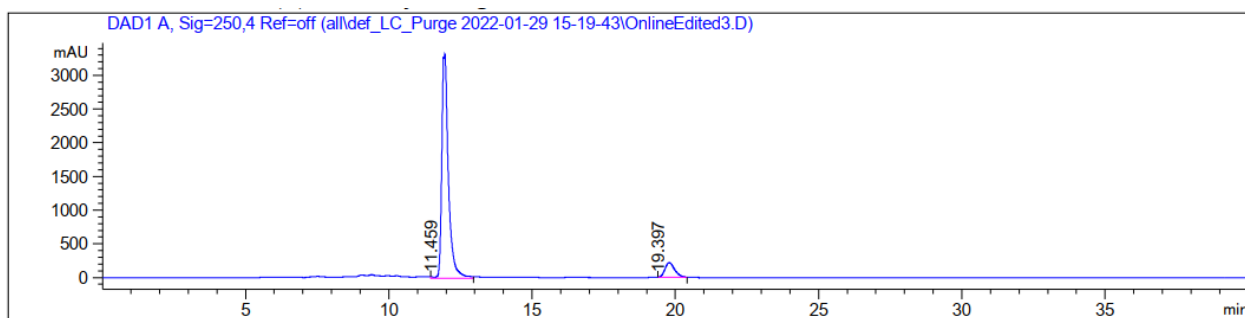

Signal 1: DAD1 A, Sig=250,4 Ref=off

| Peak # | RetTime [min] | Type | Width [min] | Area [mAU*s] | Height [mAU] | Area %  |
|--------|---------------|------|-------------|--------------|--------------|---------|
| 1      | 11.459        | MM R | 0.2670      | 5.33499e4    | 16.81886     | 91.2849 |
| 2      | 19.397        | MM R | 0.3894      | 5093.37500   | 1.11502      | 8.7151  |

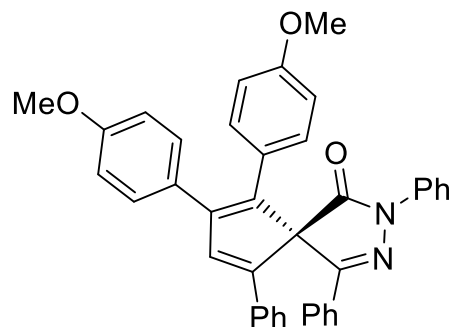

**6,7-Bis(4-methoxyphenyl)-2,4,9-triphenyl-2,3-diazaspiro[4.4]nona-3,6,8-trien-1-one (*rac*-**4d**)**

The general procedure **B** was followed using 2,5-diphenyl-4-(1-phenylethylidene)-2,4-dihydro-3H-pyrazol-3-one (**1b**) (51.0 mg, 0.15 mmol) and 1,2-bis(4-methoxyphenyl)ethyne (24.0 mg, 0.10 mmol). Purification by column chromatography (*n*-hexane/EtOAc=10:1) yielded *rac*-**4d** (38 mg, 66%), as a yellow solid.

**(S)-6,7-bis(4-methoxyphenyl)-2,4,9-triphenyl-2,3-diazaspiro[4.4]nona-3,6,8-trien-1-one (**4d'**)**

The general procedure **C** was followed using 2,5-diphenyl-4-(1-phenylethylidene)-2,4-dihydro-3H-pyrazol-3-one (**1b**) (51.0 mg, 0.15 mmol) and 1,2-bis(4-methoxyphenyl)ethyne (24.0 mg, 0.10 mmol). Purification by column chromatography (*n*-hexane/EtOAc=10:1) yielded **4d'** (28 mg, 48%), as a yellow solid.

**<sup>1</sup>H NMR** (400 MHz, CDCl<sub>3</sub>): δ = 7.92 – 7.84 (m, 2H), 7.81 – 7.71 (m, 2H), 7.55 (s, 1H), 7.46 – 7.38 (m, 2H), 7.36 – 7.28 (m, 7H), 7.25 – 7.13 (m, 4H), 6.96 – 6.90 (m, 2H), 6.86 – 6.78 (m, 2H), 6.68 – 6.61 (m, 2H), 3.80 (s, 3H), 3.69 (s, 3H).

**<sup>13</sup>C NMR** (101 MHz, CDCl<sub>3</sub>): δ = 169.7 (C<sub>q</sub>), 159.2 (C<sub>q</sub>), 159.1 (C<sub>q</sub>), 156.5 (C<sub>q</sub>), 144.7 (C<sub>q</sub>), 144.4 (C<sub>q</sub>), 138.6 (C<sub>q</sub>), 138.0 (C<sub>q</sub>), 135.5 (CH), 133.4 (C<sub>q</sub>), 131.1 (C<sub>q</sub>), 130.7 (CH), 130.0 (CH), 129.7 (CH), 129.0 (CH), 128.9 (CH), 128.8 (CH), 127.9 (CH), 127.0 (C<sub>q</sub>), 126.1 (C<sub>q</sub>), 125.8 (CH), 125.6 (CH), 125.1 (CH), 119.7 (CH), 114.0 (CH), 113.8 (CH), 76.5 (C<sub>q</sub>), 55.2 (CH<sub>3</sub>), 55.0 (CH<sub>3</sub>).

**IR** (ATR):  $\tilde{\nu}$  = 1712, 1595, 1499, 1245, 1176, 1026, 833, 731, 688 cm<sup>-1</sup>.

**MS** (ESI) *m/z* (relative intensity): 575 (60) [M+H]<sup>+</sup>, 597 (100) [M+Na]<sup>+</sup>.

**HR-MS** (ESI): *m/z* calcd for C<sub>39</sub>H<sub>31</sub>N<sub>2</sub>O<sub>3</sub><sup>+</sup> [M+H]<sup>+</sup>: 575.2335, found: 575.2329.

**HPLC separation** (Chiralpak® IE-3, MeOH/*i*-PrOH 90:10, 0.5 mL/min, detection at 250 nm): tr (major) = 12.5 min, tr (minor) = 24.2 min, 91 : 9 er.

[α]<sub>D</sub><sup>20</sup>: -32.0 (c = 0.1, CHCl<sub>3</sub>)

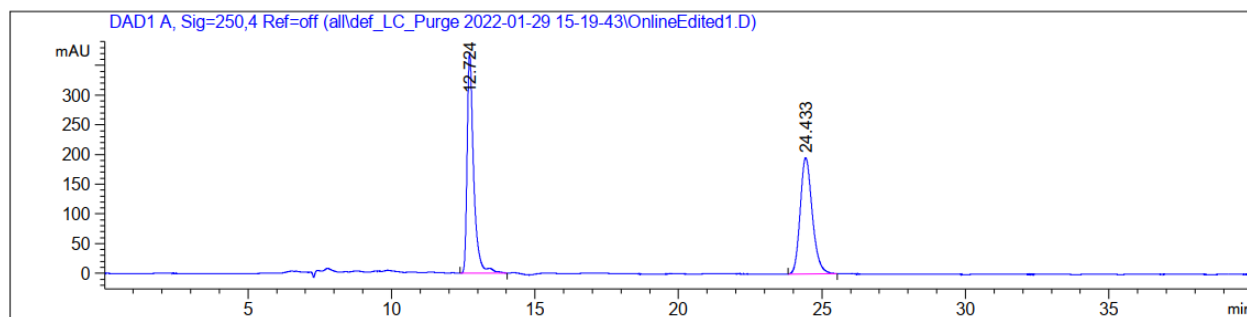

Signal 1: DAD1 A, Sig=250,4 Ref=off

| Peak # | RetTime [min] | Type | Width [min] | Area [mAU*s] | Height [mAU] | Area %  |
|--------|---------------|------|-------------|--------------|--------------|---------|
| 1      | 12.724        | BV R | 0.2296      | 5849.47314   | 371.37332    | 50.4886 |
| 2      | 24.433        | BV R | 0.4417      | 5736.25977   | 195.83238    | 49.5114 |

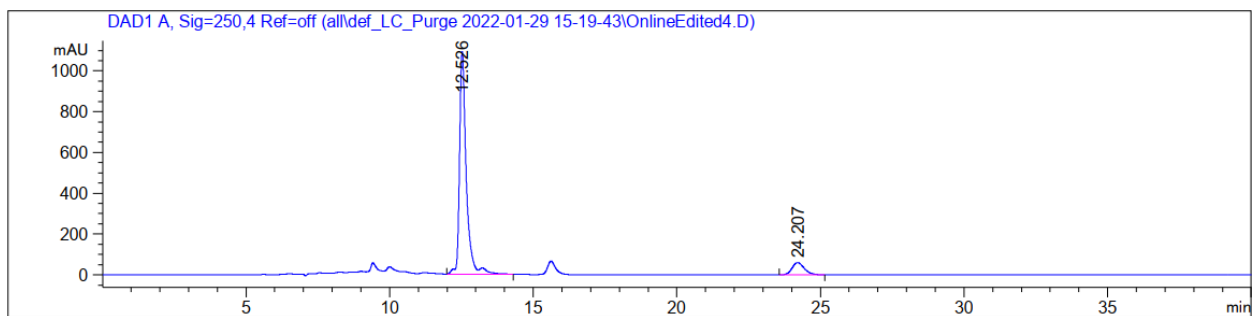

Signal 1: DAD1 A, Sig=250,4 Ref=off

| Peak # | RetTime [min] | Type | Width [min] | Area [mAU*s] | Height [mAU] | Area %  |
|--------|---------------|------|-------------|--------------|--------------|---------|
| 1      | 12.526        | VV R | 0.2323      | 1.78537e4    | 1090.65503   | 90.9879 |
| 2      | 24.207        | BV R | 0.3808      | 1768.36438   | 60.01177     | 9.0121  |

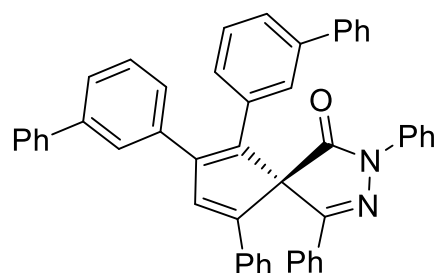

**6,7-Di([1,1'-biphenyl]-3-yl)-2,4,9-triphenyl-2,3-diazaspiro[4.4]nona-3,6,8-trien-1-one (*rac*-**4e**)**

The general procedure **B** was followed using 2,5-diphenyl-4-(1-phenylethylidene)-2,4-dihydro-3H-pyrazol-3-one (**1b**) (51.0 mg, 0.15 mmol) and 1,2-di([1,1'-biphenyl]-3-yl)ethyne (33.0 mg, 0.10 mmol). Purification by column chromatography (*n*-hexane/EtOAc=10:1) yielded **rac-4e** (30 mg, 44%), as a yellow solid.

**(S)-6,7-di([1,1'-biphenyl]-3-yl)-2,4,9-triphenyl-2,3-diazaspiro[4.4]nona-3,6,8-trien-1-one (**4e'**)**

The general procedure **C** was followed using 2,5-diphenyl-4-(1-phenylethylidene)-2,4-dihydro-3H-pyrazol-3-one (**1b**) (51.0 mg, 0.15 mmol) and 1,2-di([1,1'-biphenyl]-3-yl)ethyne (33.0 mg, 0.10 mmol). Purification by column chromatography (*n*-hexane/EtOAc=10:1) yielded **4e'** (34 mg, 51%), as a yellow solid.

**<sup>1</sup>H NMR** (400 MHz, CDCl<sub>3</sub>):  $\delta$  = 7.95 (d, *J* = 8.2 Hz, 2H), 7.90 – 7.80 (m, 2H), 7.70 – 7.65 (m, 2H), 7.53 (d, *J* = 7.6 Hz, 1H), 7.49 – 7.28 (m, 19H), 7.30 – 7.16 (m, 7H), 7.03 (d, *J* = 7.8 Hz, 1H).

**<sup>13</sup>C NMR** (101 MHz, CDCl<sub>3</sub>):  $\delta$  = 169.2 (C<sub>q</sub>), 156.3 (C<sub>q</sub>), 145.6 (C<sub>q</sub>), 145.5 (C<sub>q</sub>), 141.4 (C<sub>q</sub>), 141.3 (C<sub>q</sub>), 140.6 (C<sub>q</sub>), 140.4 (C<sub>q</sub>), 137.9 (C<sub>q</sub>), 135.1 (CH), 134.7 (C<sub>q</sub>), 134.1 (C<sub>q</sub>), 133.2 (C<sub>q</sub>), 131.1 (CH), 130.8 (CH), 129.1 (CH), 129.1 (CH), 128.9 (CH), 128.9 (CH), 128.7 (CH), 128.5 (CH), 128.2 (CH), 127.8 (CH), 127.6 (CH), 127.4 (CH), 127.4 (CH), 127.2 (CH), 127.0 (CH), 126.9 (CH), 126.8 (CH), 125.8 (CH), 125.7 (CH), 125.2 (CH), 119.6 (CH), 76.6 (C<sub>q</sub>).

**IR** (ATR):  $\tilde{\nu}$  = 1713, 1595, 1492, 1300, 1136, 756, 734, 687 cm<sup>-1</sup>.

**MS** (ESI) *m/z* (relative intensity): 667 (40) [M+H]<sup>+</sup>, 689 (100) [M+Na]<sup>+</sup>.

**HR-MS** (ESI): *m/z* calcd for C<sub>49</sub>H<sub>35</sub>N<sub>2</sub>O<sup>+</sup> [M+H]<sup>+</sup>: 667.2749, found: 667.2744.

**HPLC separation** (Chiralpak® IE-3, MeOH/*i*-PrOH 90:10, 0.5 mL/min, detection at 250 nm): tr (major) = 12.9 min, tr (minor) = 20.9 min, 95 : 5 er.

[ $\alpha$ ]<sub>D</sub><sup>20</sup>: -20.0 (c = 0.1, CHCl<sub>3</sub>)

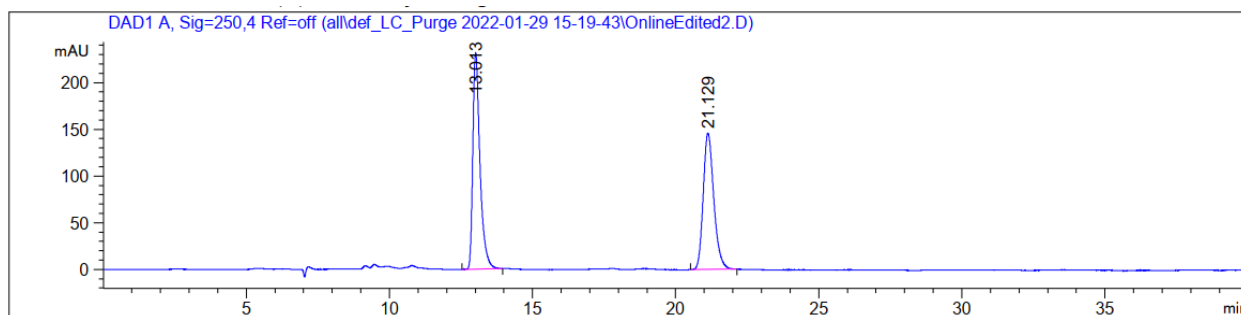

Signal 1: DAD1 A, Sig=250,4 Ref=off

| Peak # | RetTime [min] | Type | Width [min] | Area [mAU*s] | Height [mAU] | Area %  |
|--------|---------------|------|-------------|--------------|--------------|---------|
| 1      | 13.013        | VV R | 0.2619      | 4027.20850   | 231.54088    | 51.7281 |
| 2      | 21.129        | BV R | 0.3829      | 3758.13354   | 146.21333    | 48.2719 |

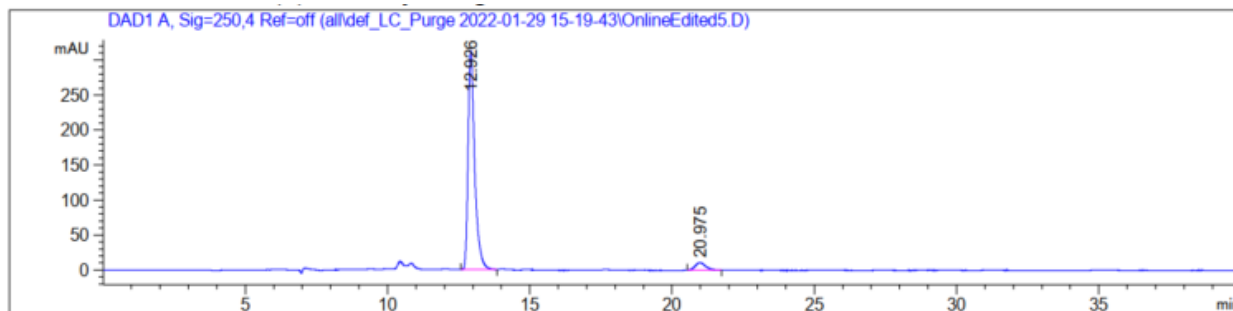

Signal 1: DAD1 A, Sig=250,4 Ref=off

| Peak # | RetTime [min] | Type | Width [min] | Area [mAU*s] | Height [mAU] | Area %  |
|--------|---------------|------|-------------|--------------|--------------|---------|
| 1      | 12.926        | BB   | 0.2395      | 5026.89600   | 312.76038    | 94.7369 |
| 2      | 20.975        | BV R | 0.3087      | 279.26837    | 10.69275     | 5.2631  |

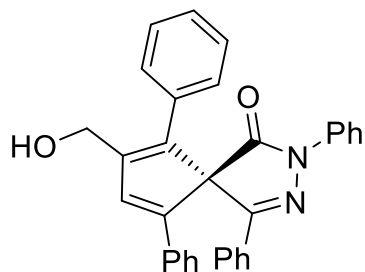

**7-(Hydroxymethyl)-2,4,6,9-tetraphenyl-2,3-diazaspiro[4.4]nona-3,6,8-trien-1-one (*rac*-4f)**

The general procedure **B** was followed using 2,5-diphenyl-4-(1-phenylethylidene)-2,4-dihydro-3H-pyrazol-3-one (**1b**) (51.0 mg, 0.15 mmol) and 3-phenylprop-2-yn-1-ol (13.0 mg, 0.10 mmol). Purification by column chromatography (*n*-hexane/EtOAc=10:1) yielded **rac**-4f (41 mg, 90%), as a yellow solid.

**<sup>1</sup>H NMR** (400 MHz, CDCl<sub>3</sub>): δ = 7.88 (d, *J* = 8.2 Hz, 2H), 7.70 (d, *J* = 7.3 Hz, 2H), 7.50 (s, 1H), 7.40 (t, *J* = 7.8 Hz, 2H), 7.33 – 7.09 (m, 12H), 7.03 (dd, *J* = 7.3, 1.9 Hz, 2H), 4.55 (q, *J* = 13.1 Hz, 2H), 3.17 (s, 1H).

**<sup>13</sup>C NMR** (101 MHz, CDCl<sub>3</sub>): δ = 169.8 (C<sub>q</sub>), 156.8 (C<sub>q</sub>), 146.7 (C<sub>q</sub>), 145.5 (C<sub>q</sub>), 142.0 (C<sub>q</sub>), 137.8 (C<sub>q</sub>), 134.4 (CH), 133.1 (C<sub>q</sub>), 132.2 (C<sub>q</sub>), 130.8 (CH), 130.7 (C<sub>q</sub>), 129.0 (CH), 128.9 (CH), 128.8 (CH), 128.5 (CH), 128.3 (CH), 128.3 (CH), 128.0 (CH), 125.9 (CH), 125.8 (CH), 125.0 (CH), 119.7 (CH), 75.7 (C<sub>q</sub>), 58.2 (CH<sub>2</sub>).

**IR** (ATR):  $\tilde{\nu}$  = 3053, 1715, 1688, 1493, 1444, 1318, 1301, 1137, 755, 688 cm<sup>-1</sup>.

**MS** (ESI) *m/z* (relative intensity): 469 (100) [M+H]<sup>+</sup>.

**HR-MS** (ESI): *m/z* calcd for C<sub>32</sub>H<sub>25</sub>N<sub>2</sub>O<sub>2</sub><sup>+</sup> [M+H]<sup>+</sup>: 4669.1619, found: 469.1619.

The analytical data are in accordance with those reported in the literature.<sup>6</sup>

## Mechanistic Investigations

### Catalytic cycle for palladaelectro-catalyzed spiroannulation

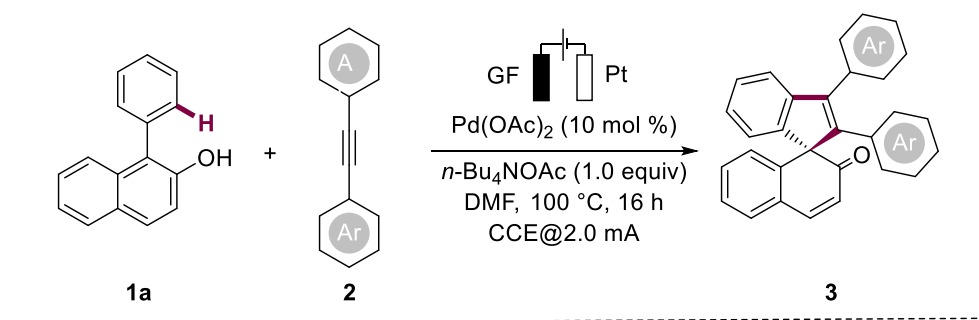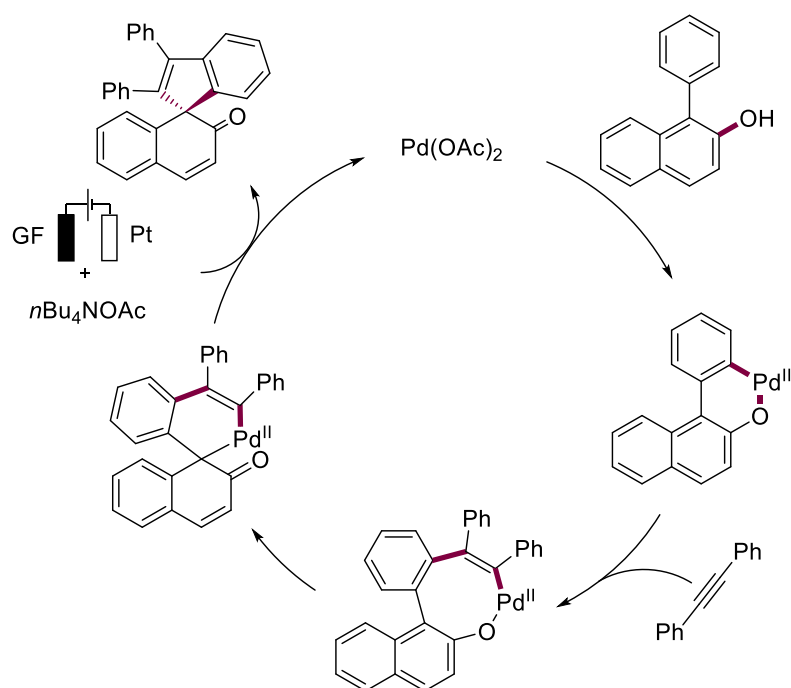



## Catalytic cycle for rhodaelectro-catalyzed spiroannulation

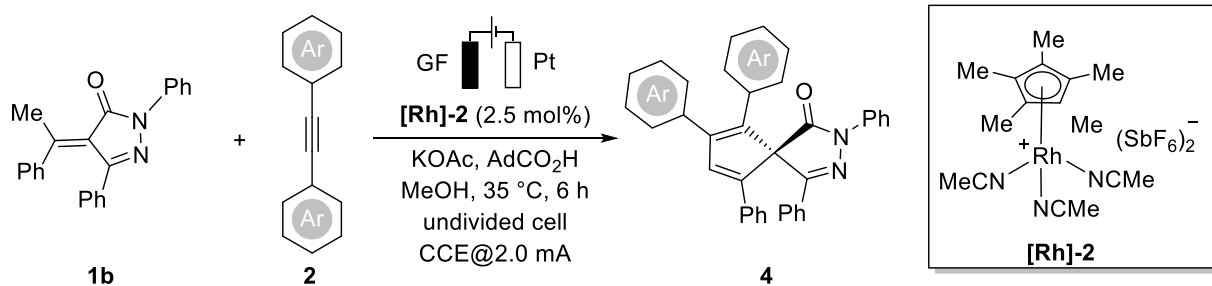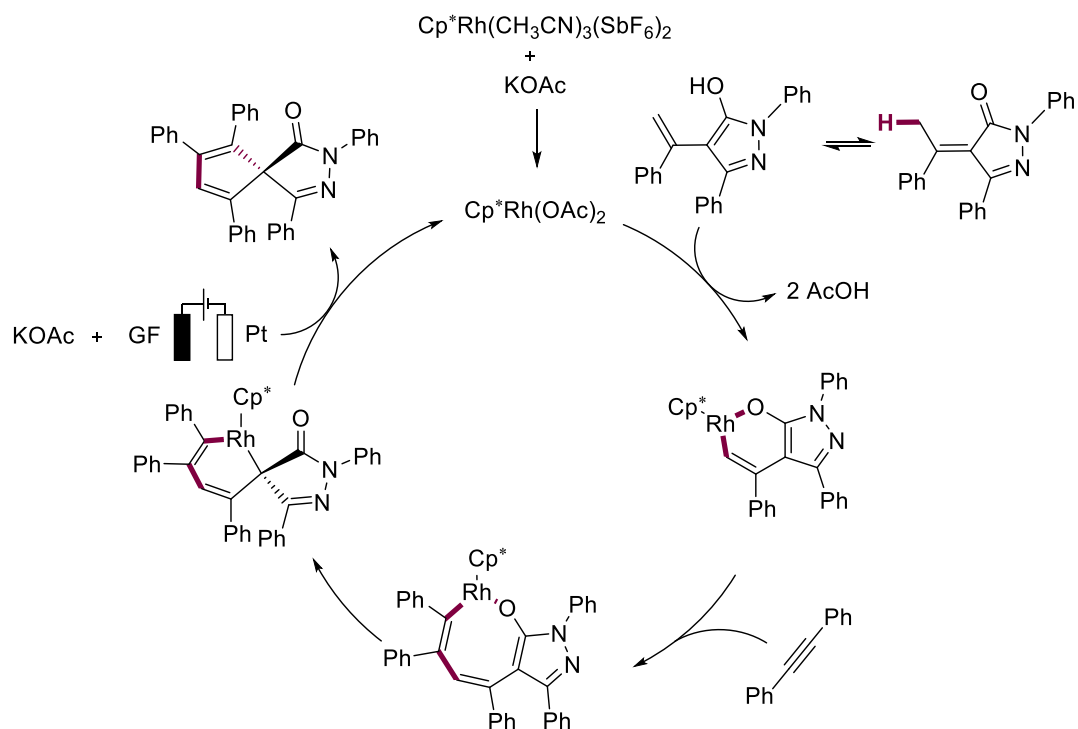

## KIE Experiment

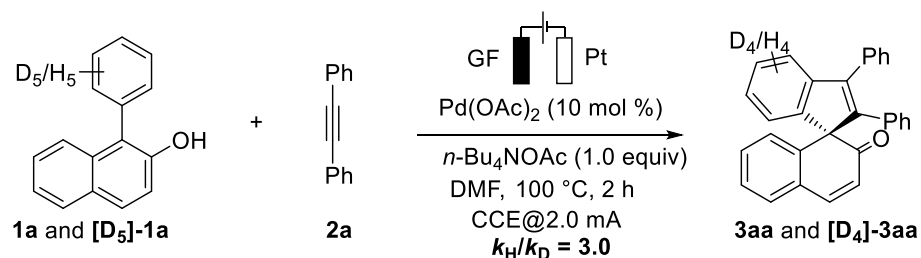

The electrocatalysis was carried out in an undivided cell under air with a graphite felt (GF) anode (10 mm × 15 mm × 6 mm) and a platinum cathode (10 mm × 15 mm × 0.25 mm). 1-phenylnaphthalen-2-ol (**1a**) (88.0 mg, 0.40 mmol), [D<sub>5</sub>]-**1a** (88.0 mg, 0.40 mmol), 1,2-diphenylethyne (**2a**) (71.0 mg, 0.40 mmol), and *n*-Bu<sub>4</sub>NOAc (0.40 mmol, 1.0 equiv) were dissolved in DMF (4.0 mL). Electrocatalysis was performed at 100 °C with a constant current of 2.0 mA maintained for 2 h. The GF anode was washed with CH<sub>2</sub>Cl<sub>2</sub> (3×10 mL). Evaporation of the solvent and subsequent purification by column chromatography on silica gel with EtOAc/*n*-hexane (5/1) afforded the corresponding products **3aa** and [D<sub>4</sub>]-**3aa** in 31% yield (49.0 mg). The H/D incorporation in **3aa**/[D<sub>4</sub>]-**3aa** was determined by <sup>1</sup>H NMR spectroscopy. The kinetic isotopic effect of this reaction was determined to be  $k_{\text{H}}/k_{\text{D}} = 3.0$ .

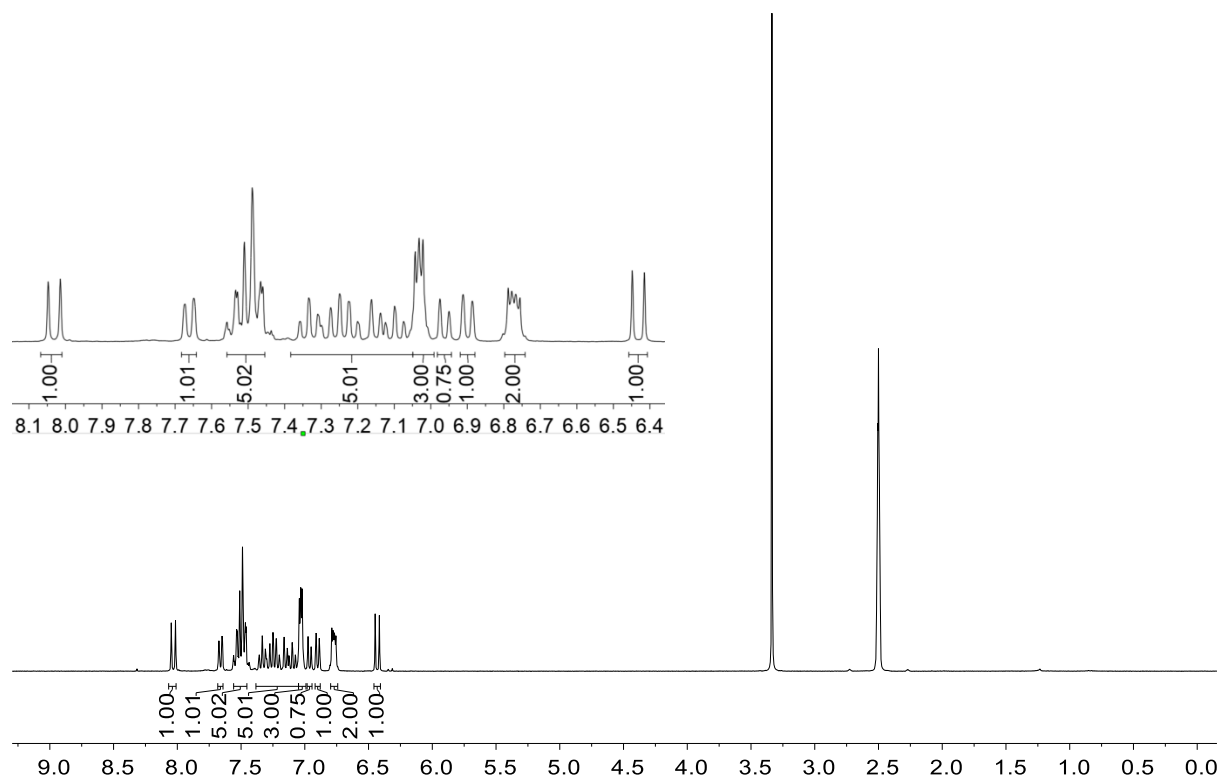

## H/D Exchange experiment

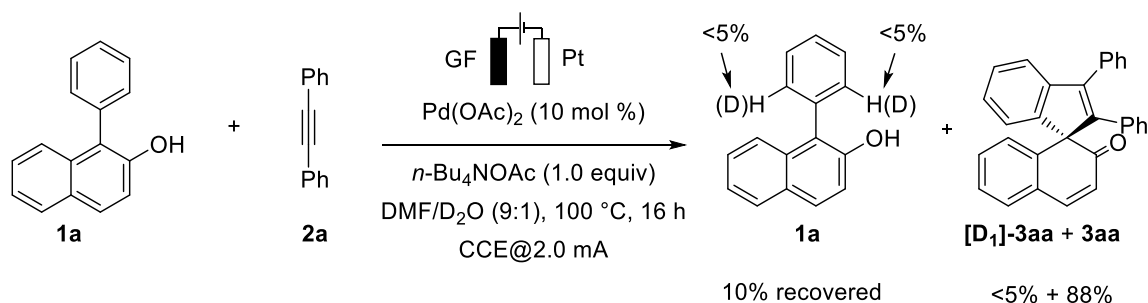

The electrocatalysis was carried out in an undivided cell under air, with a graphite felt (GF) anode (10 mm × 15 mm × 6 mm) and a platinum cathode (10 mm × 15 mm × 0.25 mm). 1-Phenylnaphthalen-2-ol (**1a**) (176.0 mg, 0.80 mmol), 1,2-diphenylethyne (**2a**) (70.0 mg, 0.40 mmol), and  $n\text{-Bu}_4\text{NOAc}$  (0.40 mmol, 1.0 equiv) were dissolved in DMF (3.6 mL) and  $\text{H}_2\text{O}$  (0.4 mL). Electrocatalysis was performed at  $100^\circ\text{C}$  with a constant current of 2.0 mA maintained for 16 h. The GF anode was washed with  $\text{CH}_2\text{Cl}_2$  (3×30 mL). Evaporation of the solvent and subsequent purification by column chromatography on silica gel with  $\text{EtOAc}/n\text{-hexane}$  (5/1) afforded the corresponding products **3aa** in 88% yield and  $^1\text{H}$  NMR spectroscopy showed that no detectable deuterium was observed.

### Gram-scale preparation of **3aa**

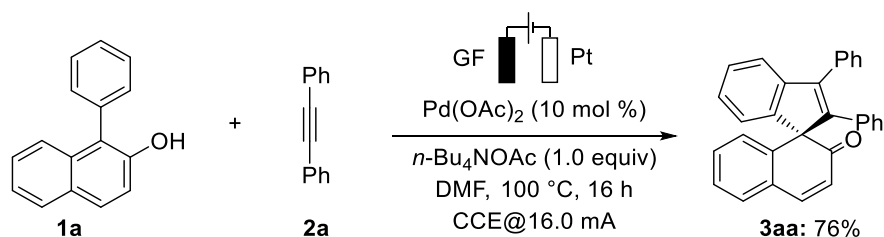

The electrocatalysis was carried out in an undivided cell under air with a graphite felt (GF) anode (25 mm × 50 mm × 6 mm) and a platinum cathode (25 mm × 50 mm × 0.25 mm). 1-Phenylnaphthalen-2-ol (**1a**) (1.50 g, 6.4 mmol), 1,2-diphenylethyne (**2a**) (570 mg, 3.2 mmol), and  $n\text{-Bu}_4\text{NOAc}$  (3.2 mmol, 1.0 equiv) were dissolved in DMF (32.0 mL). Electrocatalysis was performed at 100 °C with a constant current of 16.0 mA maintained for 16 h. The GF anode was washed with  $\text{CH}_2\text{Cl}_2$  (3×30 mL). Evaporation of the solvent and subsequent purification by column chromatography on silica gel with  $\text{EtOAc}/n\text{-hexane}$  (5/1) afforded the corresponding product **3aa** in 76% yield (960 mg).

### Cyclic Voltammetry Studies

CV measurements were conducted with a Metrohm Autolab PGSTAT204 potentiostat and Nova 2.1 software. A glassy carbon working electrode (disk, diameter: 3mm), a coiled platinum wire counter electrode and a non-aqueous Ag-wire/ferrocene reference electrode were employed. The voltammograms were recorded at room temperature in DMF at a substrate concentration of 5.0 mmol/L and with 100 mmol/L TBAOAc as supporting electrolyte. All solutions were degassed with N<sub>2</sub> prior to the measurement and an overpressure of protective gas was maintained throughout the experiment. The scan rate is 100 mV/s. Deviations from the general experimental conditions are indicated in the respective figures and descriptions.

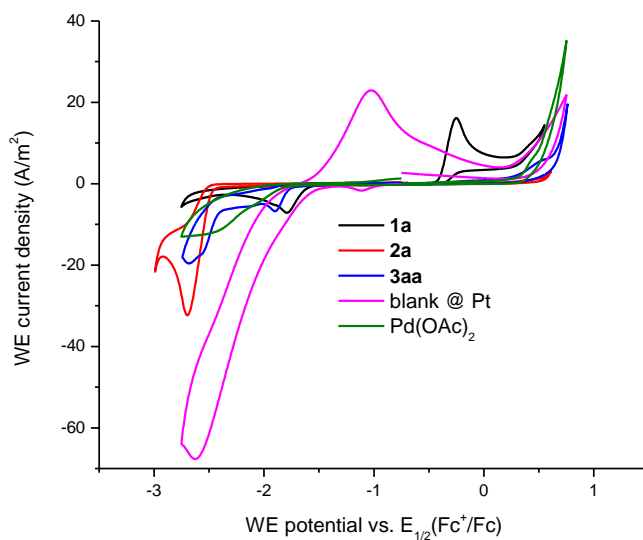

**Figure S1.** Cyclic voltammetry of the reactants and product **3aa** in DMF.

## References

1. J. Nan, Z. Zuo, L. Luo, L. Bai, H. Zheng, Y. Yuan, J. Liu, X. Luan and Y. Wang, *J. Am. Chem. Soc.*, 2013, **135**, 17306-17309.
2. L. Han, H. Wang and X. Luan, *Org. Chem. Front.*, 2018, **5**, 2453-2457.
3. H. Zheng, L. Bai, J. Liu, J. Nan, Z. Zuo, L. Yang, Y. Wang and X. Luan, *Chem. Commun.*, 2015, **51**, 3061-3064.
4. J. Wu, L. Bai, L. Han, J. Liu and X. Luan, *Chem. Commun.*, 2021, **57**, 1117-1120.
5. Y.-Q. Huang, Z.-J. Wu, L. Zhu, Q. Gu, X. Lu, S.-L. You and T.-S. Mei, *CCS Chem.*, 2021, **3**, 3501-3509.
6. H. Li, R. Gontla, J. Flegel, C. Merten, S. Ziegler, A. P. Antonchick and H. Waldmann, *Angew. Chem. Int. Ed.*, 2019, **58**, 307-311.

# <sup>1</sup>H, <sup>13</sup>C and <sup>19</sup>F NMR Spectra

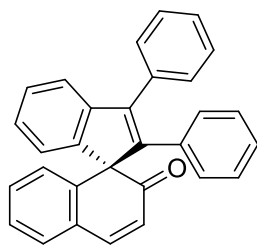

**3aa**  
(CDCl<sub>3</sub>, 300 MHz)

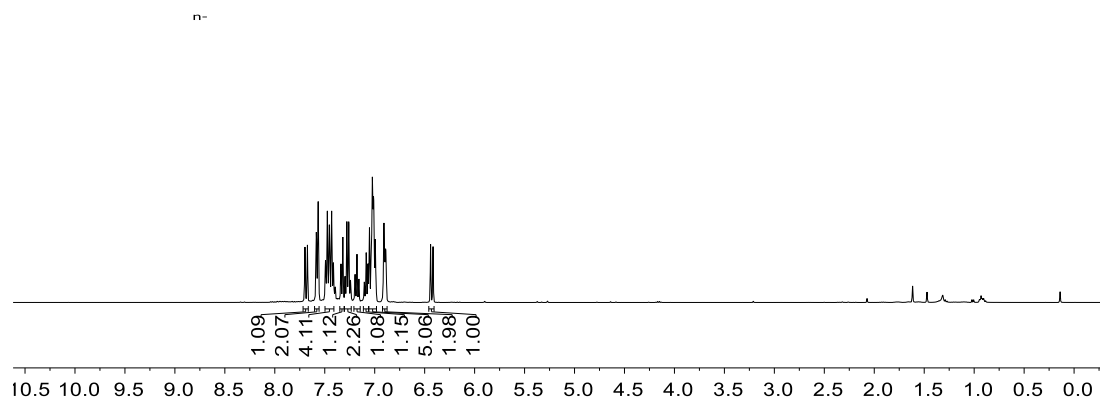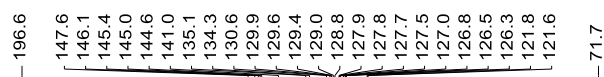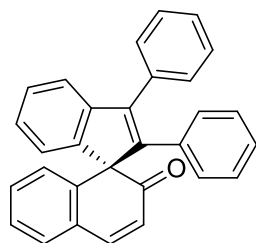

**3aa**  
(CDCl<sub>3</sub>, 101 MHz)

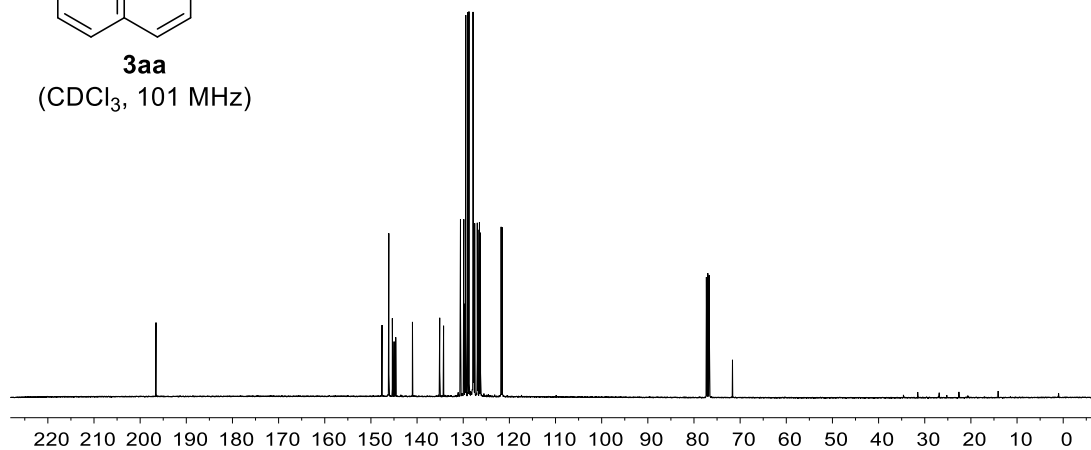



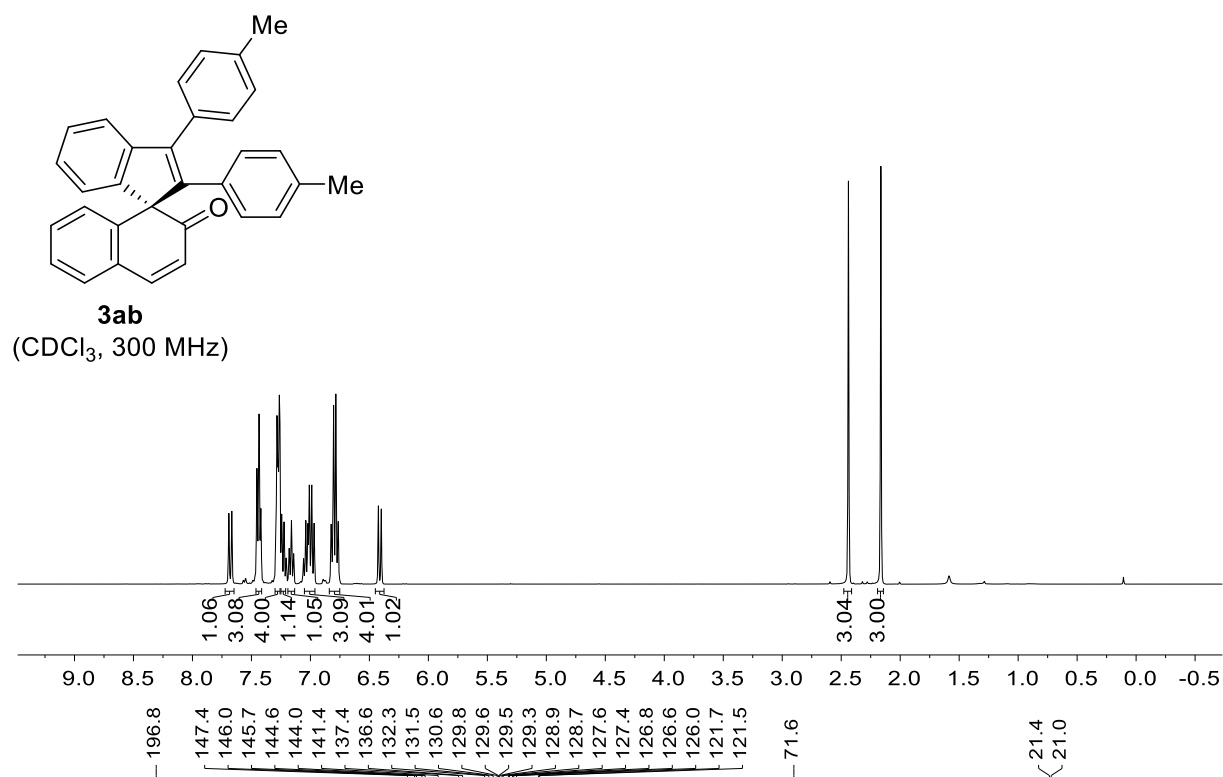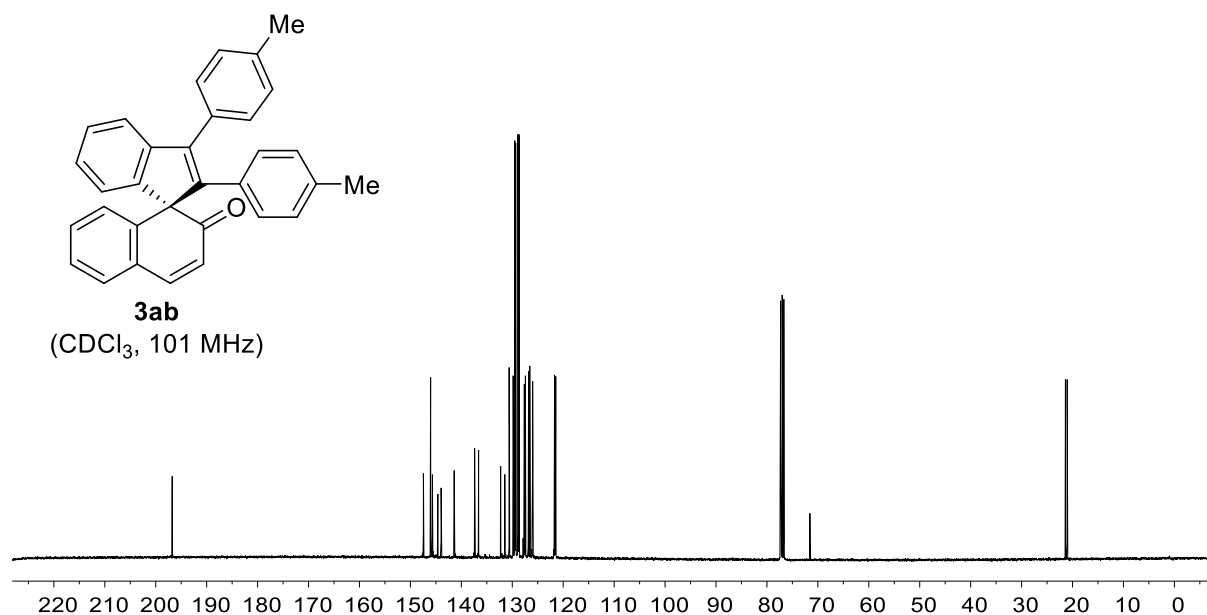

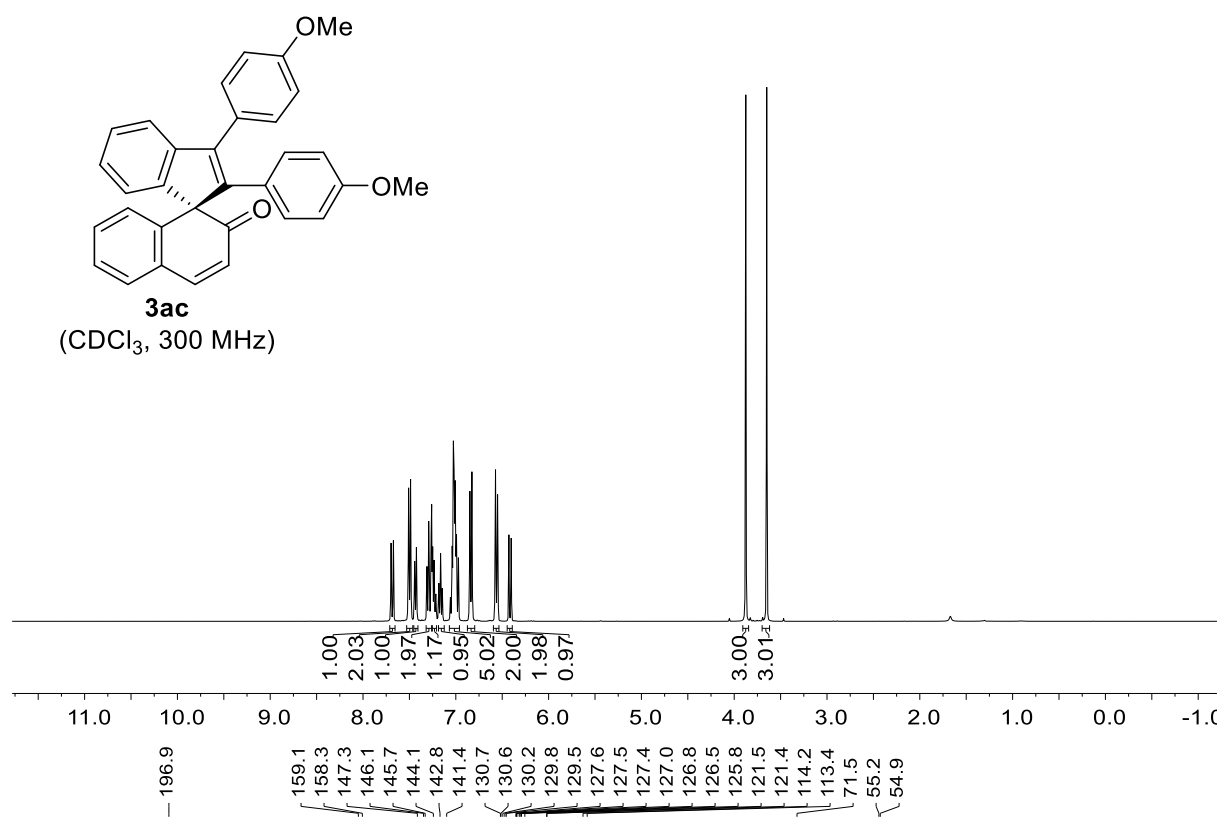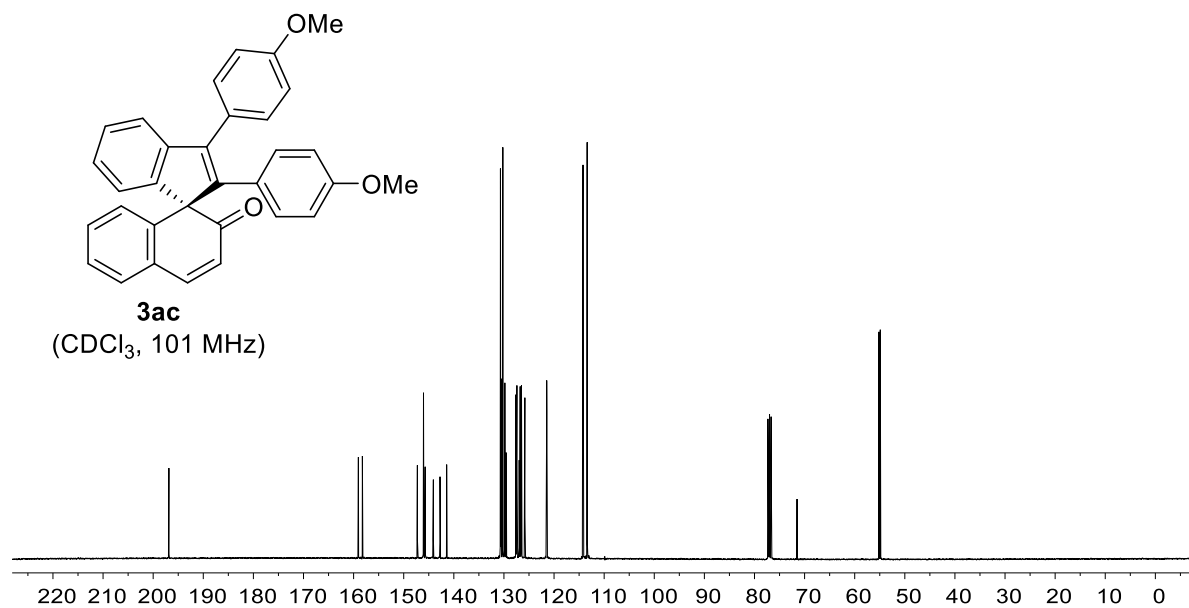

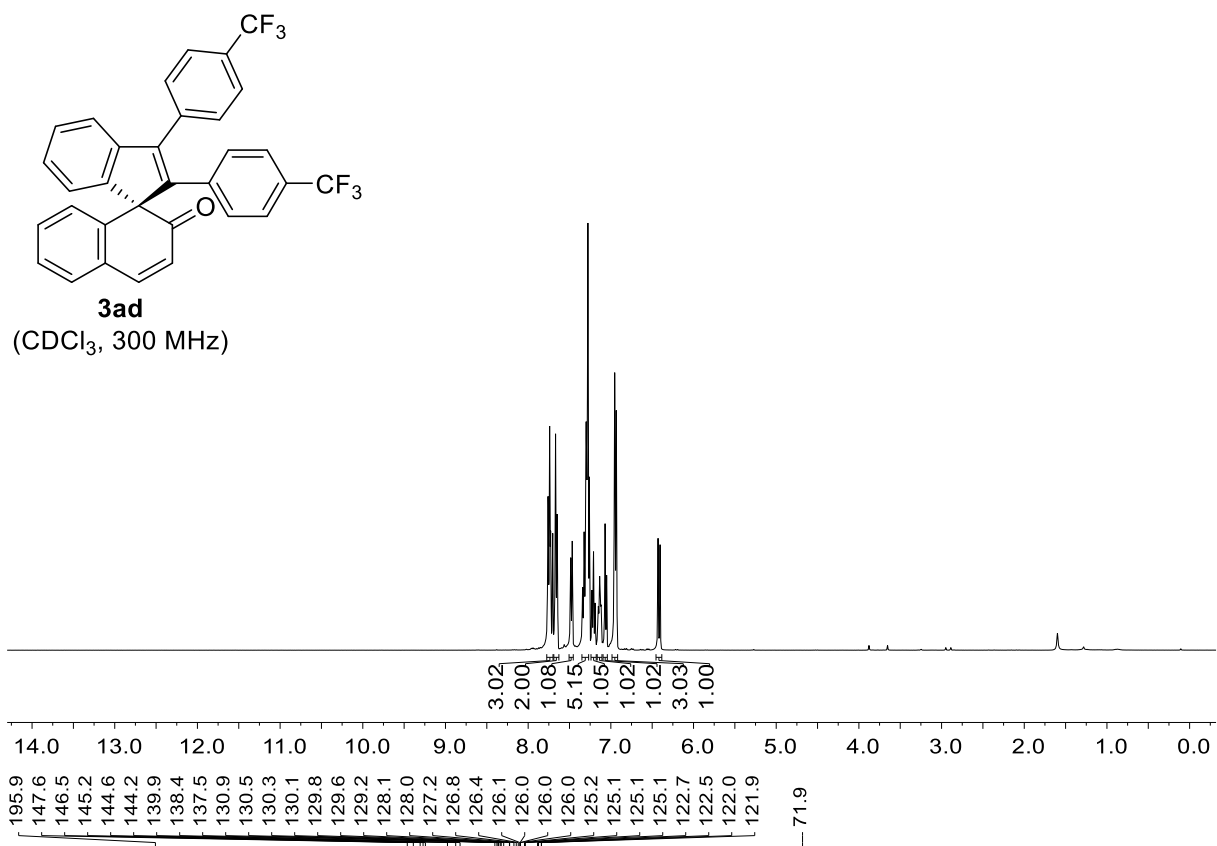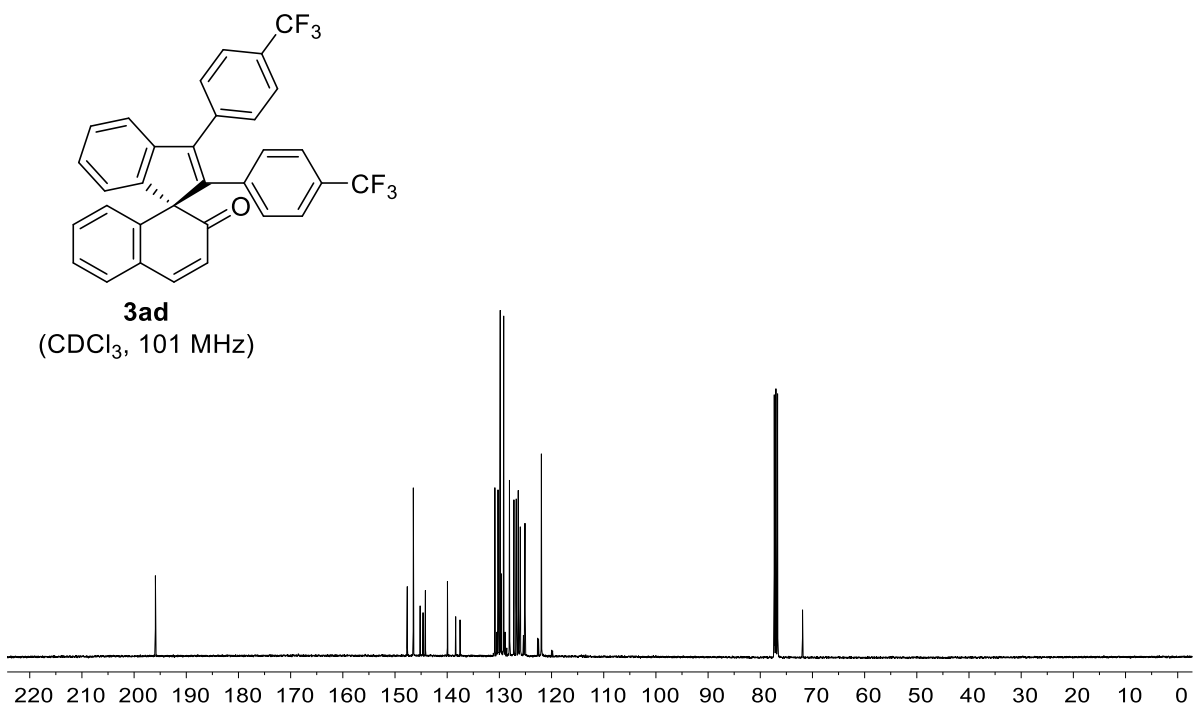

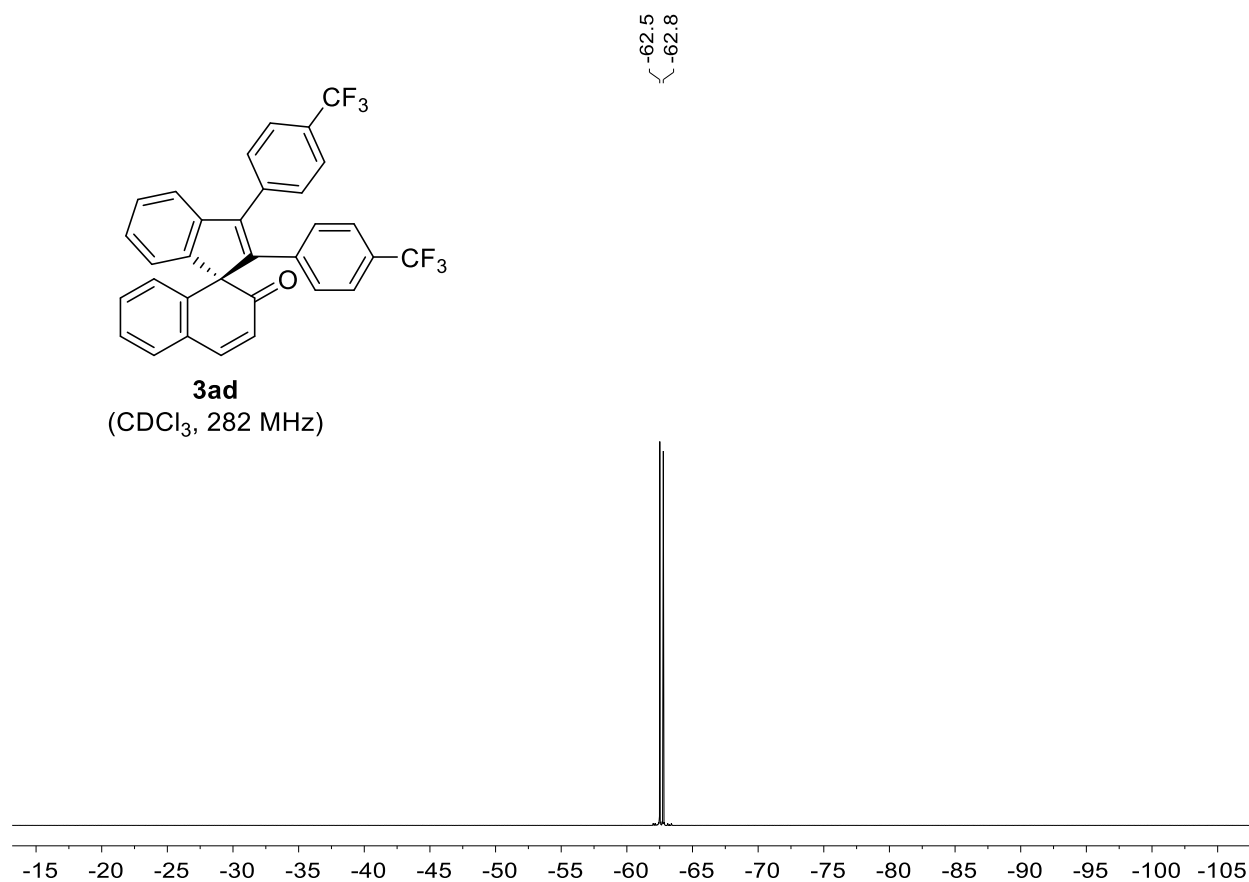

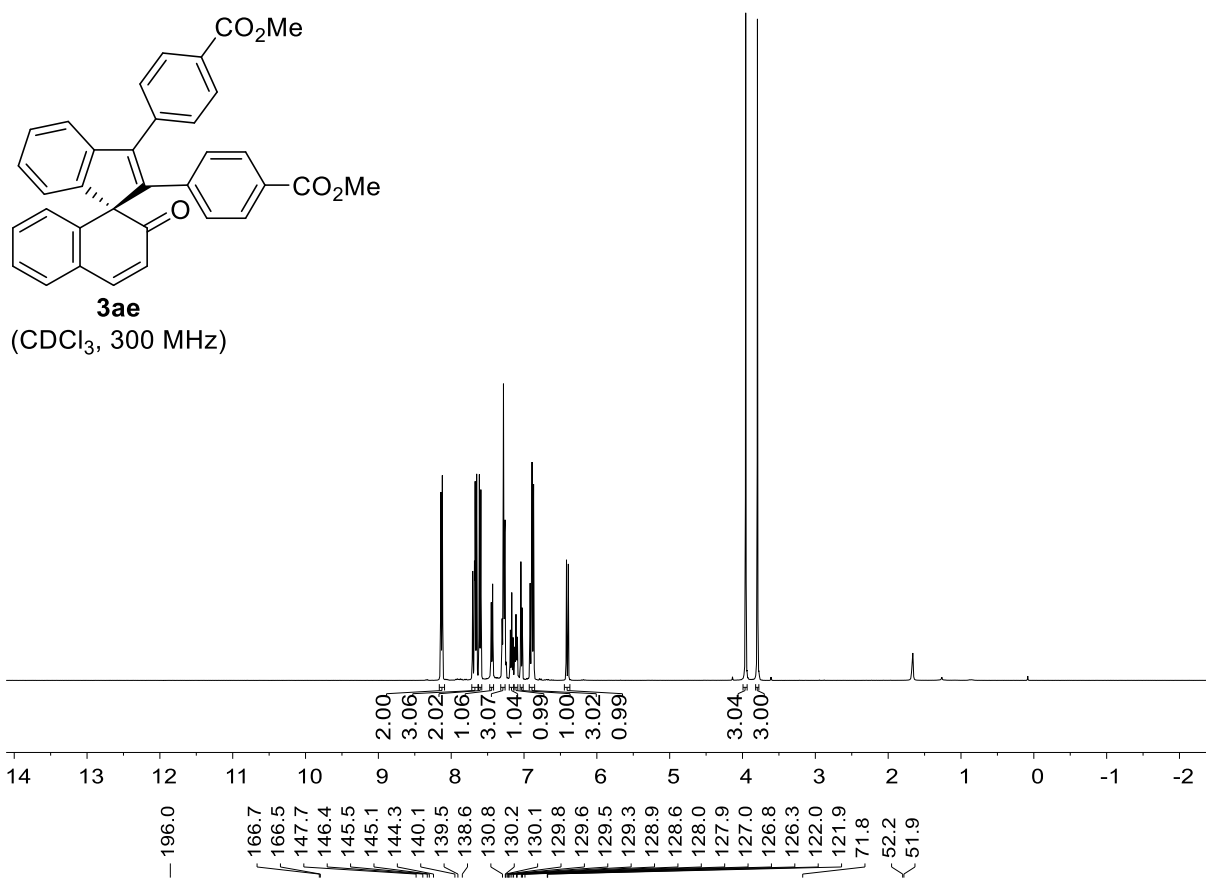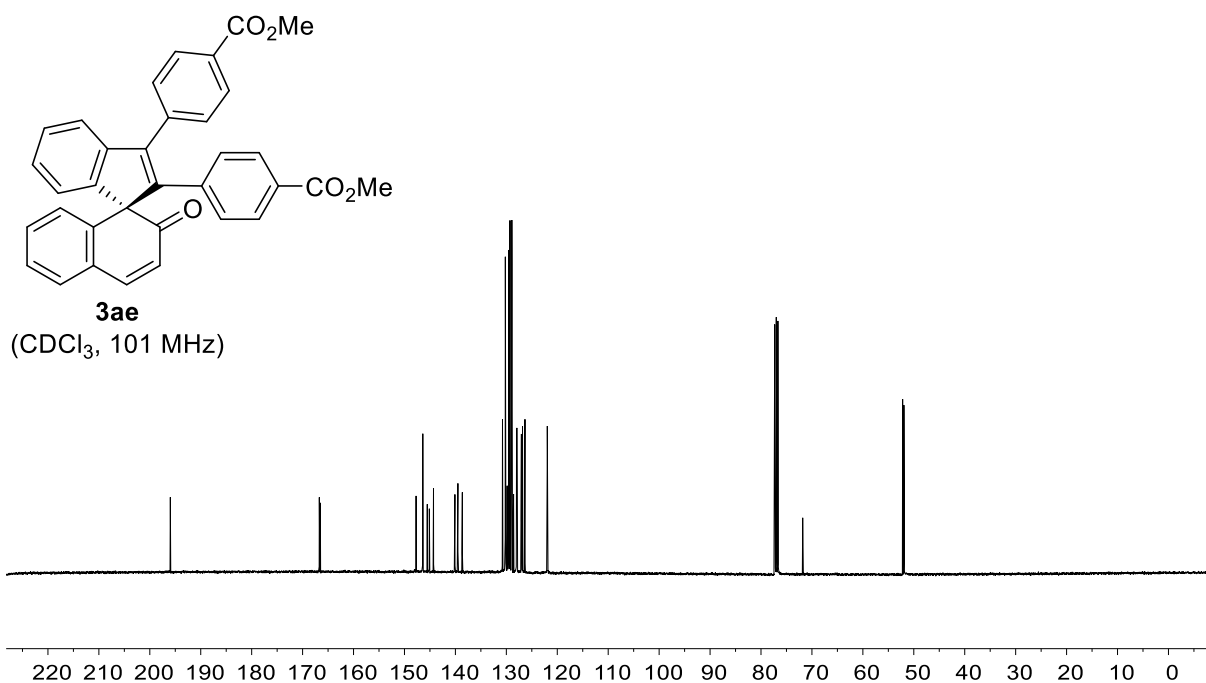

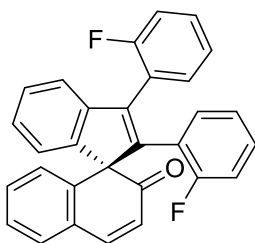

**3af**  
(CDCl<sub>3</sub>, 300 MHz)

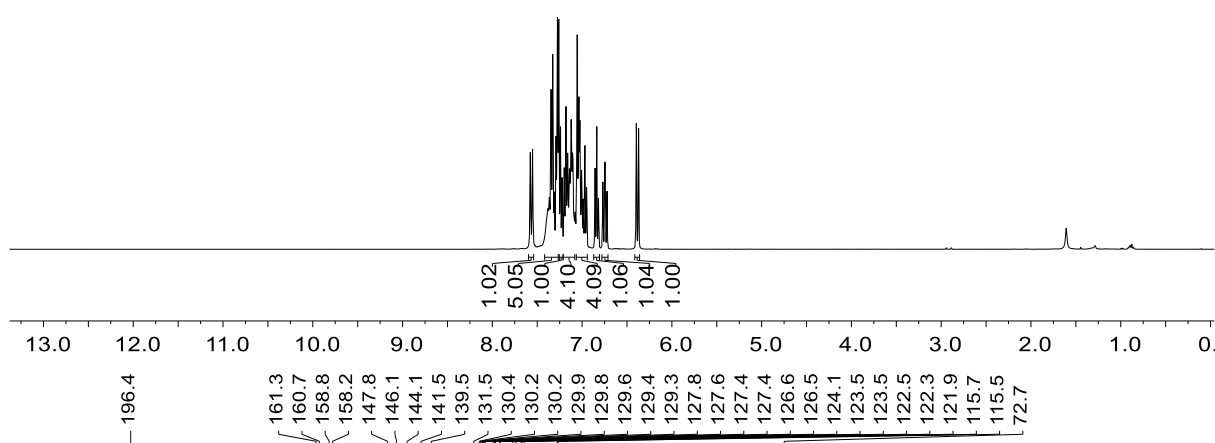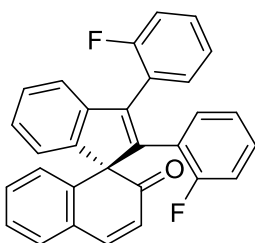

**3af**  
(CDCl<sub>3</sub>, 101 MHz)

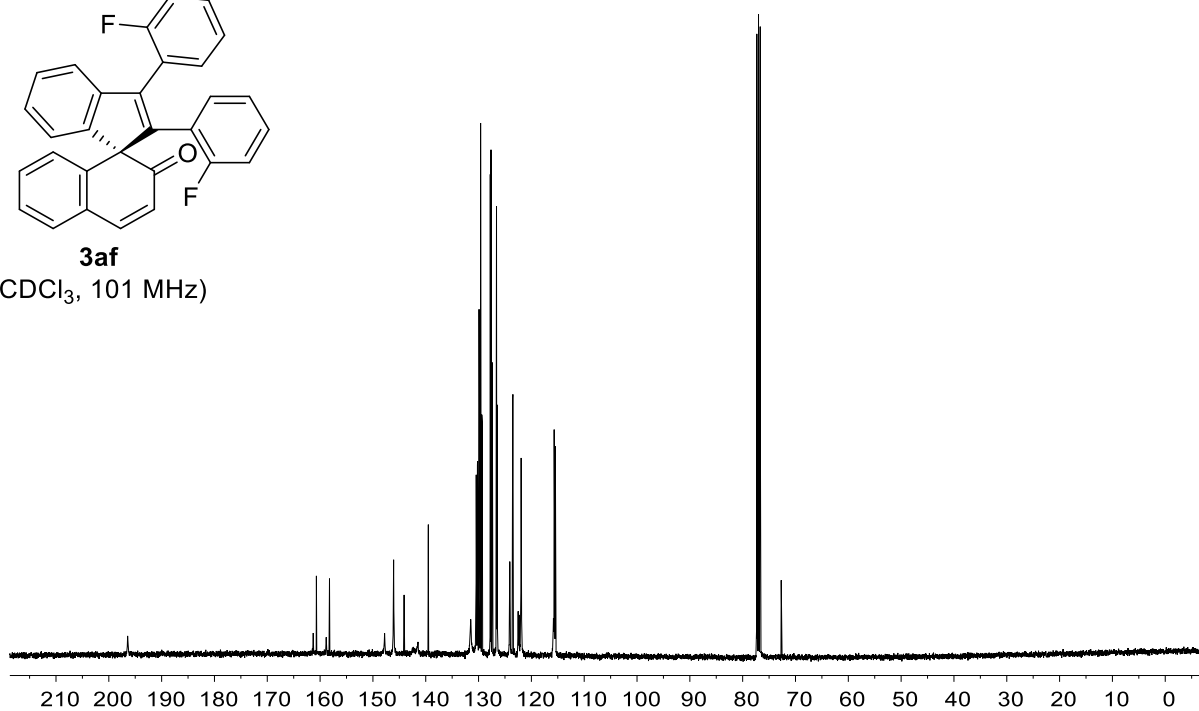

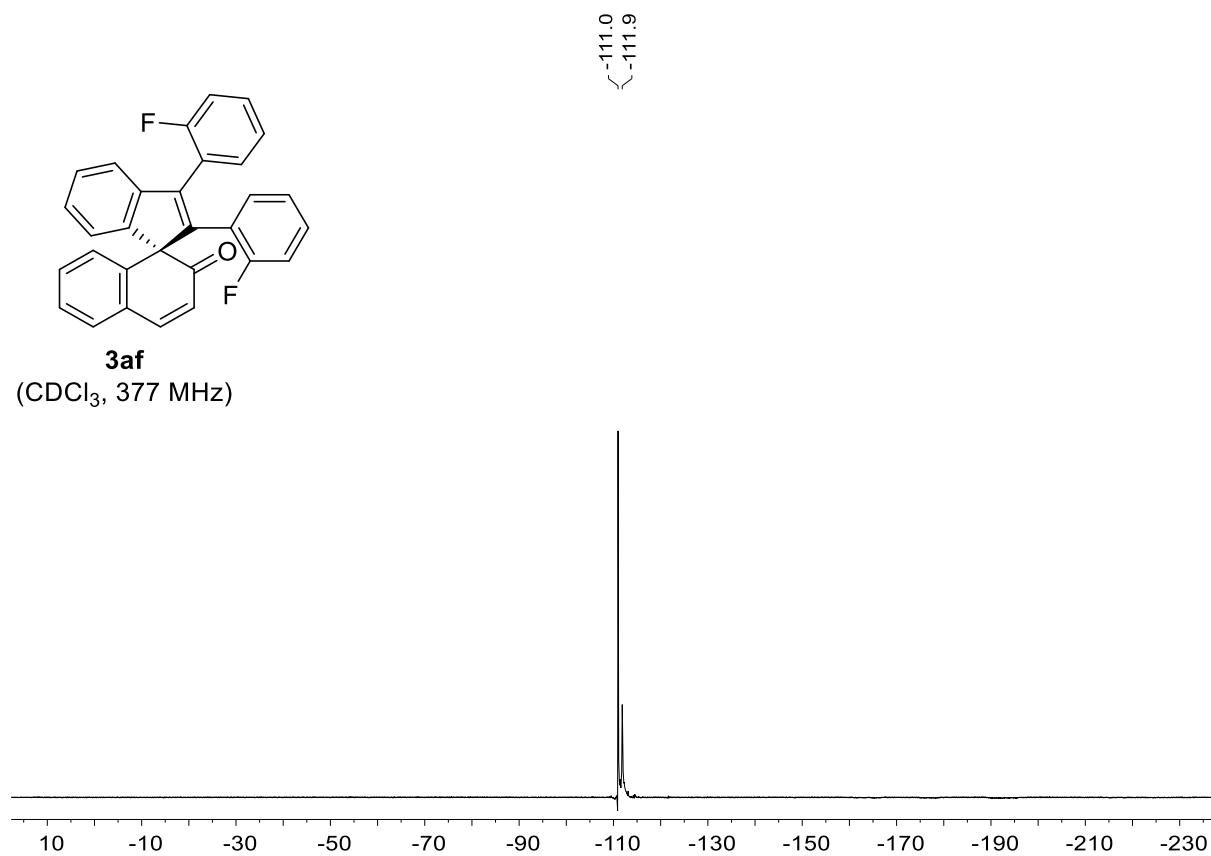

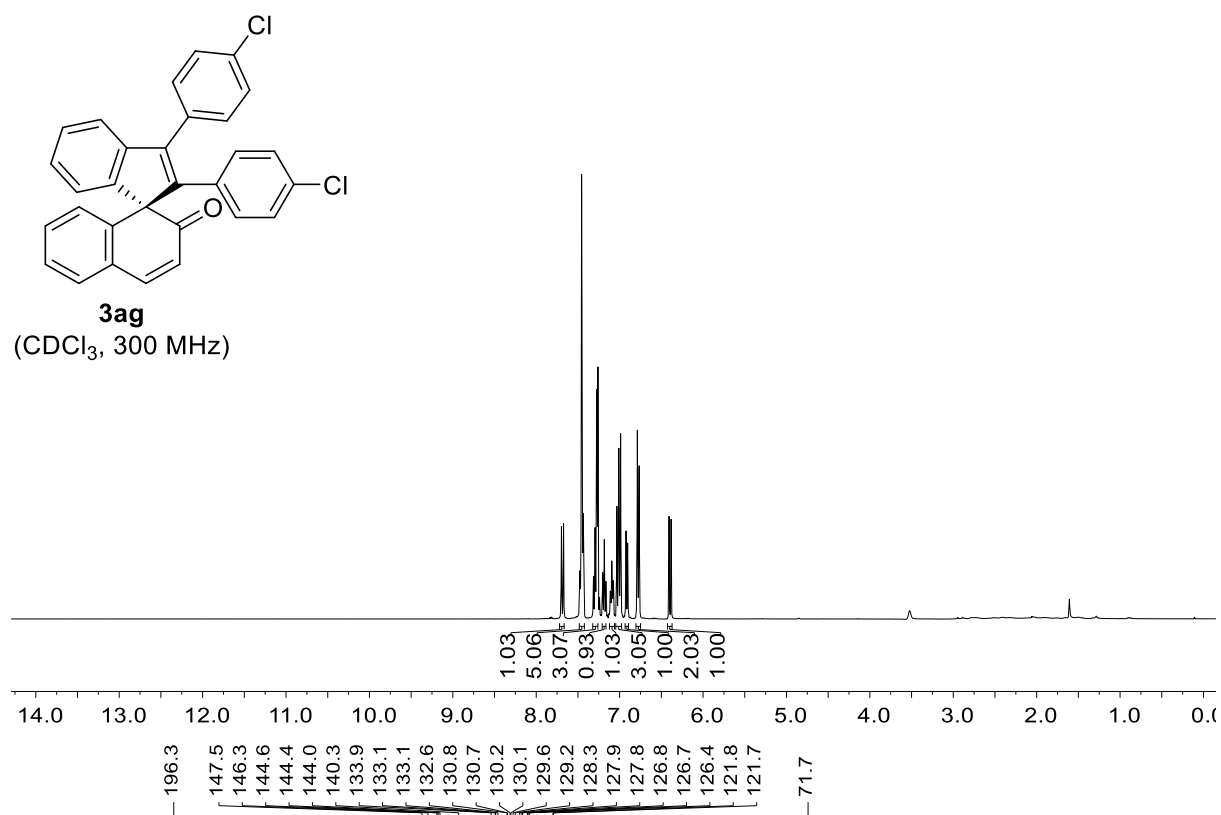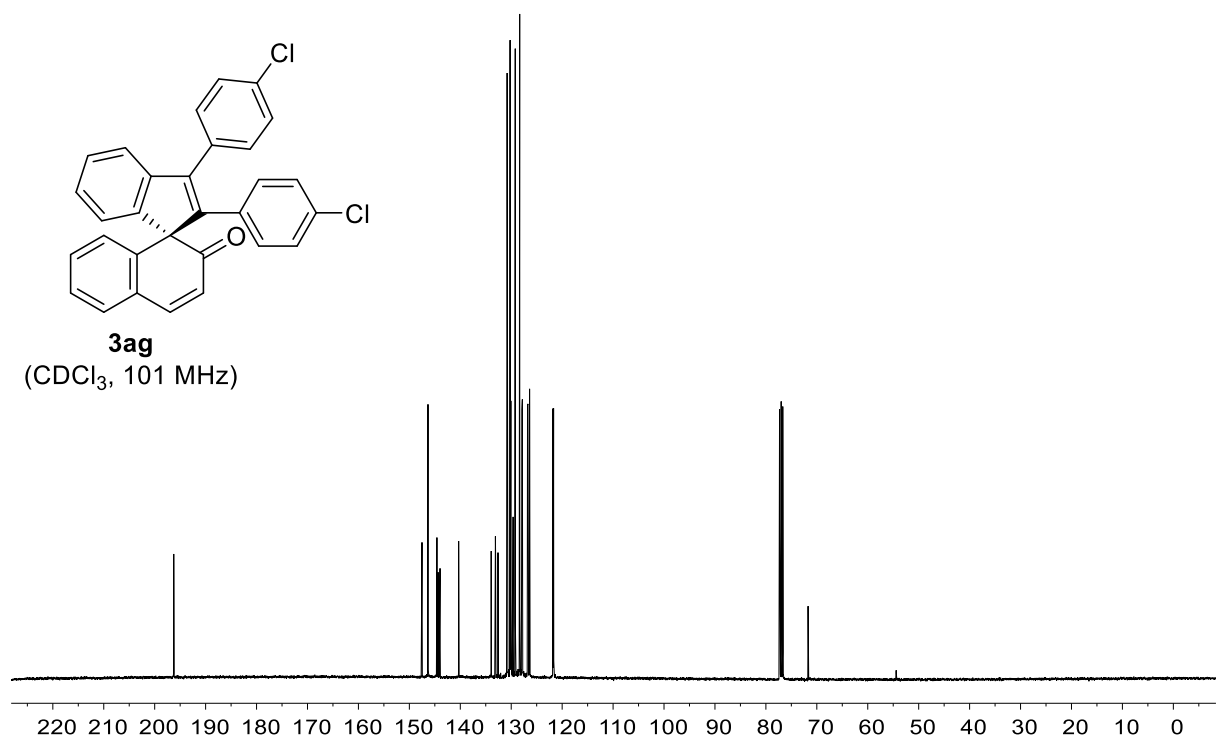



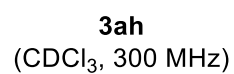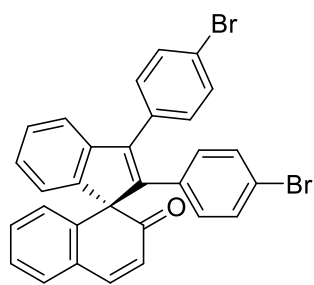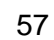

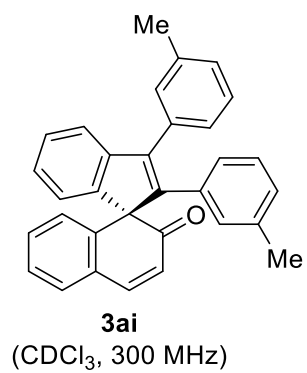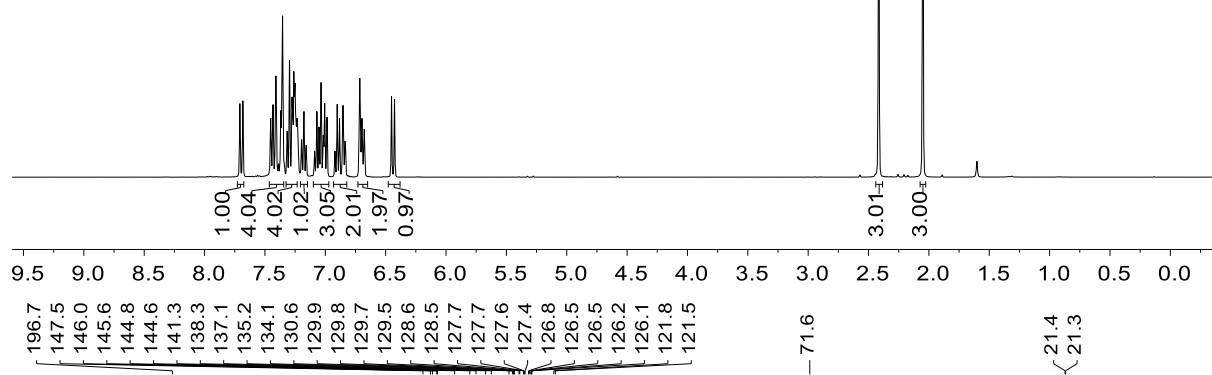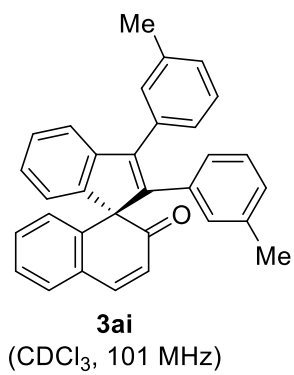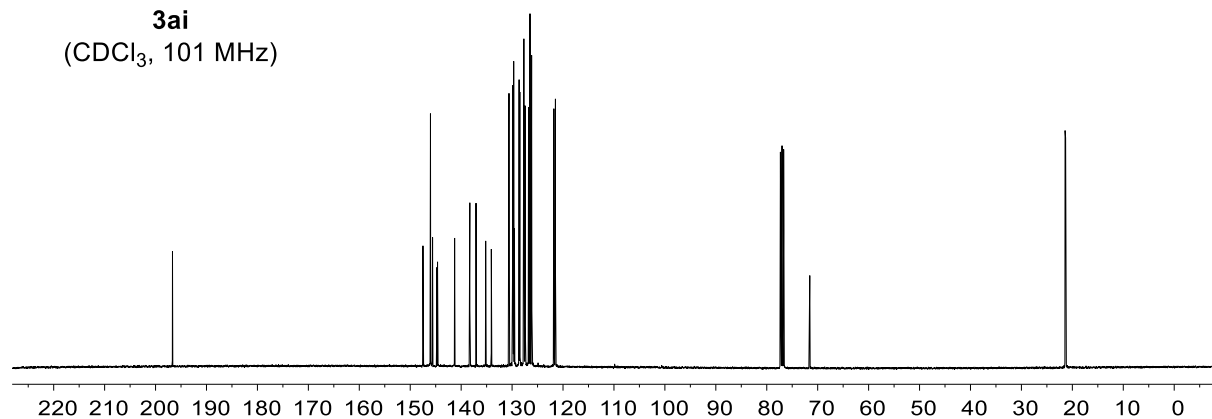

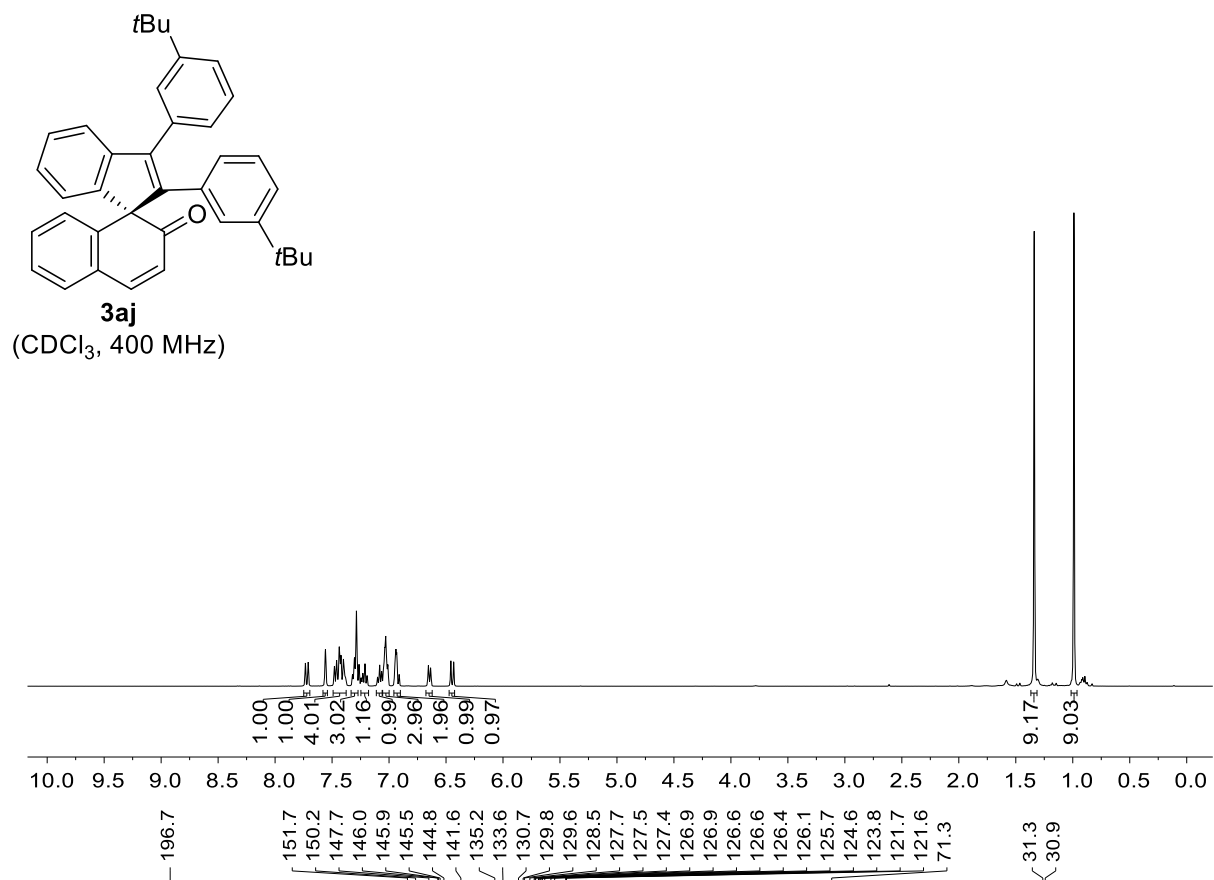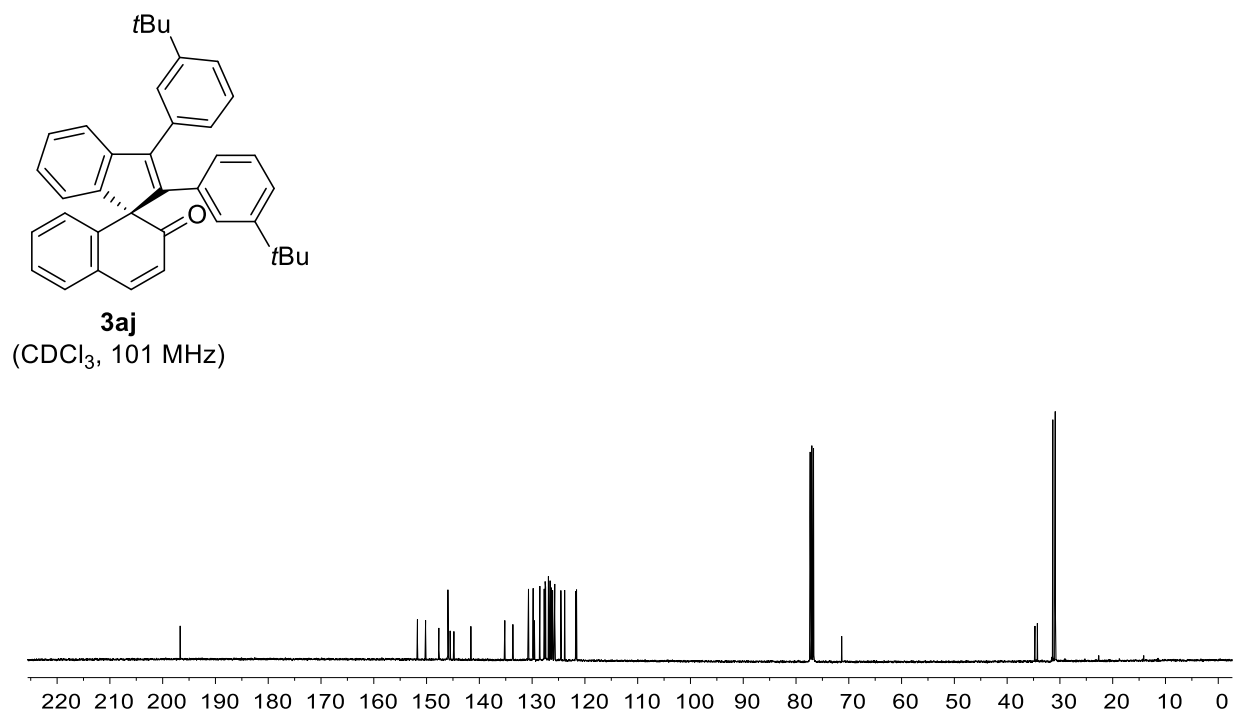

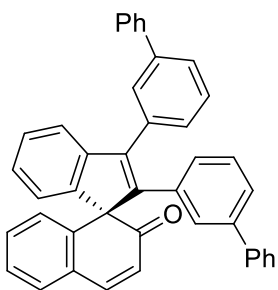

**3ak**  
(CDCl<sub>3</sub>, 300 MHz)

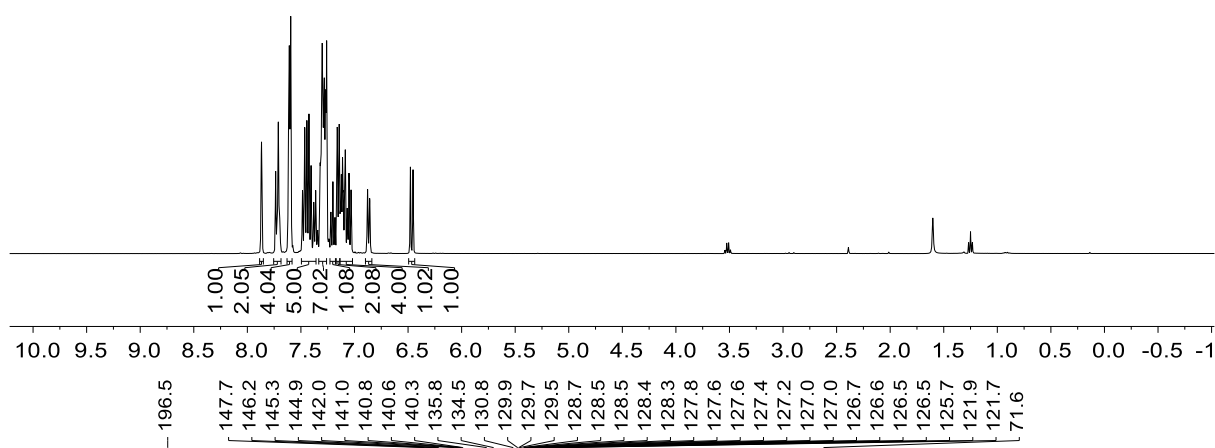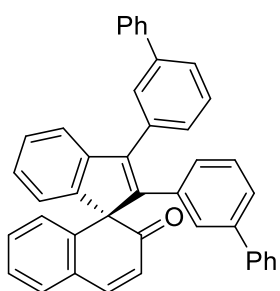

**3ak**  
(CDCl<sub>3</sub>, 101 MHz)

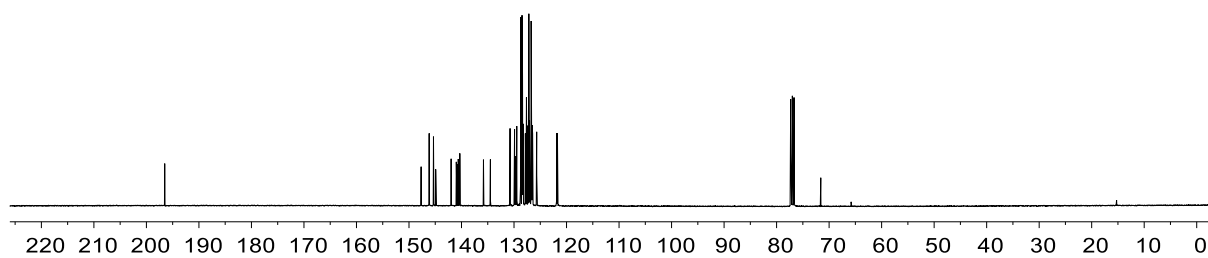

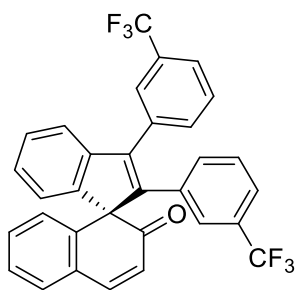

**3al**  
(CDCl<sub>3</sub>, 300 MHz)

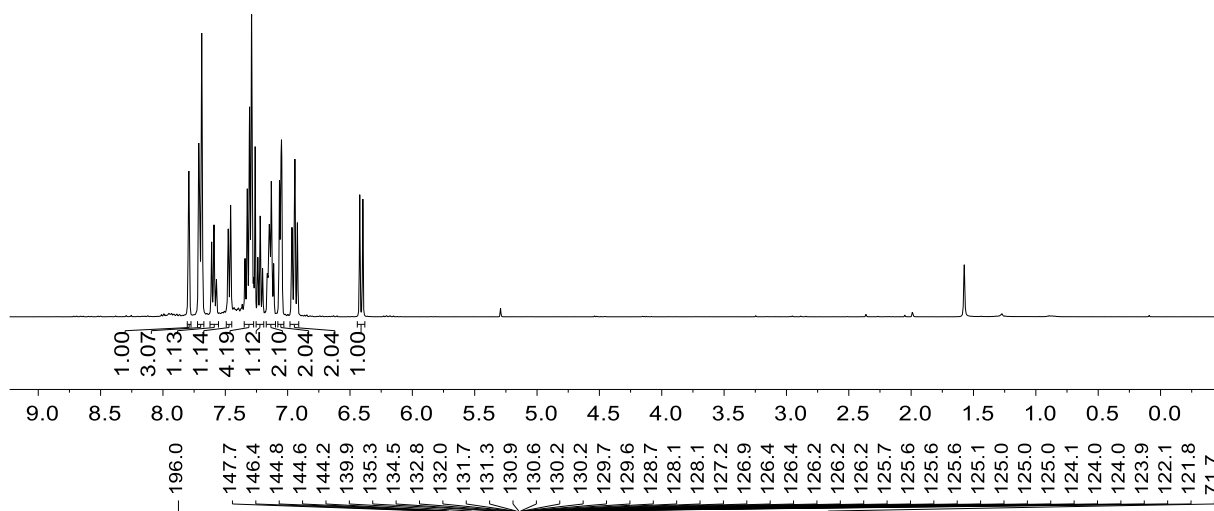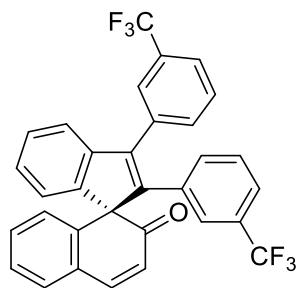

**3al**  
(CDCl<sub>3</sub>, 101 MHz)

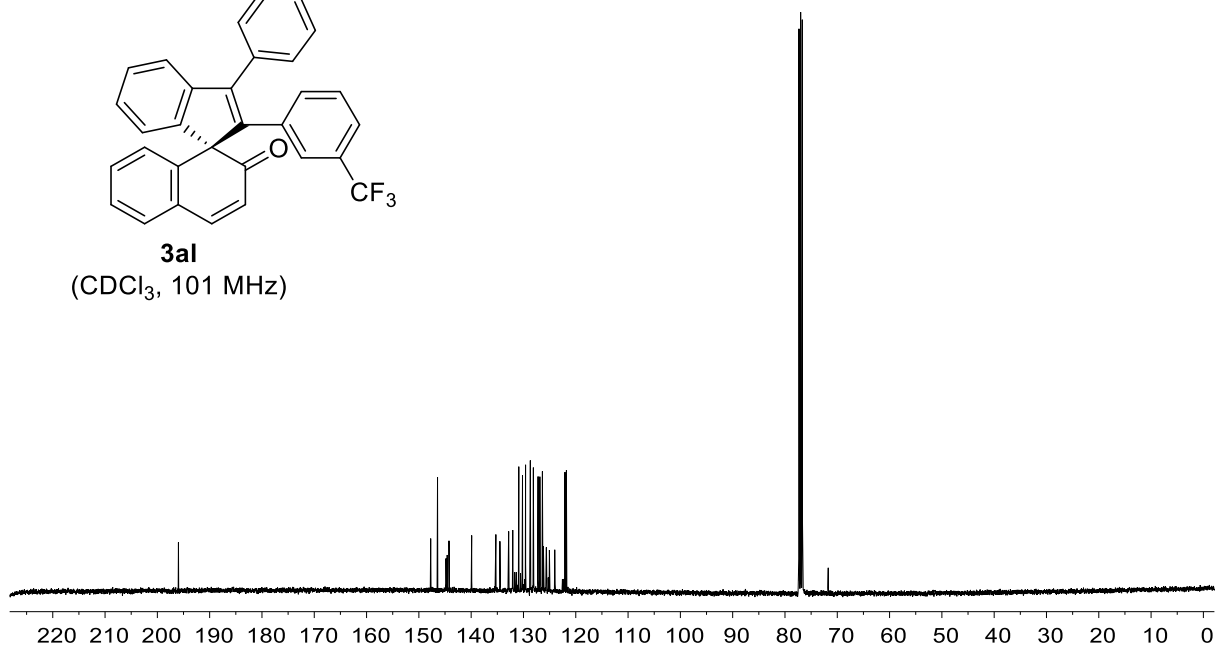

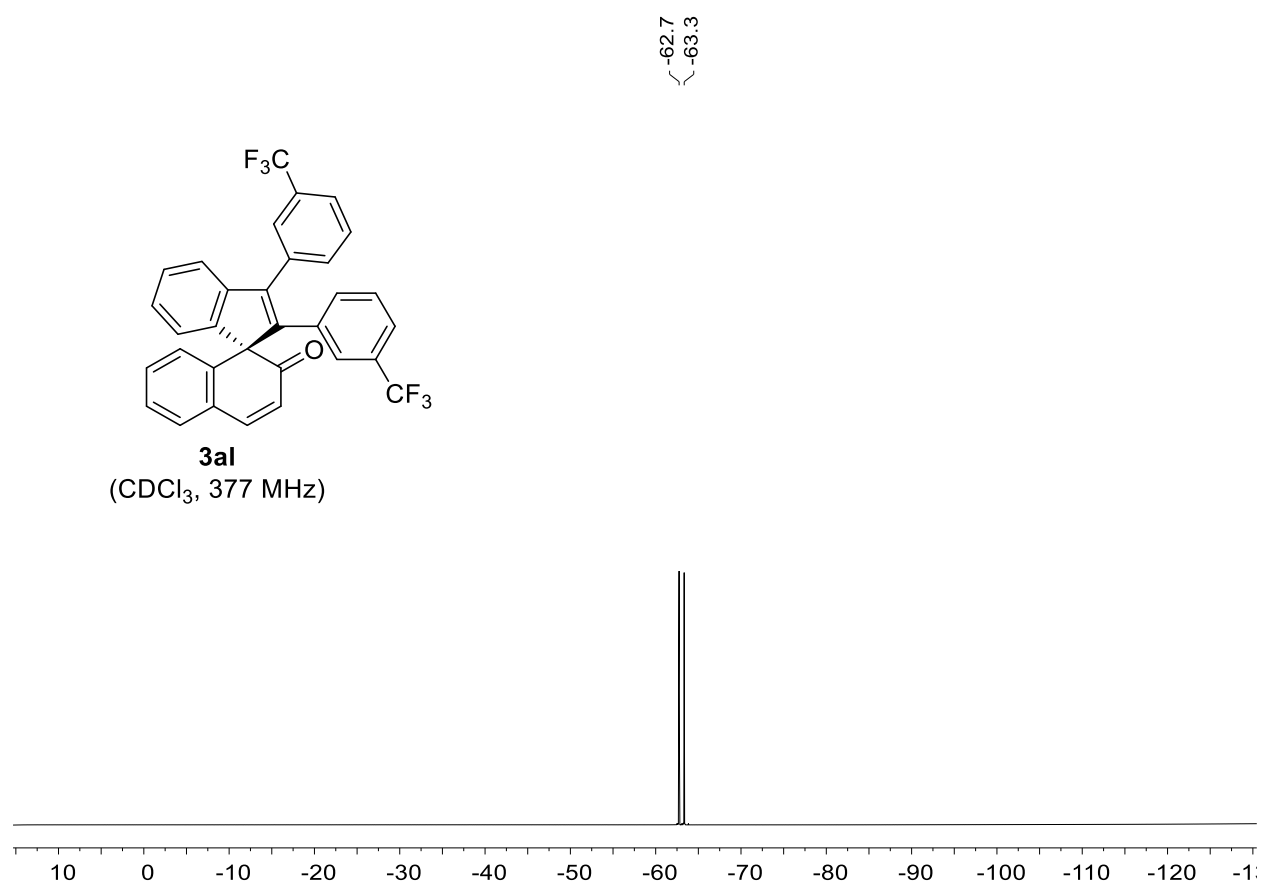

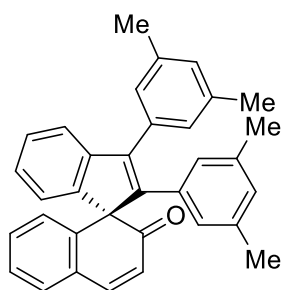

**3am**  
(CDCl<sub>3</sub>, 300 MHz)

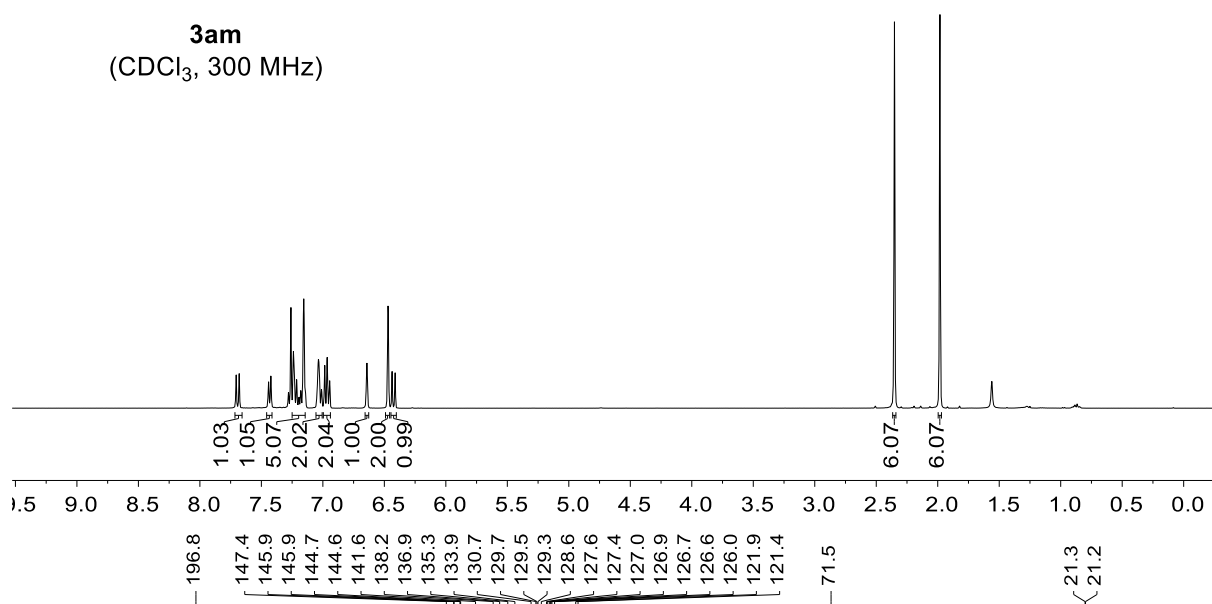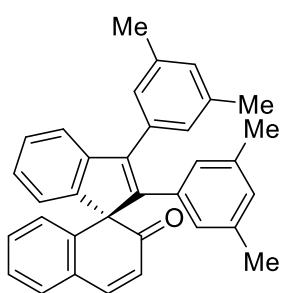

**3am**  
(CDCl<sub>3</sub>, 101 MHz)

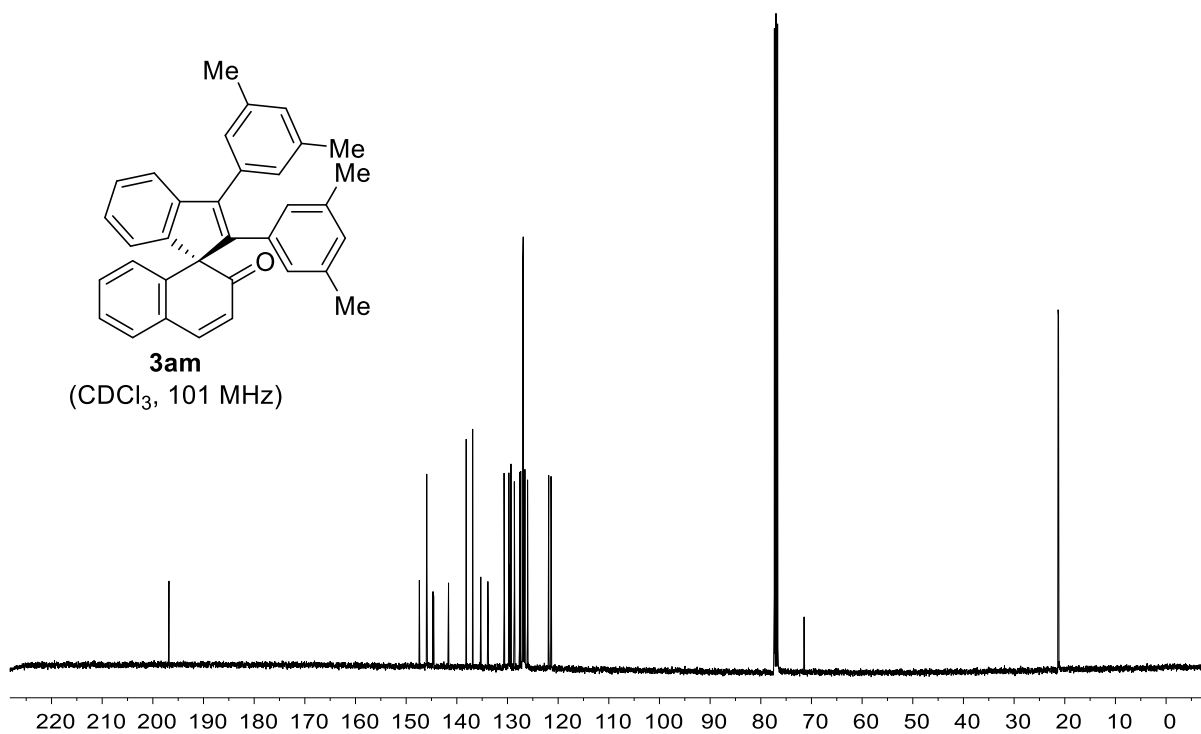

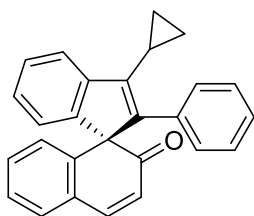

**3an**  
(CDCl<sub>3</sub>, 300 MHz)

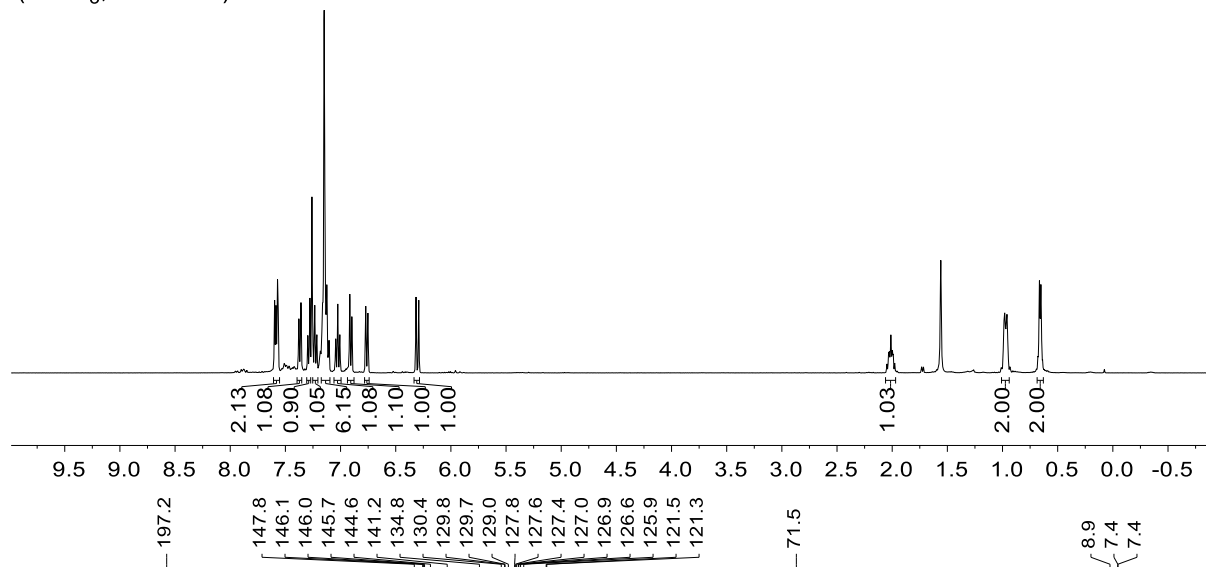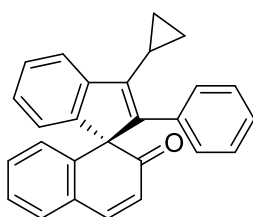

**3an**  
(CDCl<sub>3</sub>, 101 MHz)

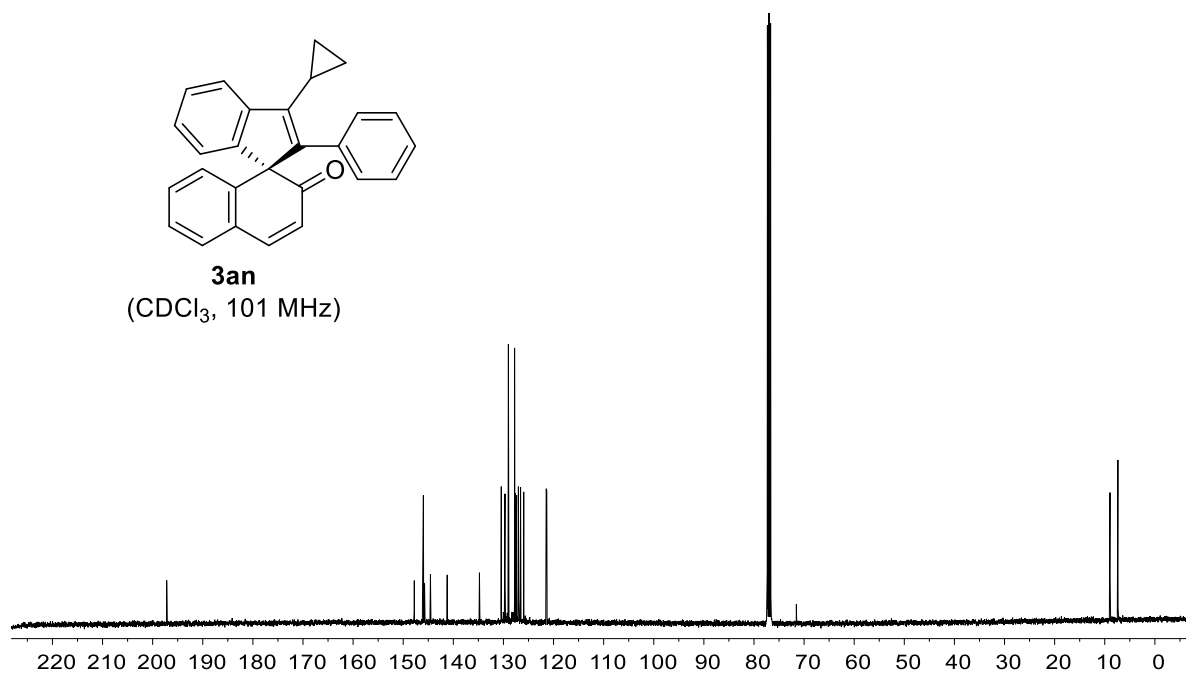



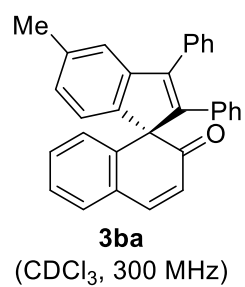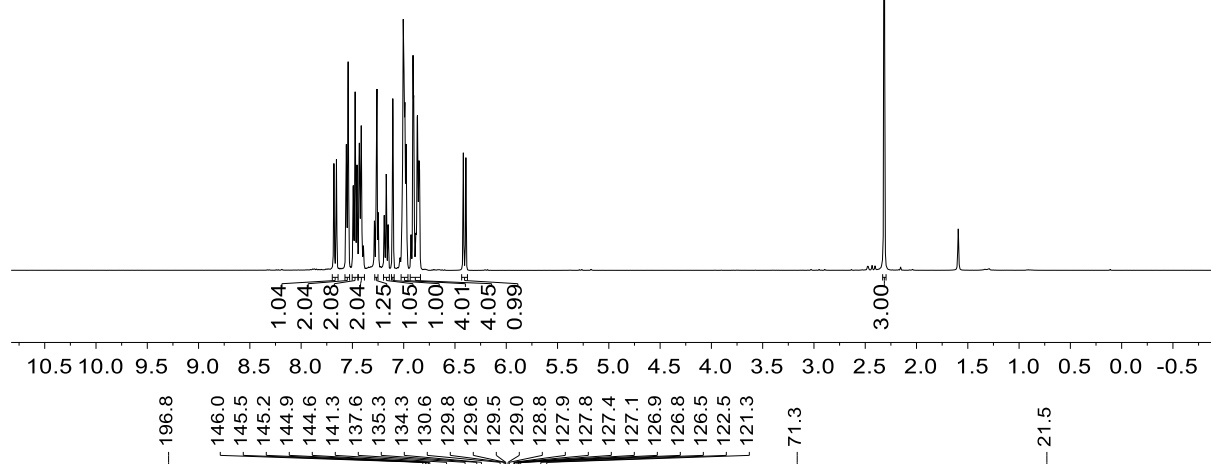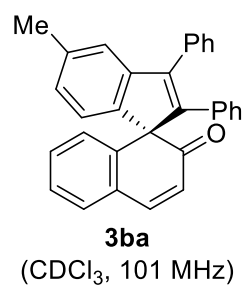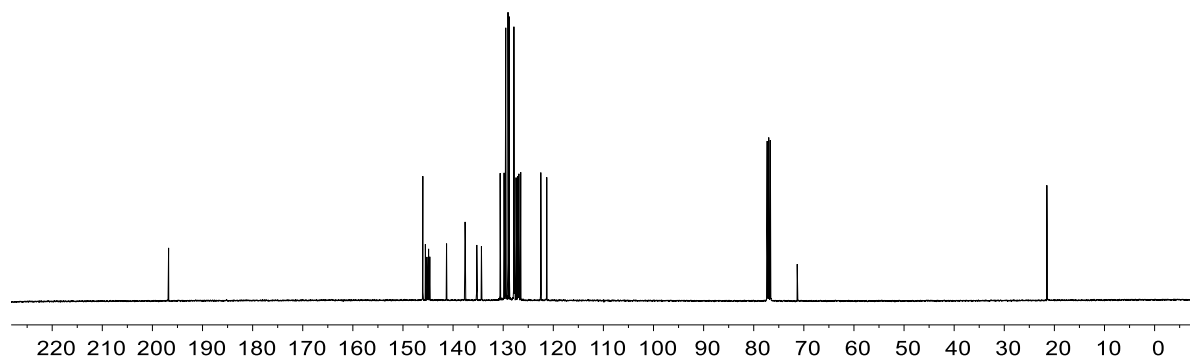

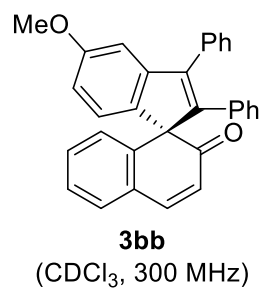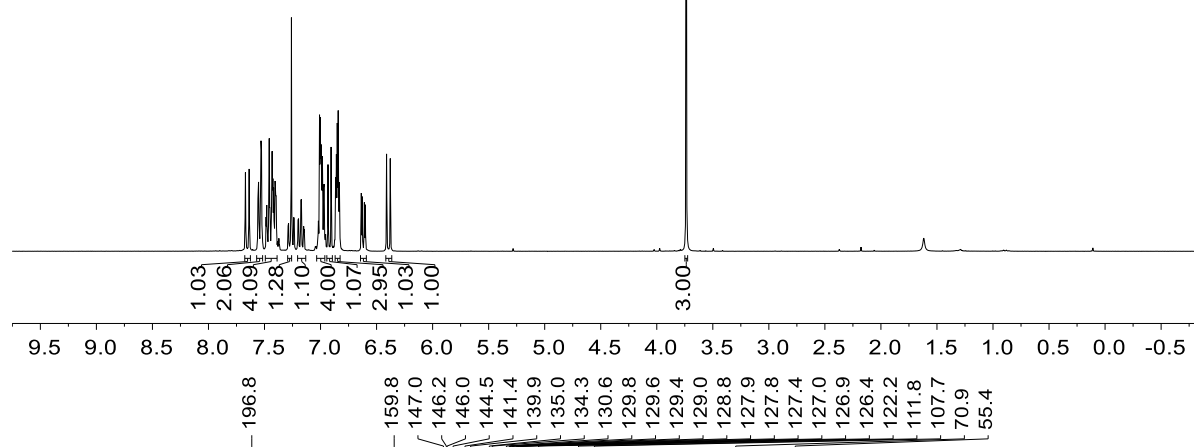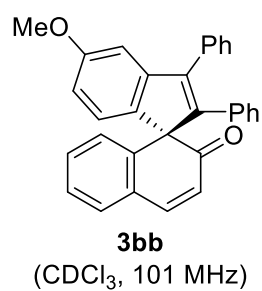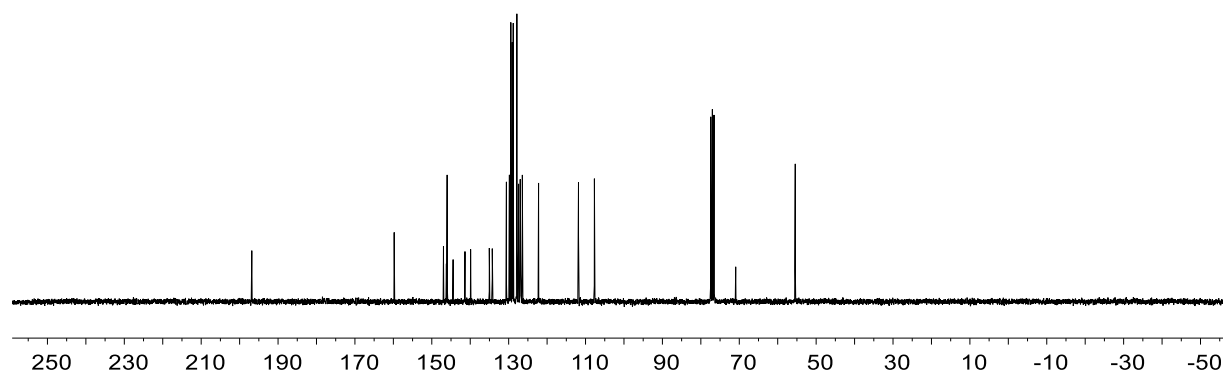

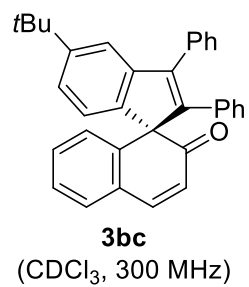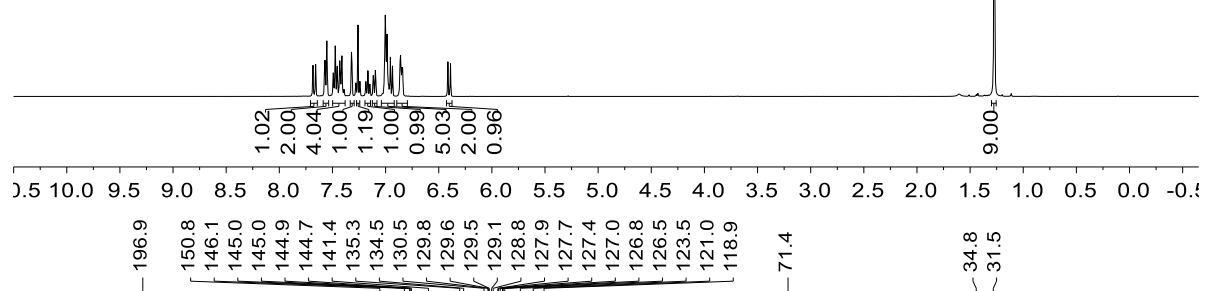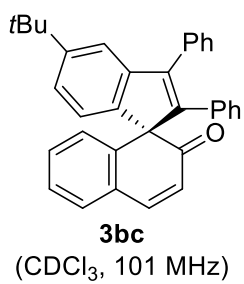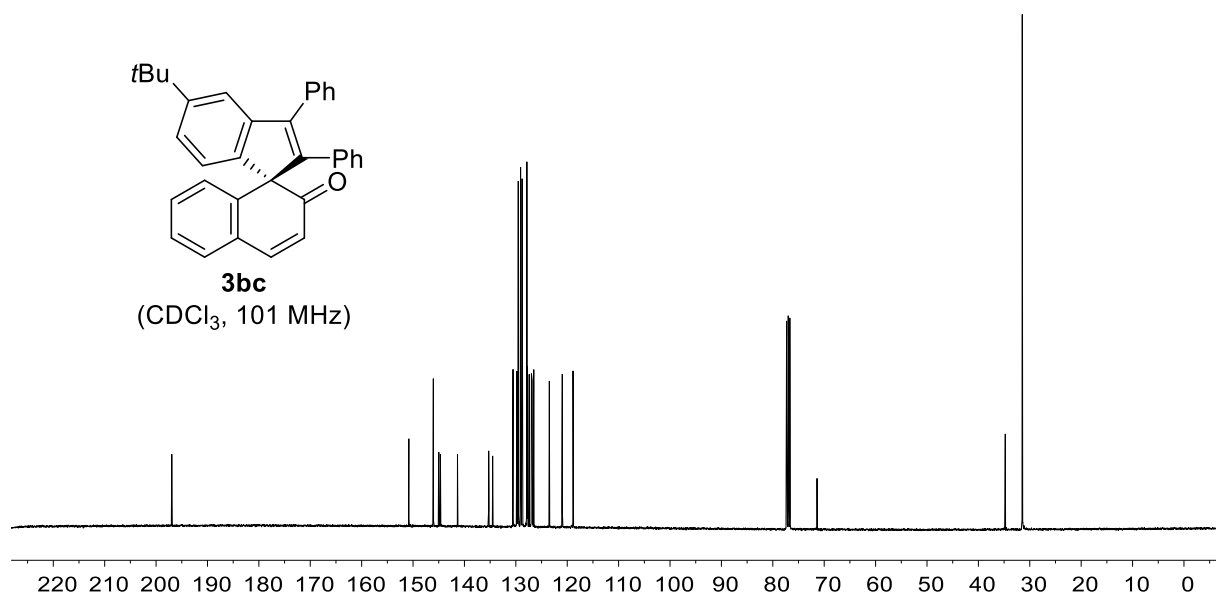

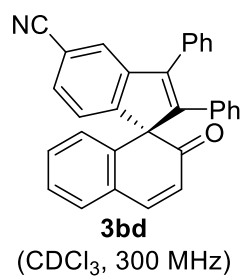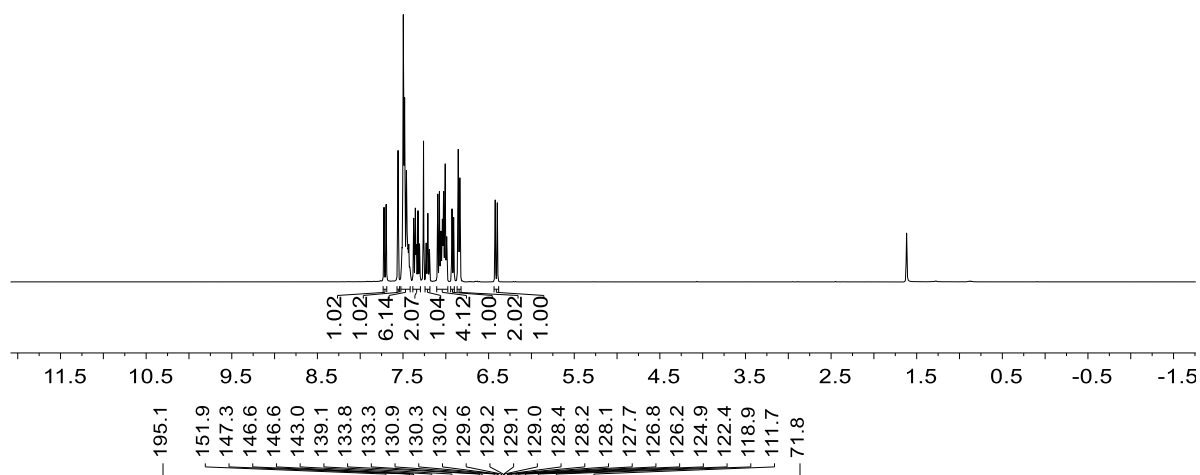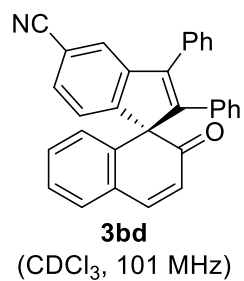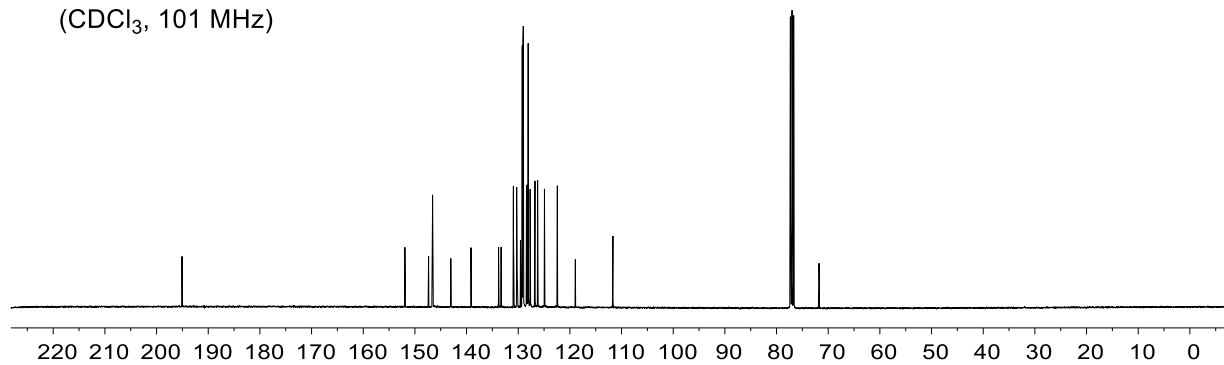

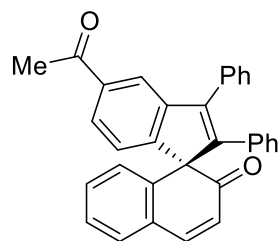

**3be**  
(CDCl<sub>3</sub>, 300 MHz)

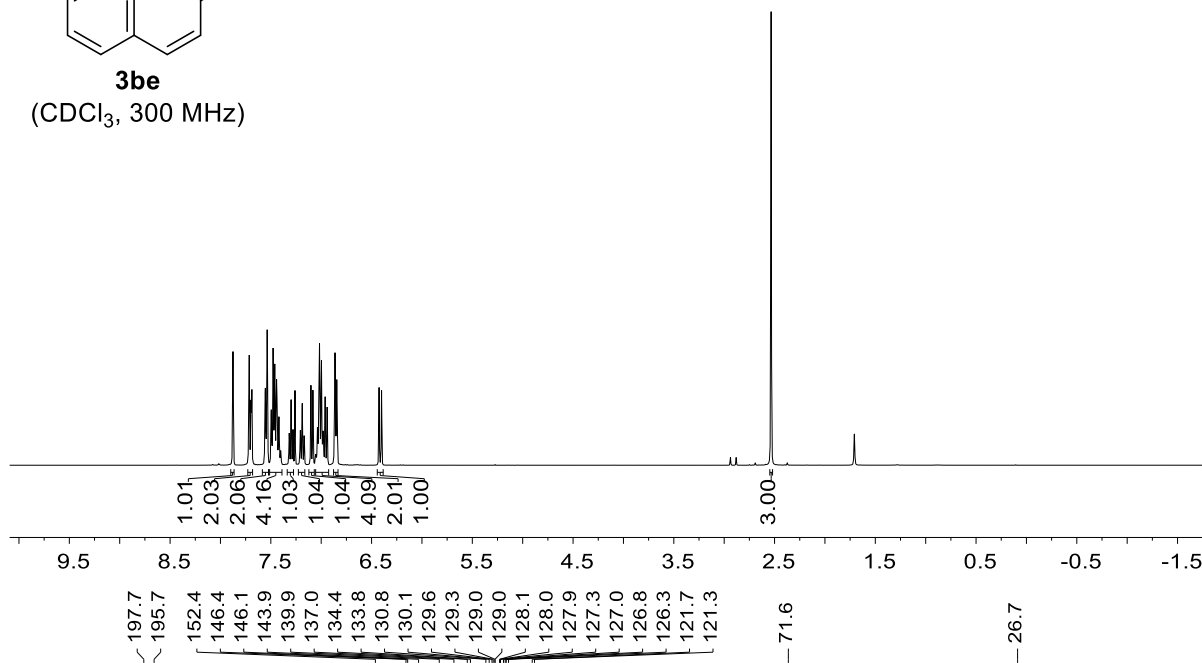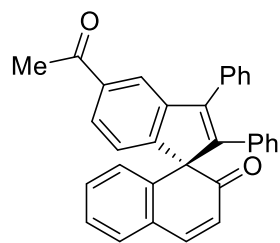

**3be**  
(CDCl<sub>3</sub>, 101 MHz)

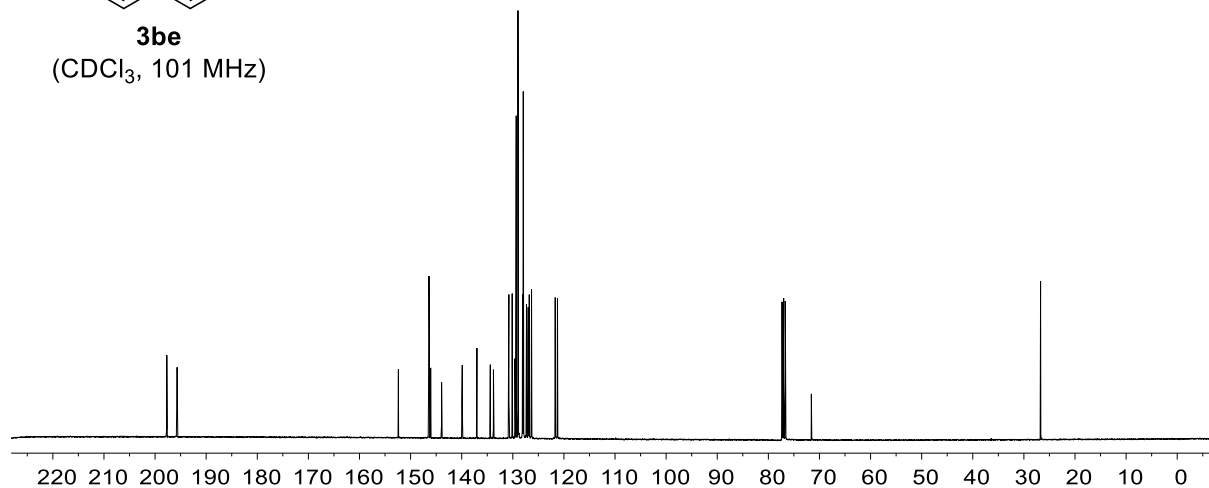

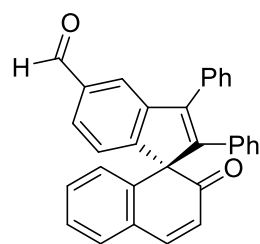

**3bf**  
(CDCl<sub>3</sub>, 300 MHz)

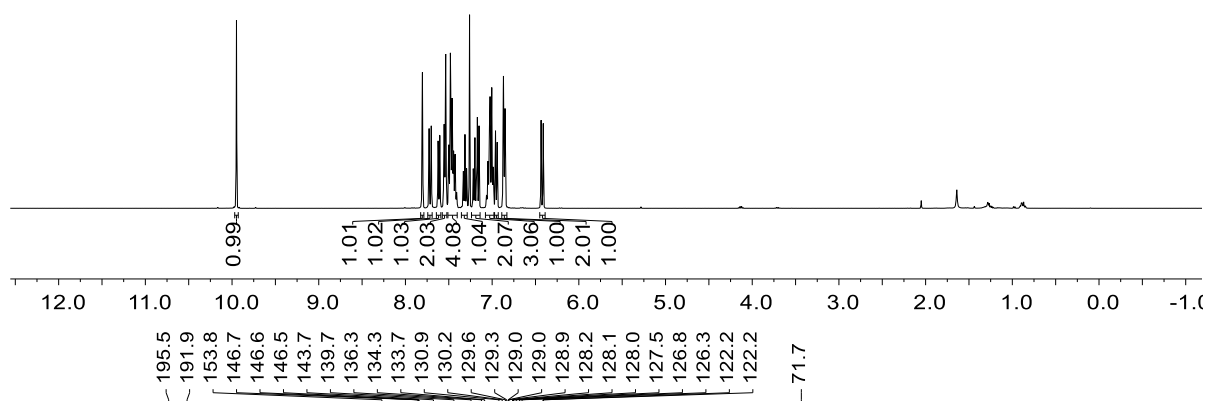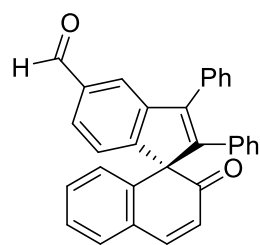

**3bf**  
(CDCl<sub>3</sub>, 101 MHz)

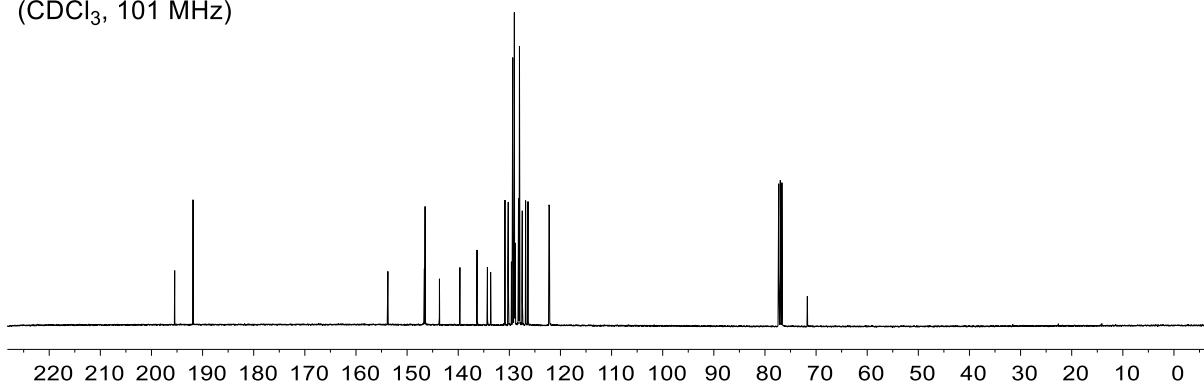

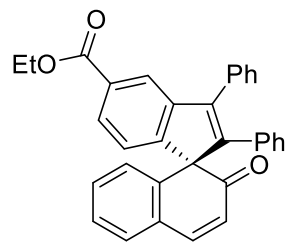

**3bg**  
(CDCl<sub>3</sub>, 300 MHz)

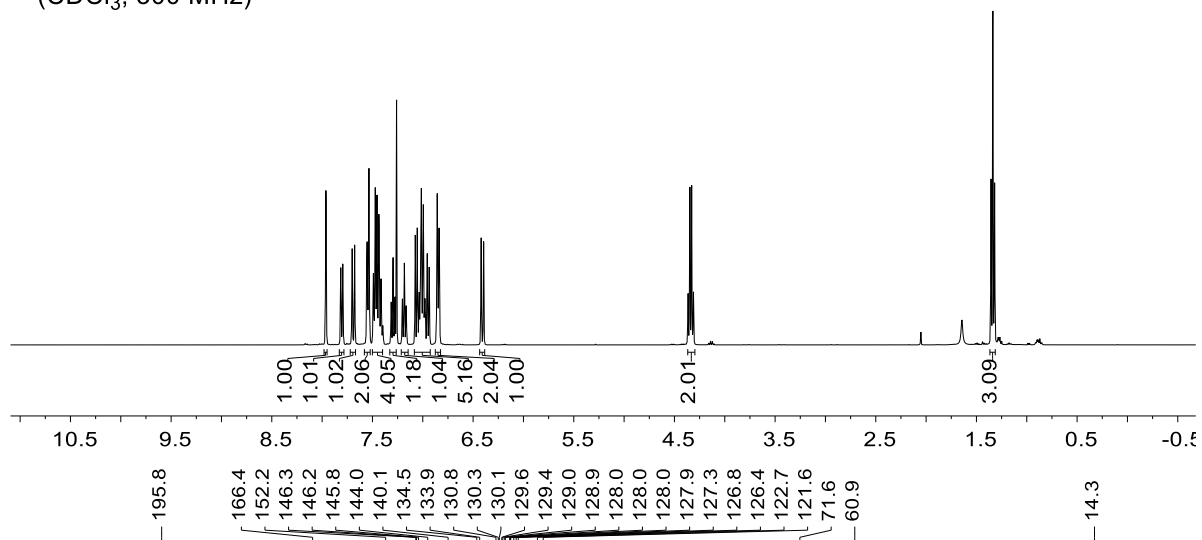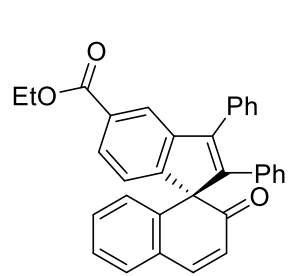

**3bg**  
(CDCl<sub>3</sub>, 101 MHz)

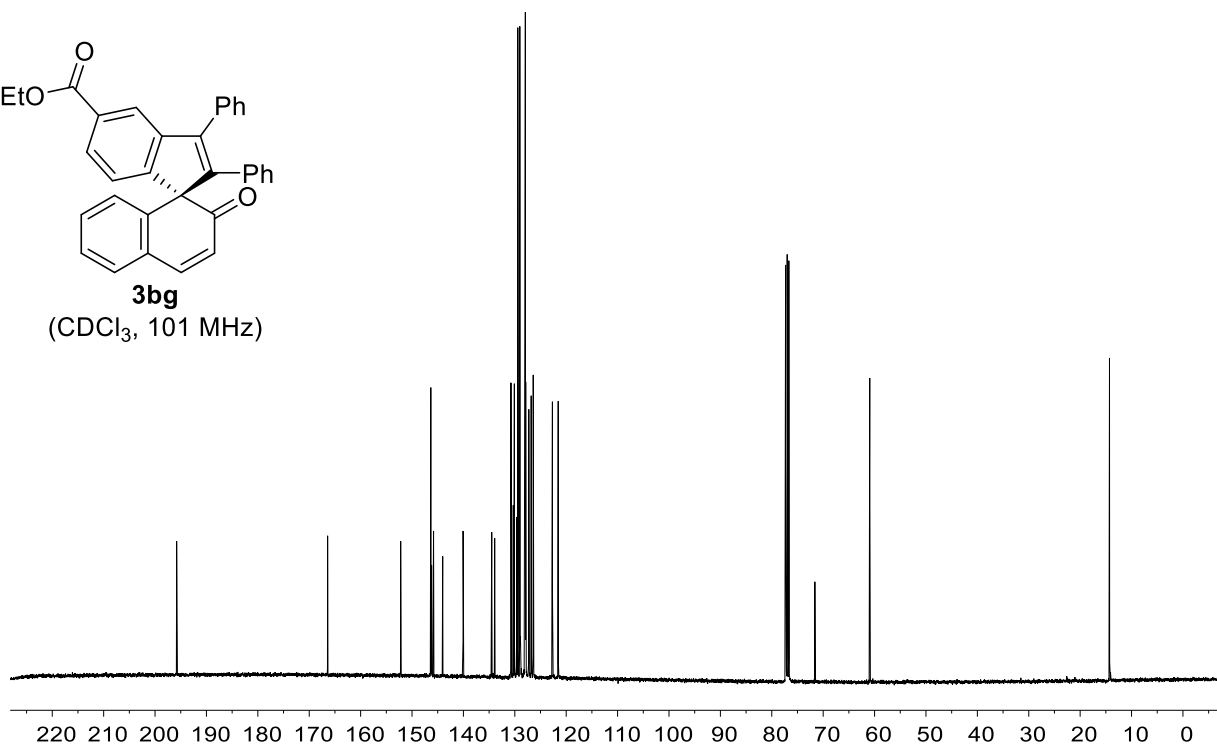

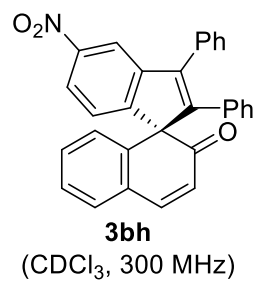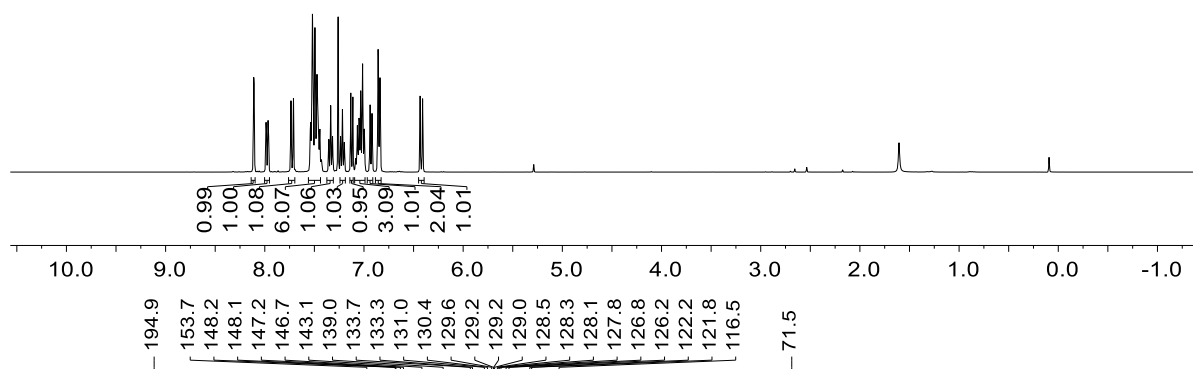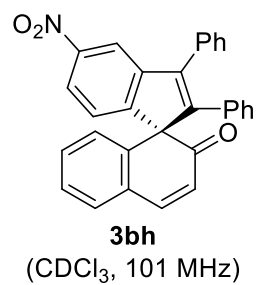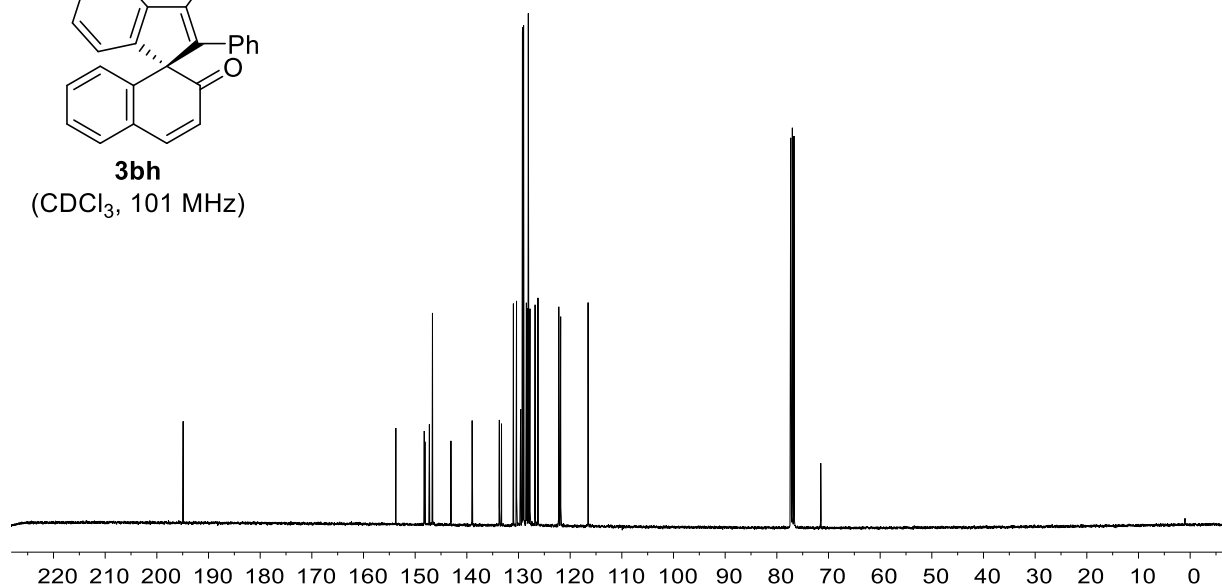



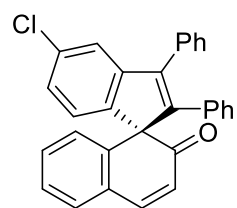

**3bi**  
(CDCl<sub>3</sub>, 300 MHz)

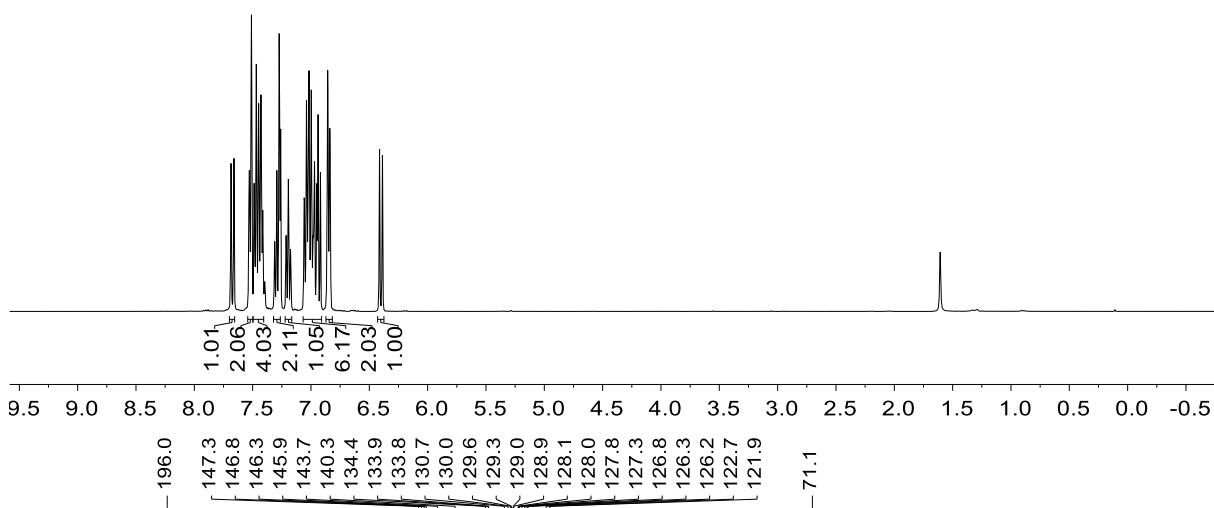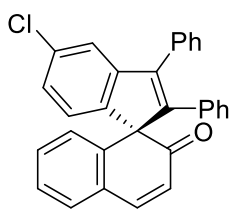

**3bi**  
(CDCl<sub>3</sub>, 101 MHz)

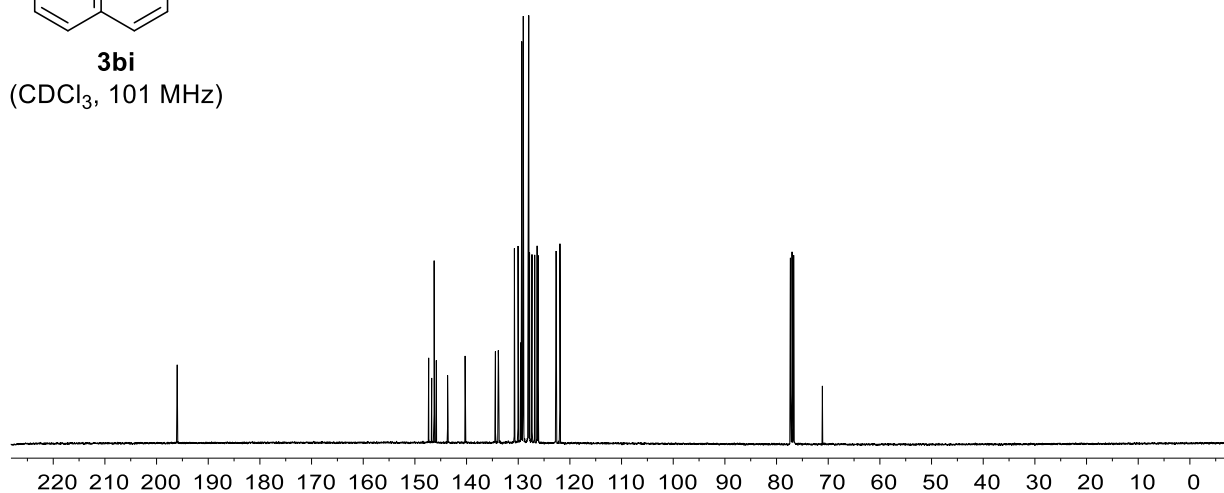

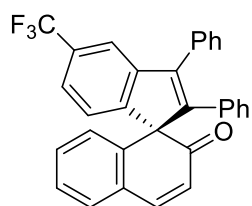

**3bj**  
(CDCl<sub>3</sub>, 300 MHz)

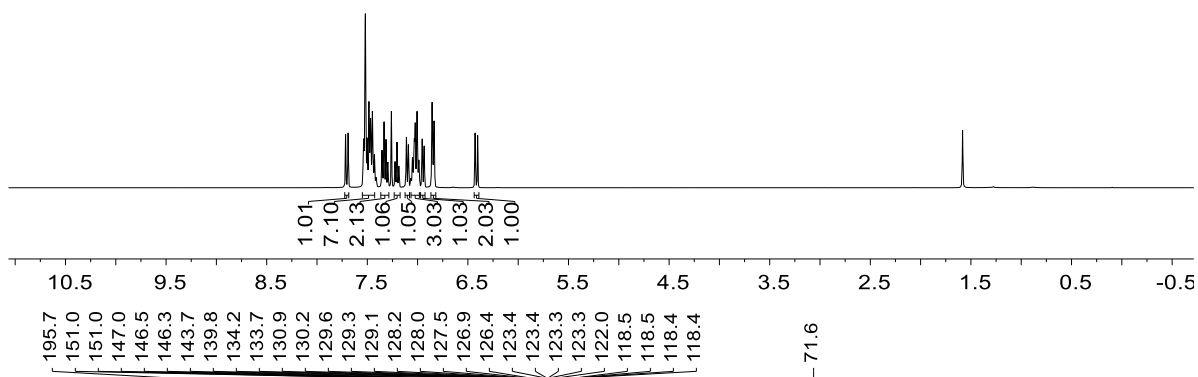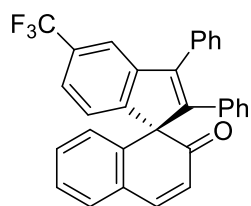

**3bj**  
(CDCl<sub>3</sub>, 101 MHz)

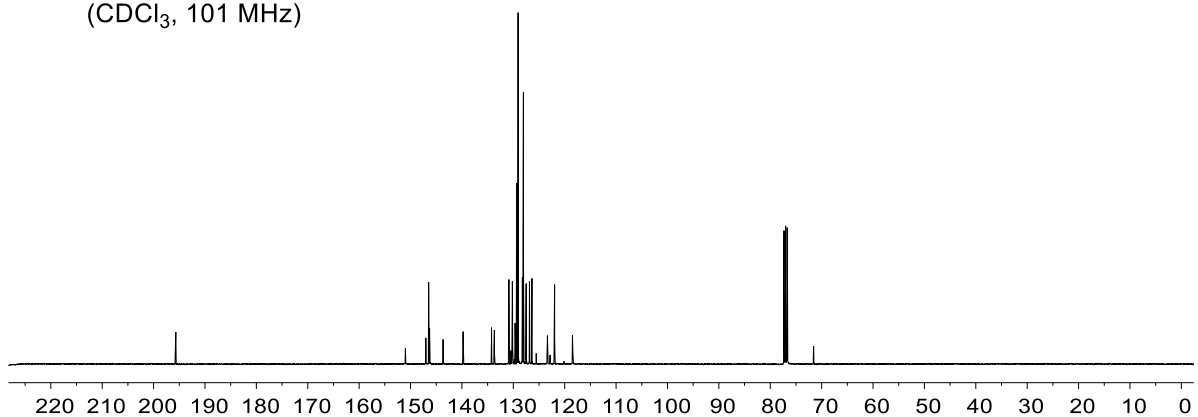

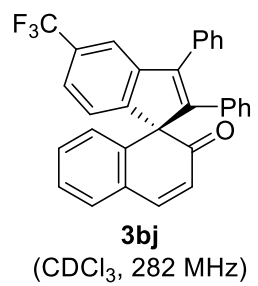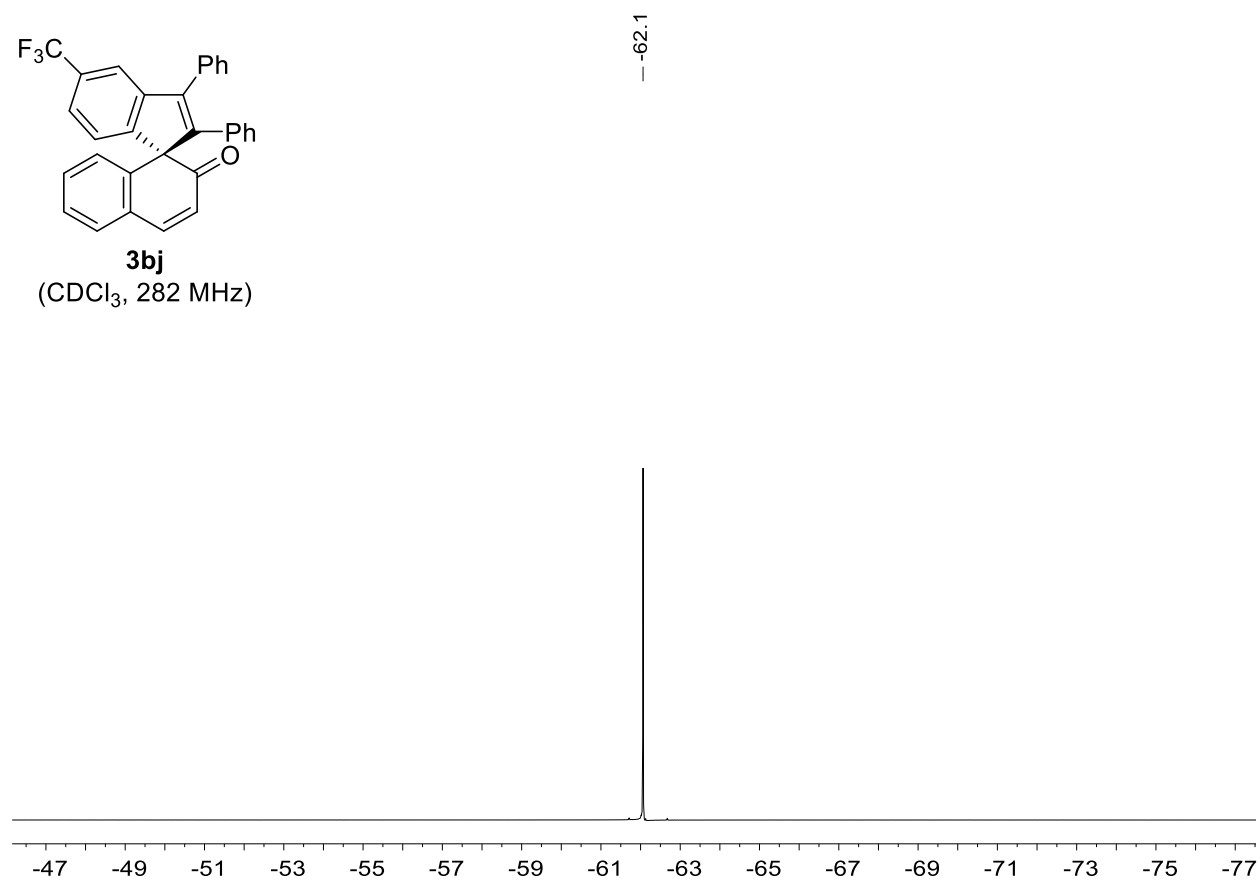

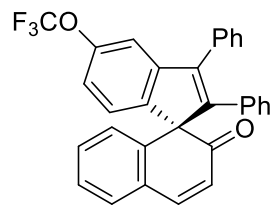

**3bk**  
(CDCl<sub>3</sub>, 300 MHz)

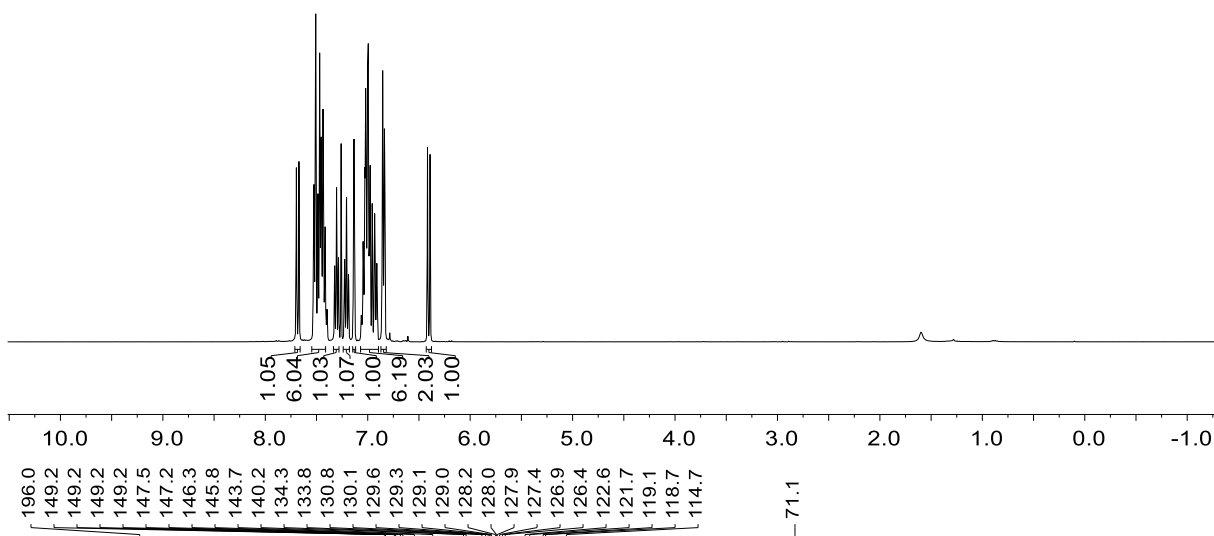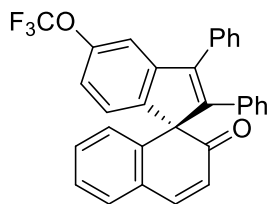

**3bk**  
(CDCl<sub>3</sub>, 101 MHz)

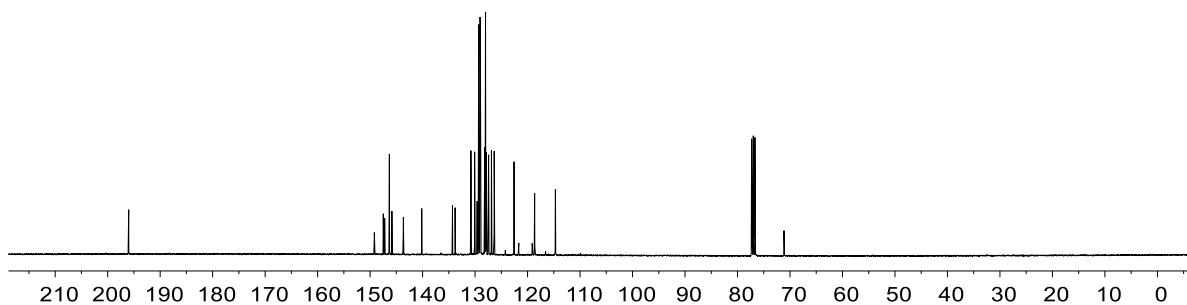

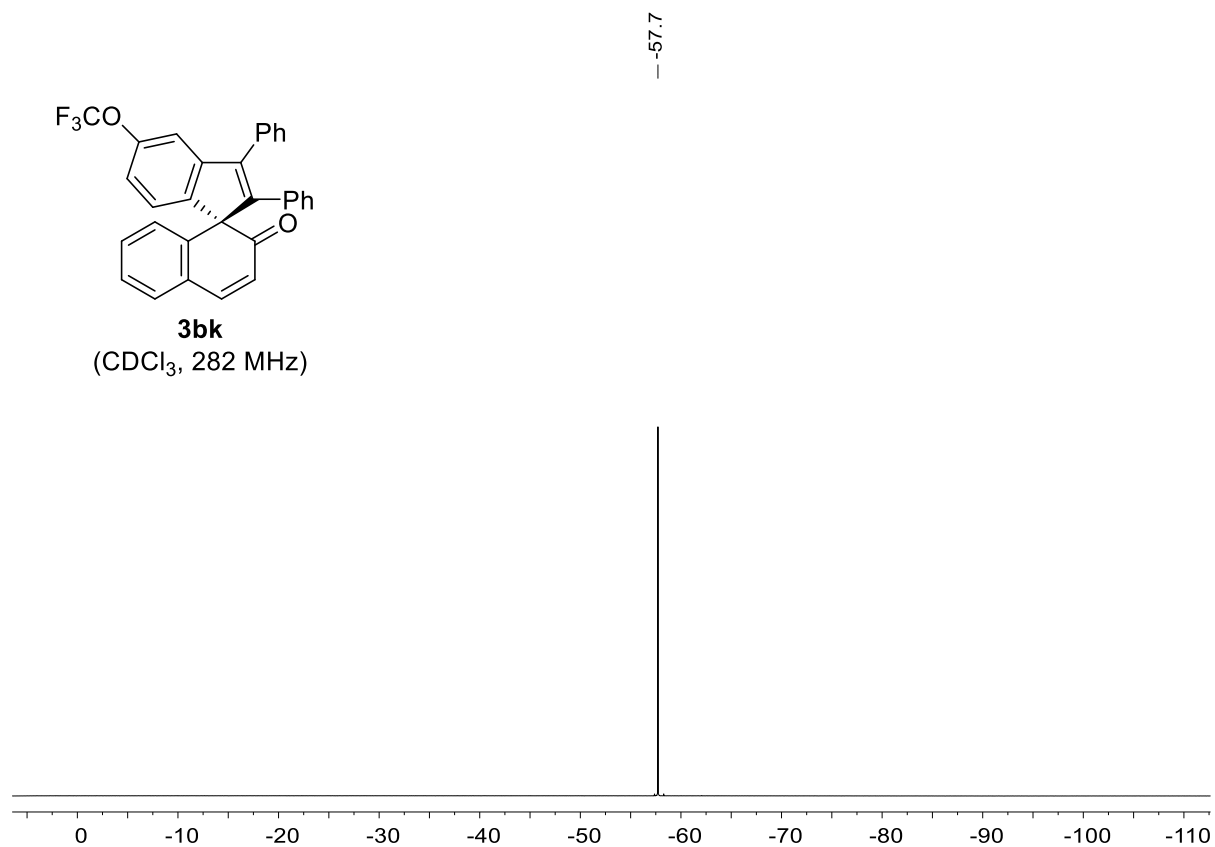

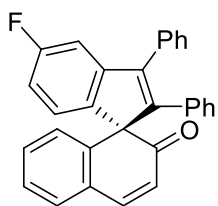

**3bl**  
(CDCl<sub>3</sub>, 300 MHz)

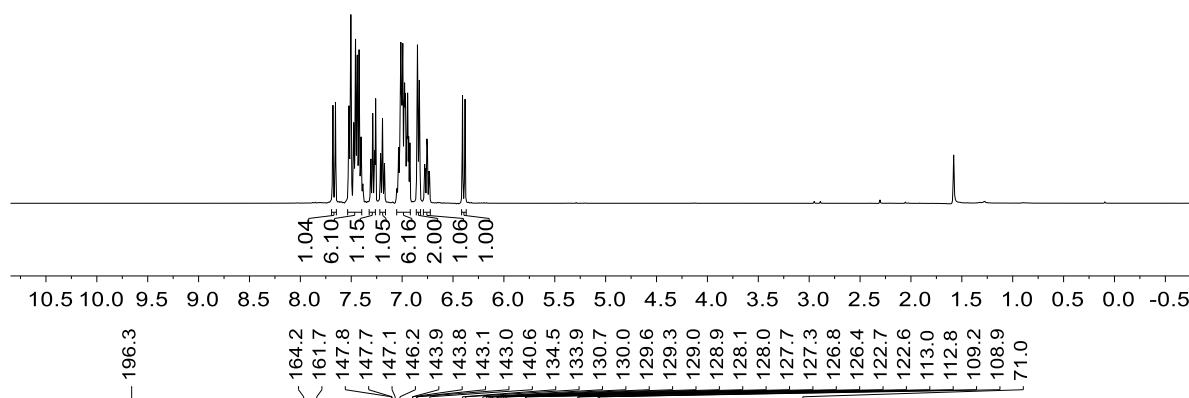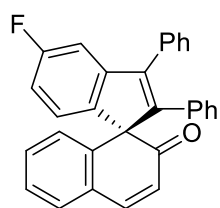

**3bl**  
(CDCl<sub>3</sub>, 101 MHz)

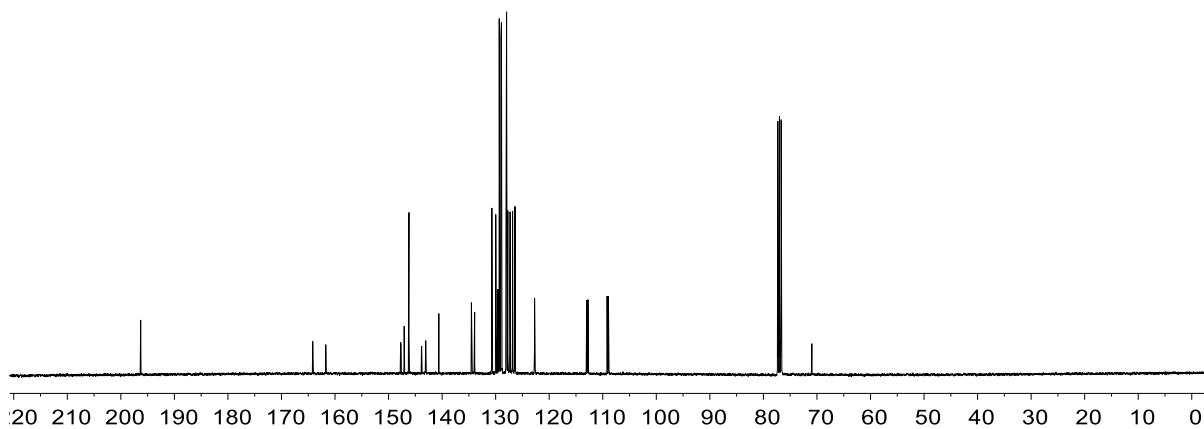

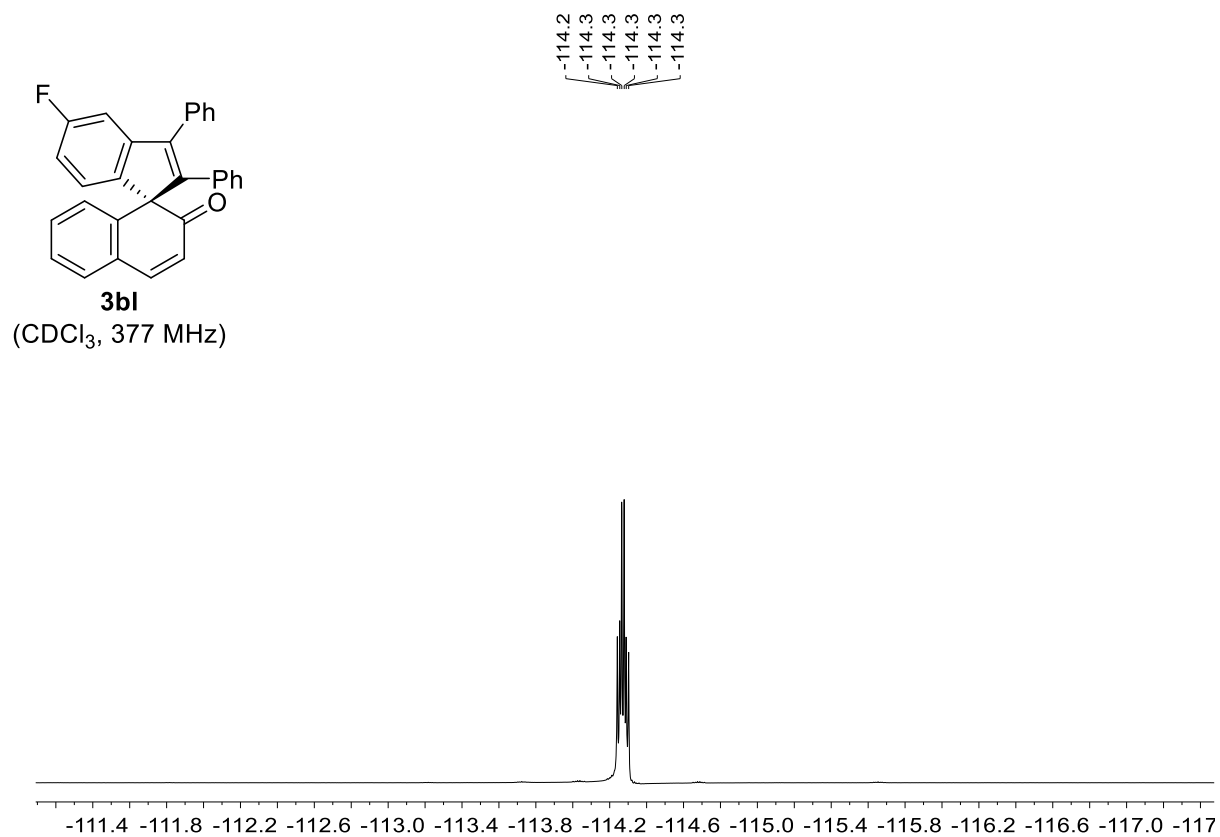

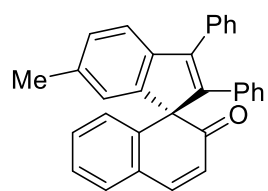

**3bm**  
(CDCl<sub>3</sub>, 300 MHz)

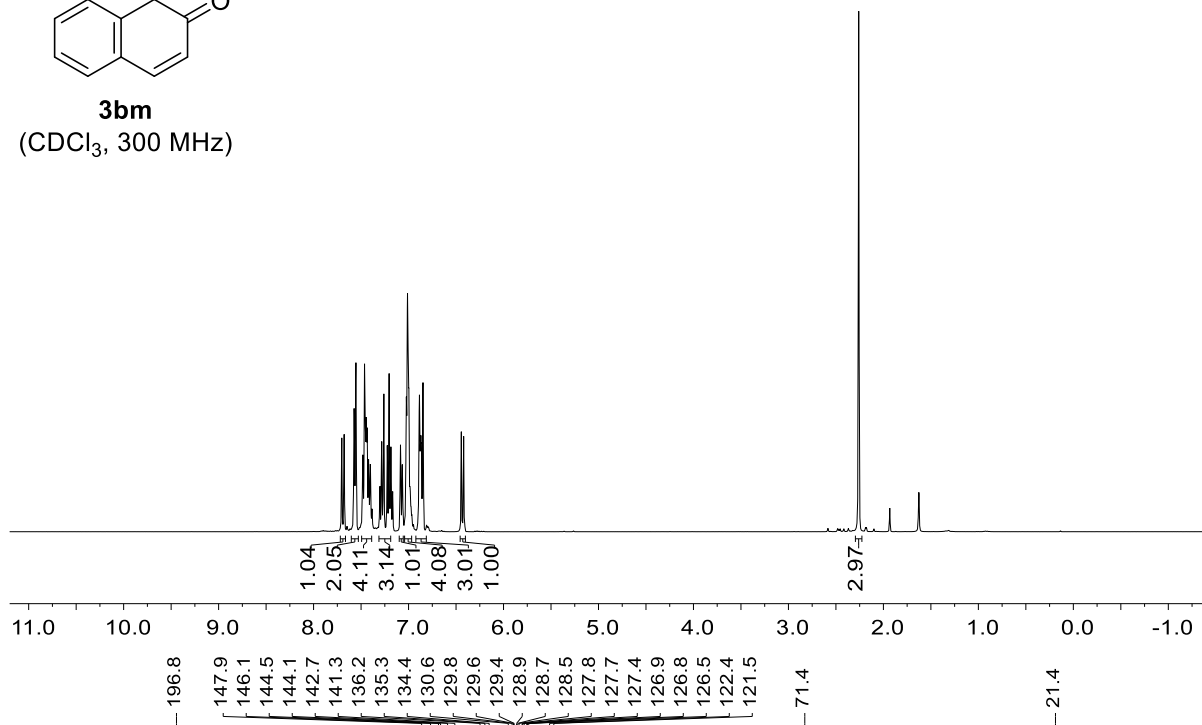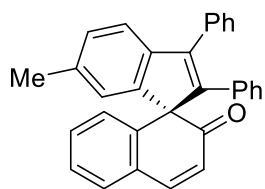

**3bm**  
(CDCl<sub>3</sub>, 101 MHz)

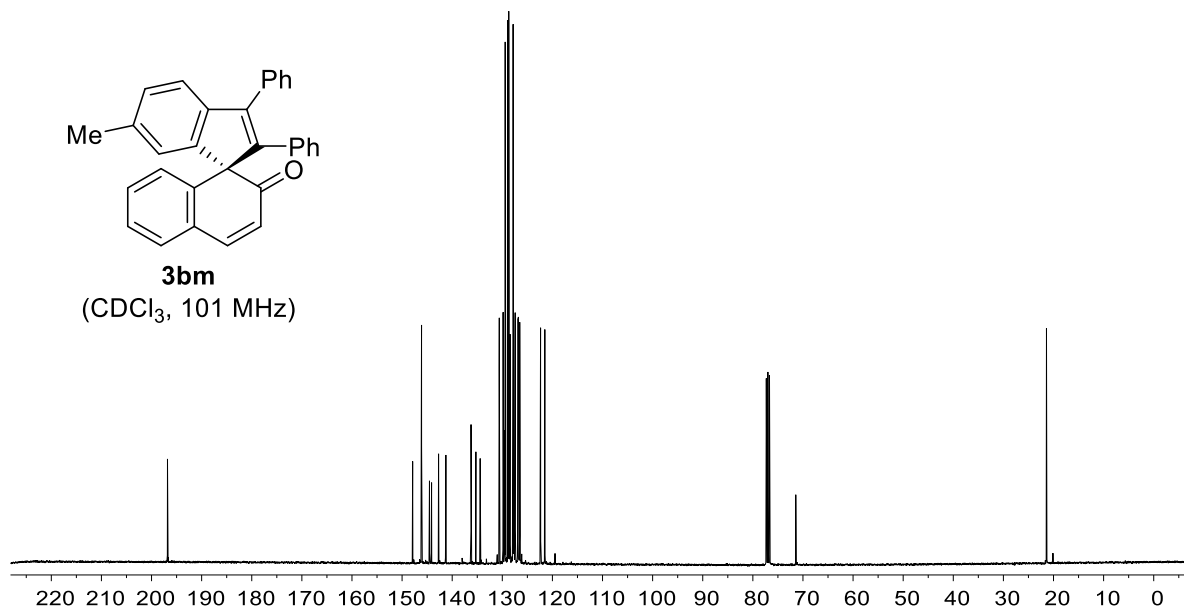



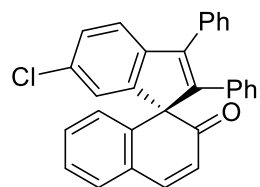

**3bn**  
(CDCl<sub>3</sub>, 300 MHz)

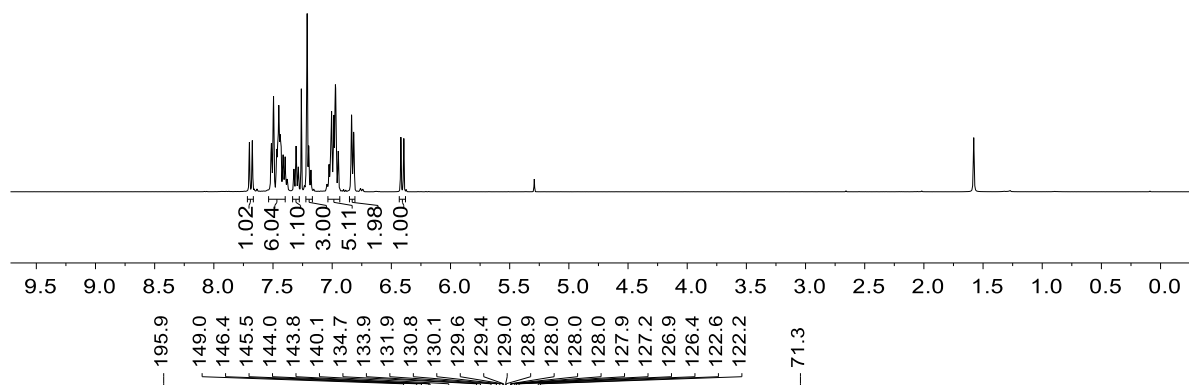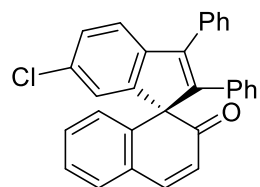

**3bn**  
(CDCl<sub>3</sub>, 101 MHz)

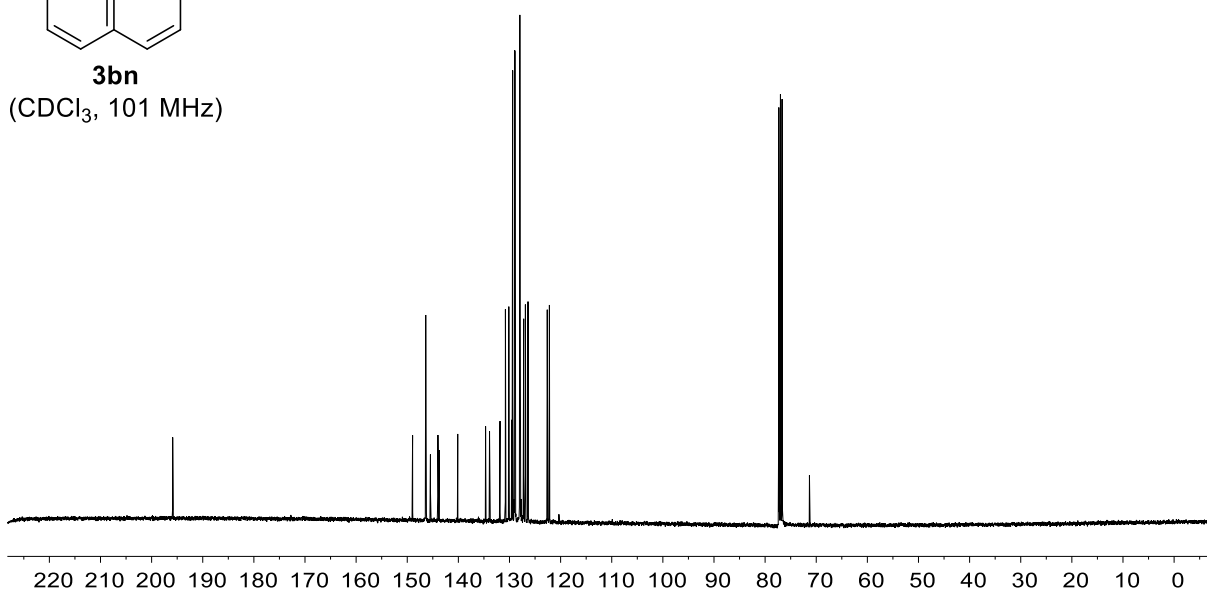

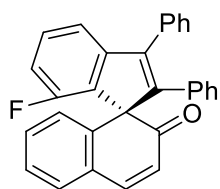

**3bo**  
(CDCl<sub>3</sub>, 300 MHz)

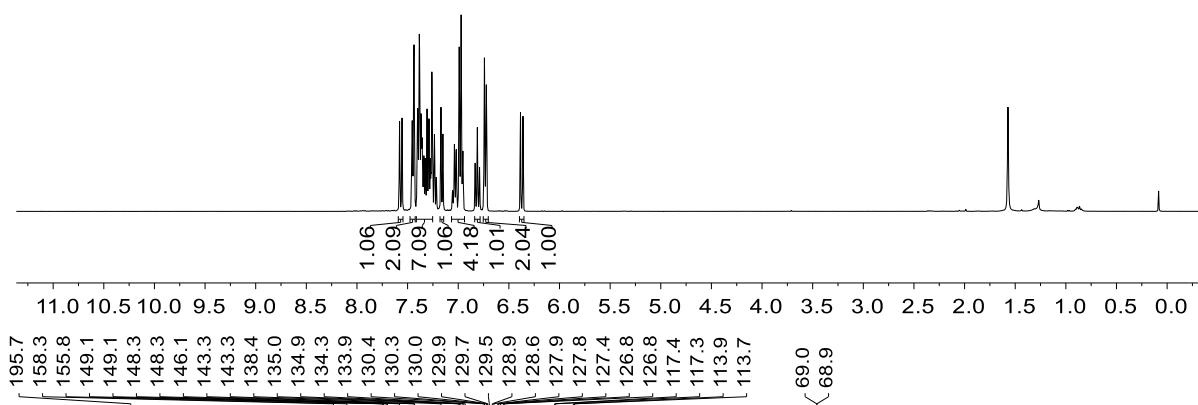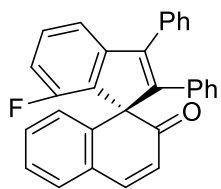

**3bo**  
(CDCl<sub>3</sub>, 101 MHz)

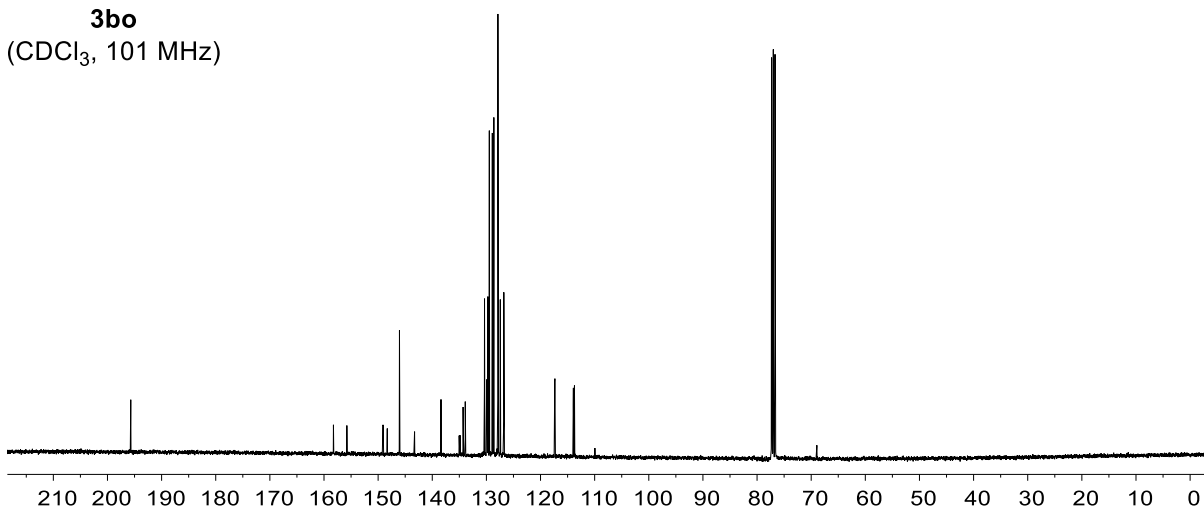

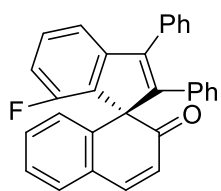

**3bo**  
(CDCl<sub>3</sub>, 377 MHz)

-119.5  
-119.6  
-119.6  
-119.6

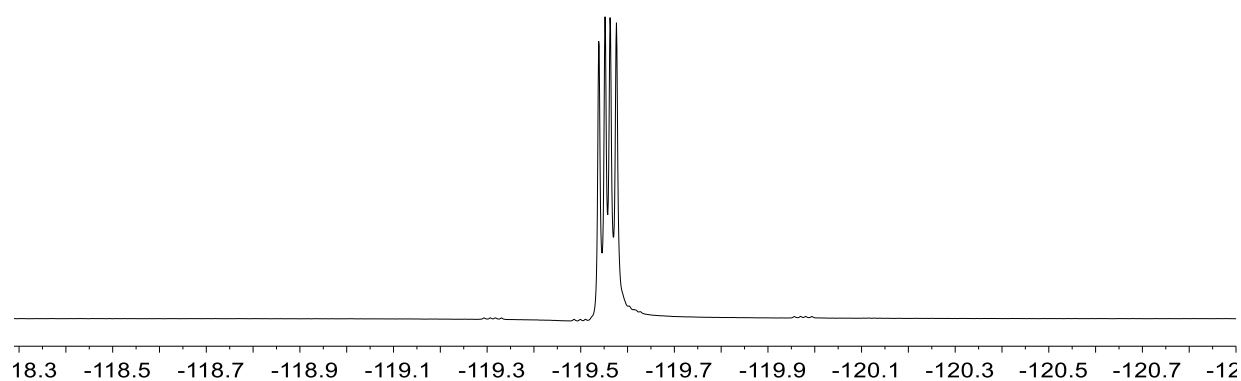

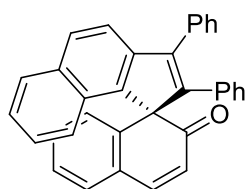

**3bp**  
(CDCl<sub>3</sub>, 300 MHz)

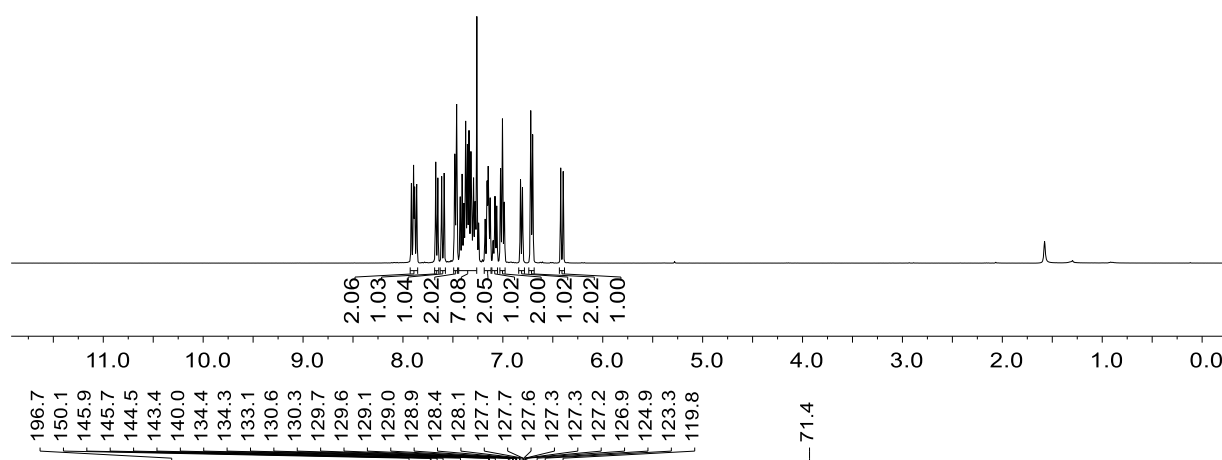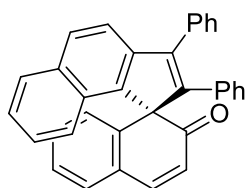

**3bp**  
(CDCl<sub>3</sub>, 101 MHz)

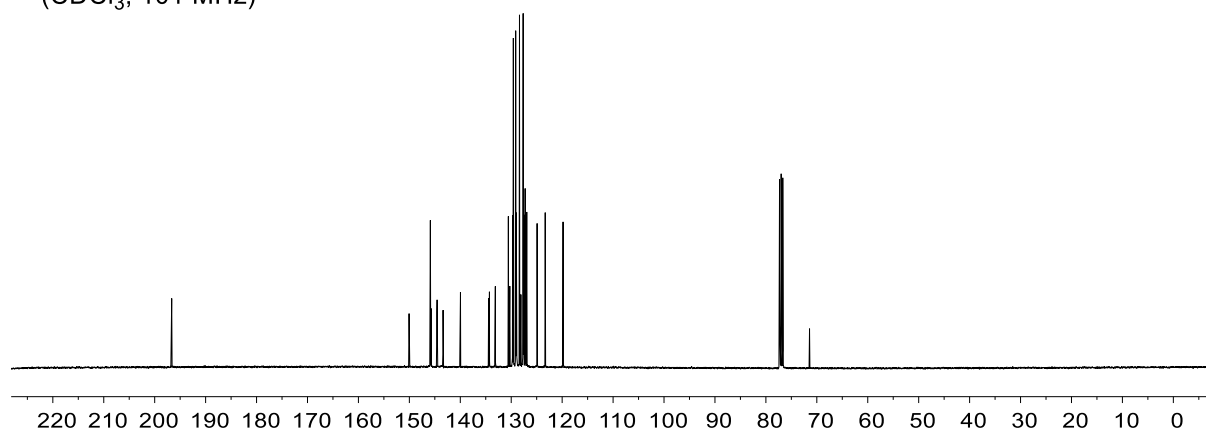

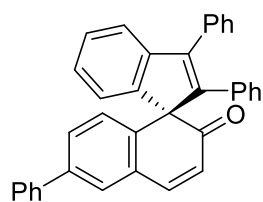

**3bq**  
(CDCl<sub>3</sub>, 300 MHz)

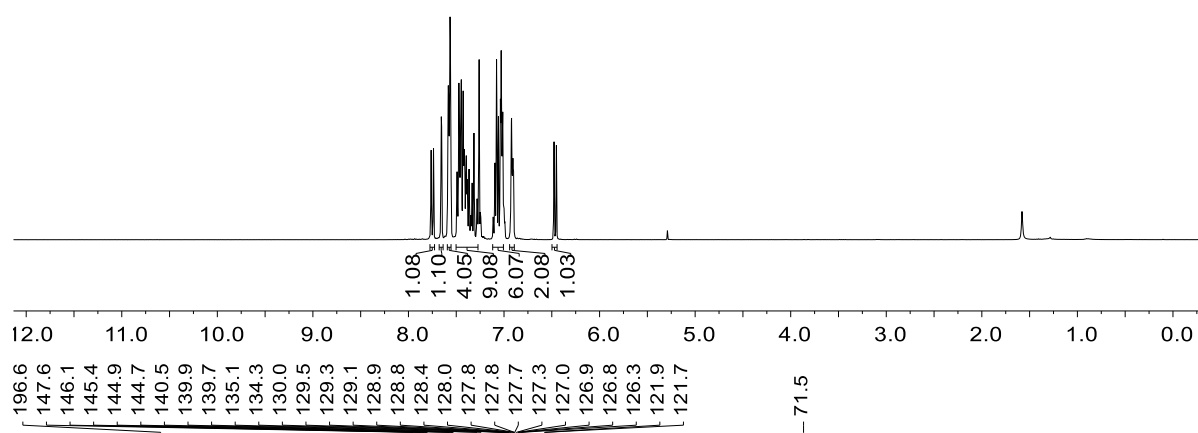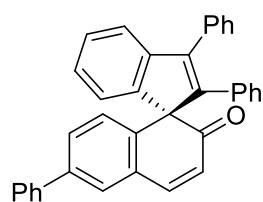

**3bq**  
(CDCl<sub>3</sub>, 101 MHz)

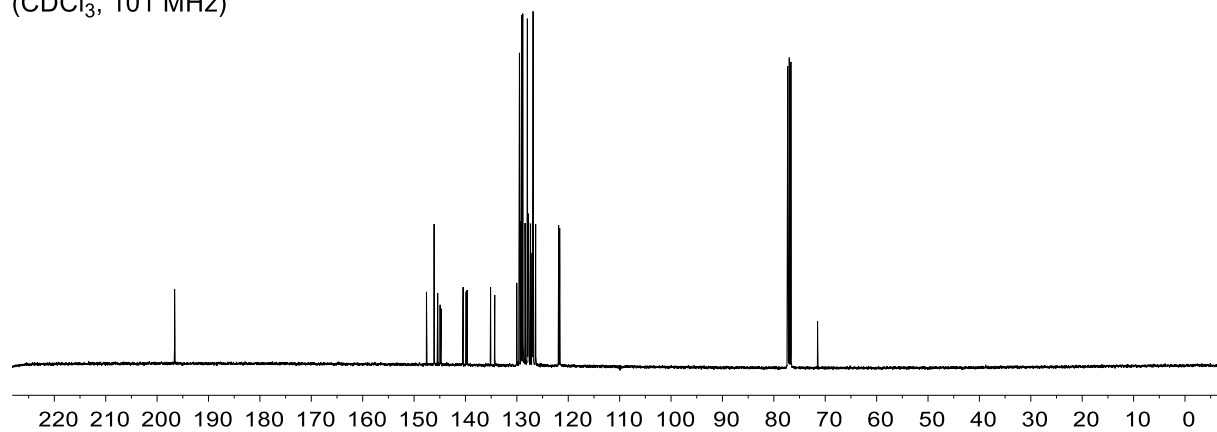

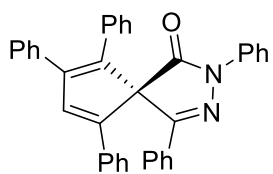

**4a**

(CDCl<sub>3</sub>, 300 MHz)

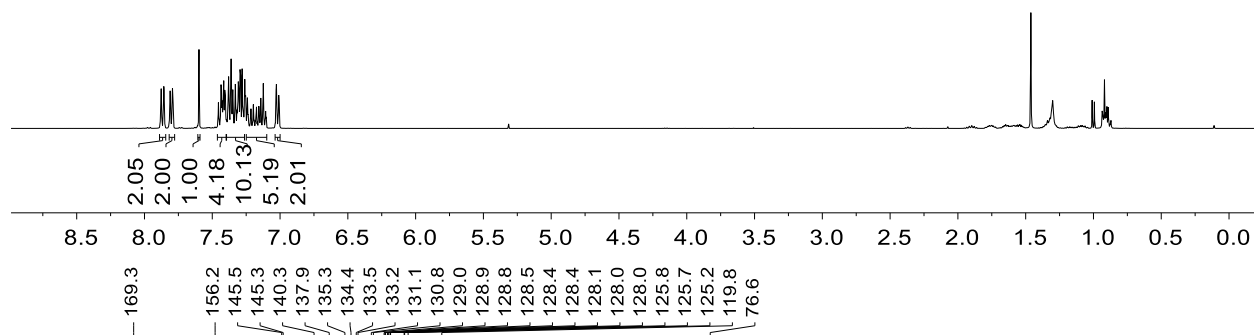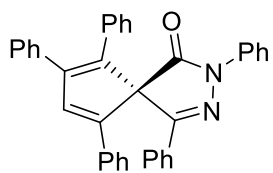

**4a**

(CDCl<sub>3</sub>, 101 MHz)

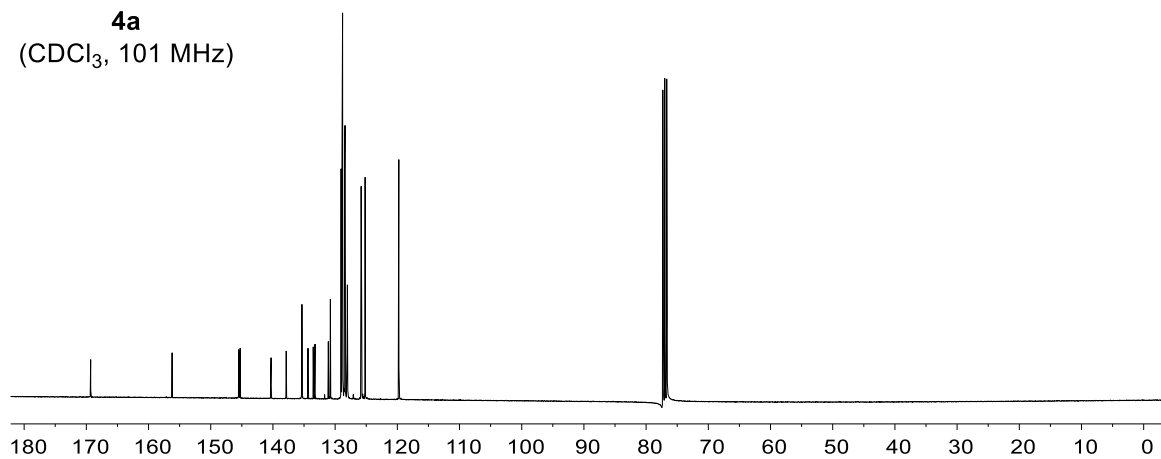

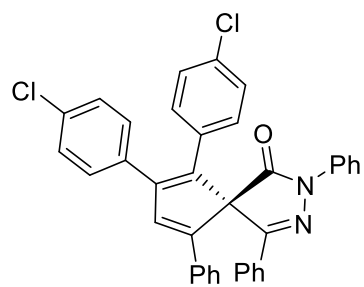

**4b**  
(CDCl<sub>3</sub>, 300 MHz)

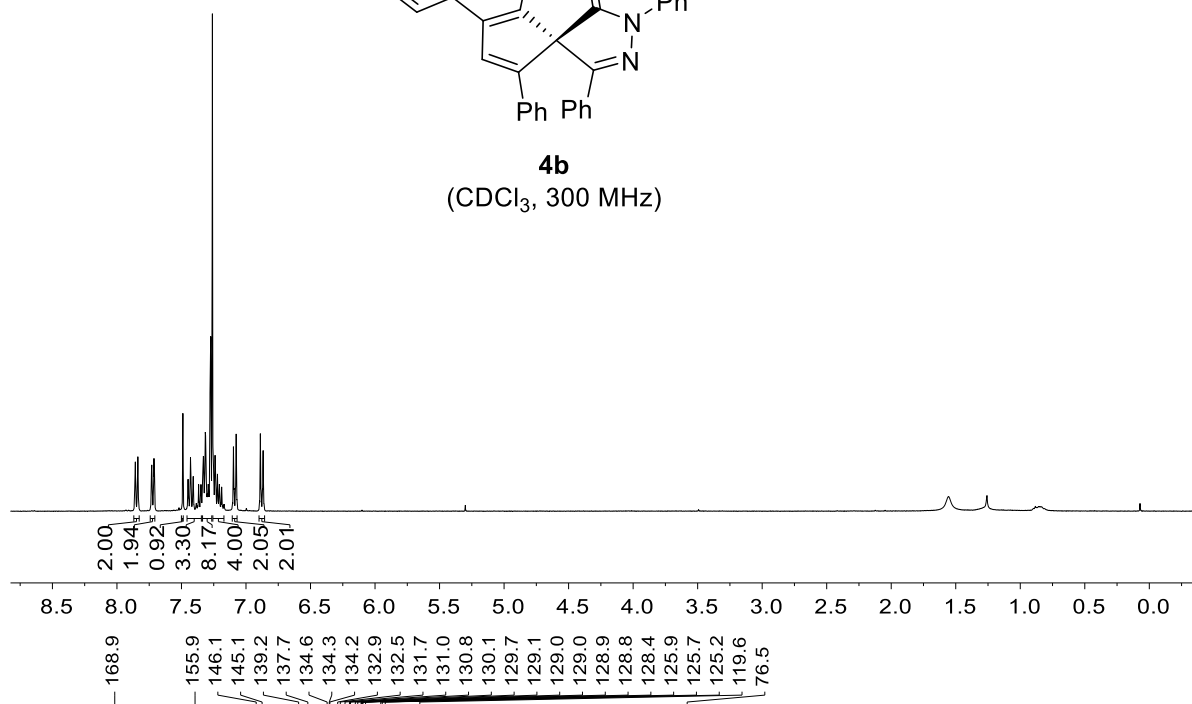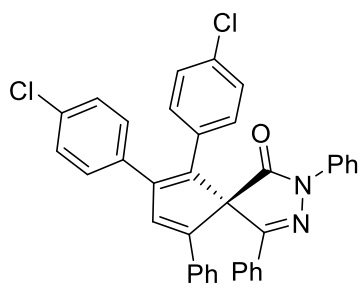

**4b**  
(CDCl<sub>3</sub>, 101 MHz)

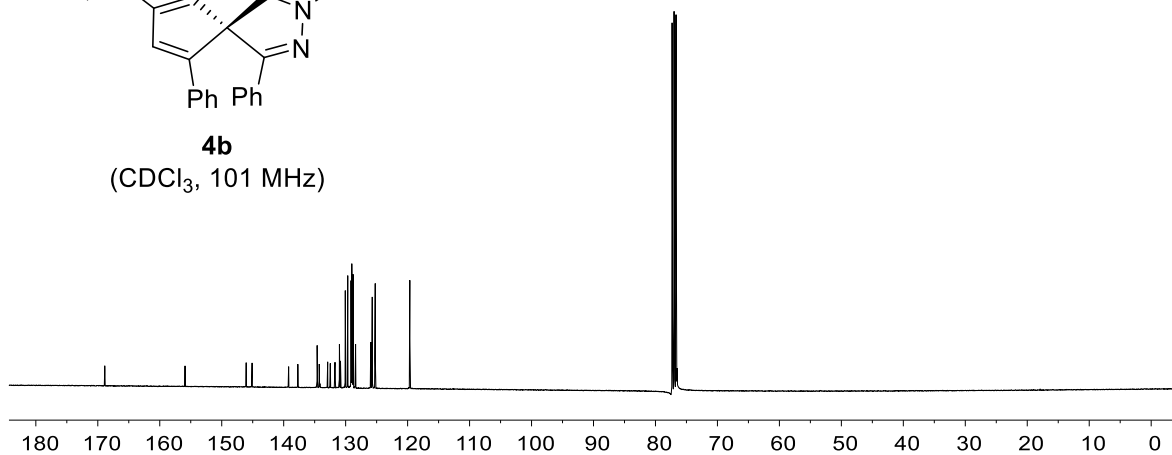

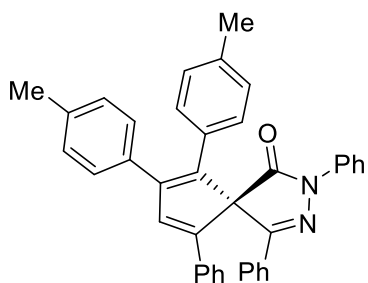

**4c**  
(CDCl<sub>3</sub>, 300 MHz)

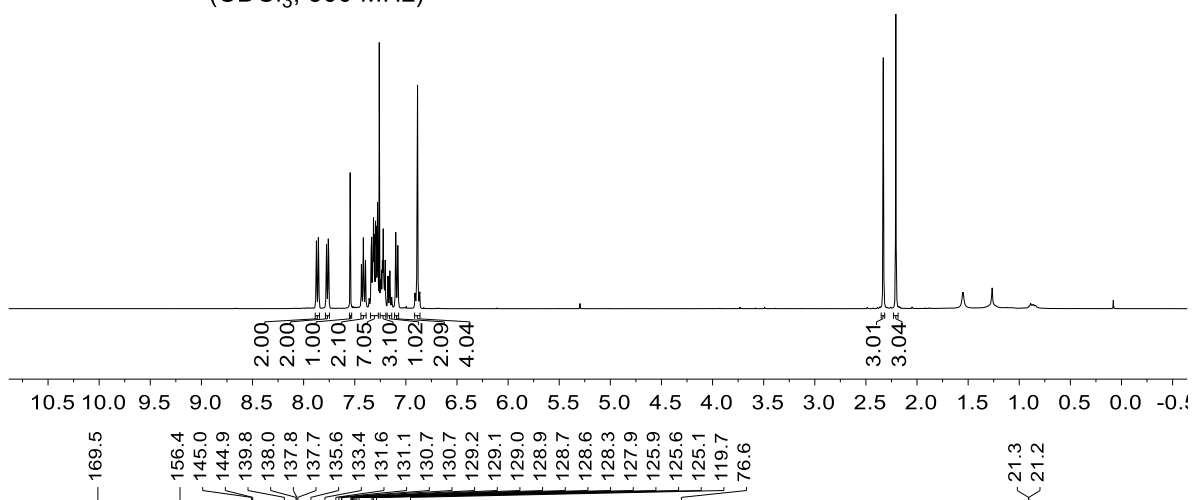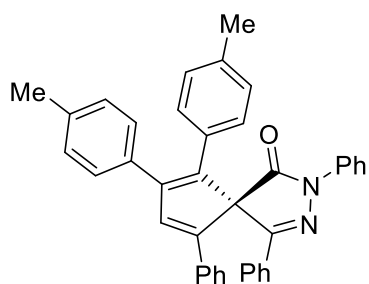

**4c**  
(CDCl<sub>3</sub>, 101 MHz)

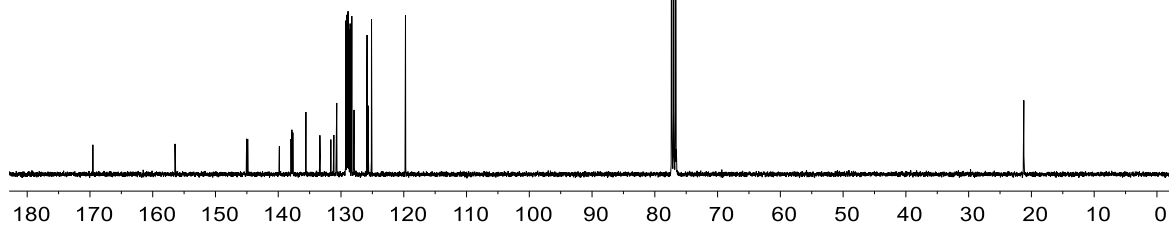



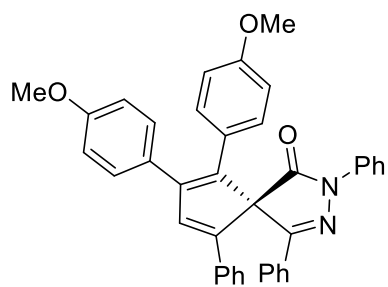

**4d**  
(CDCl<sub>3</sub>, 300 MHz)

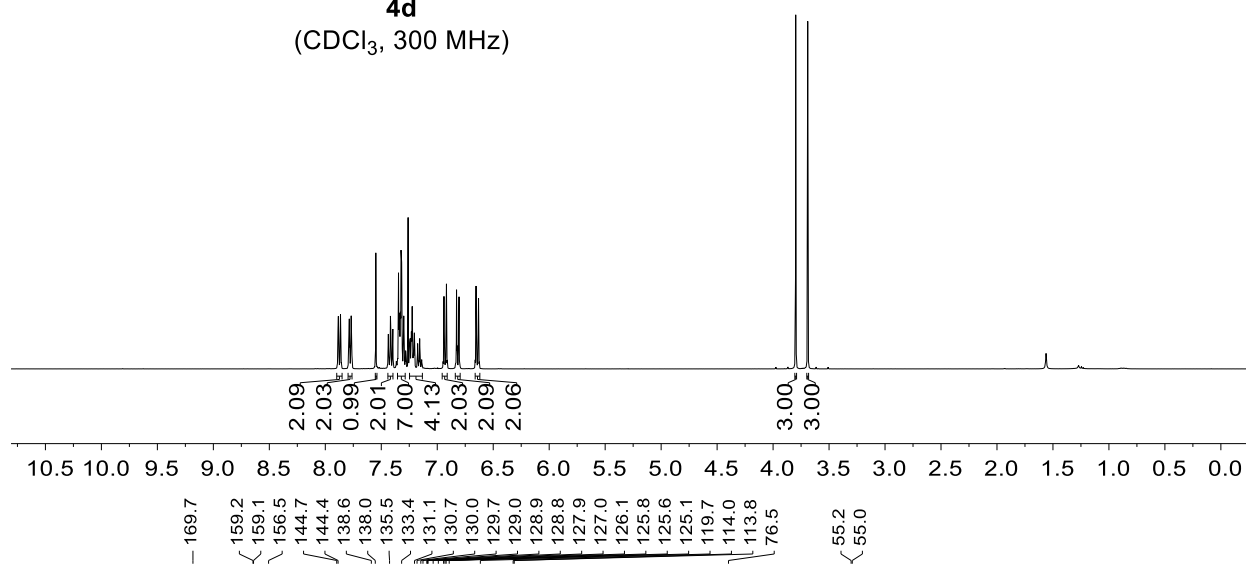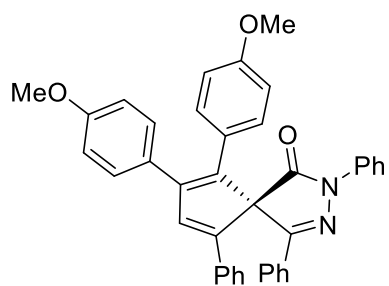

**4d**  
(CDCl<sub>3</sub>, 101 MHz)

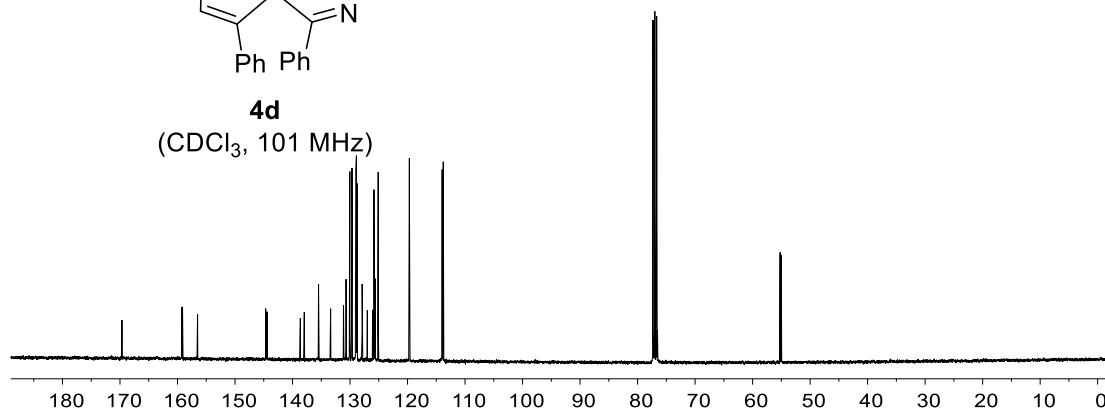

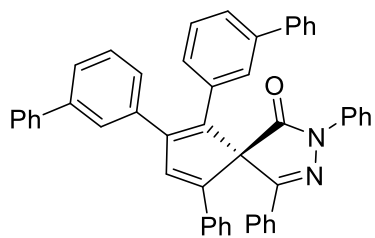

**4e**  
(CDCl<sub>3</sub>, 300 MHz)

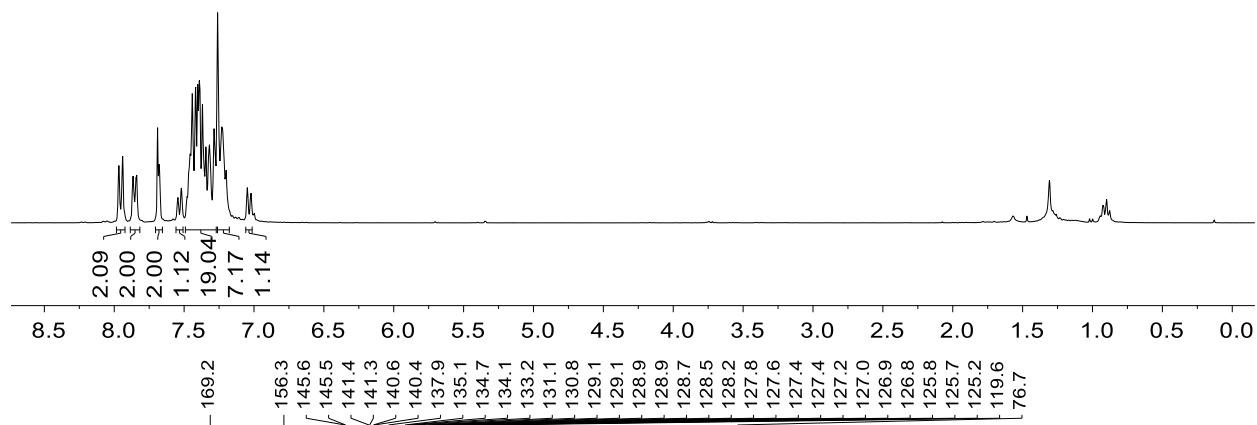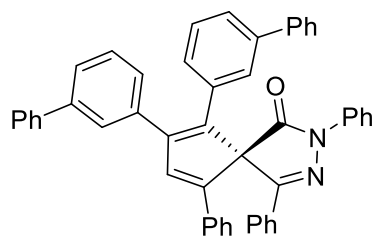

**4e**  
(CDCl<sub>3</sub>, 101 MHz)

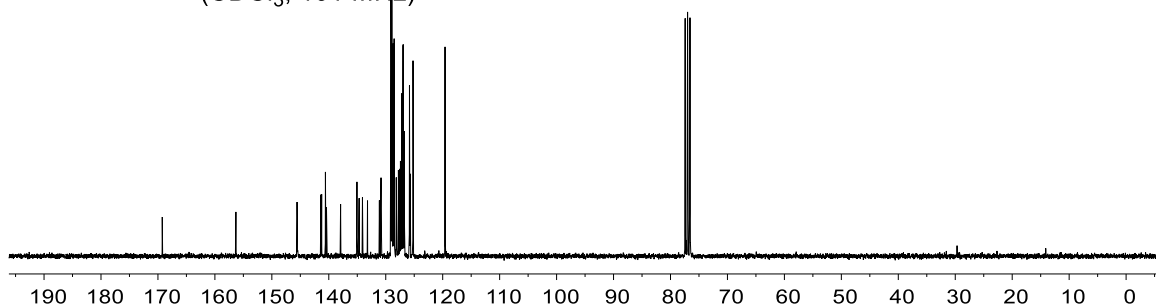

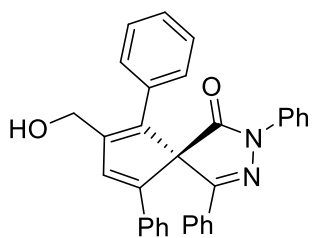

**4f**  
(CDCl<sub>3</sub>, 300 MHz)

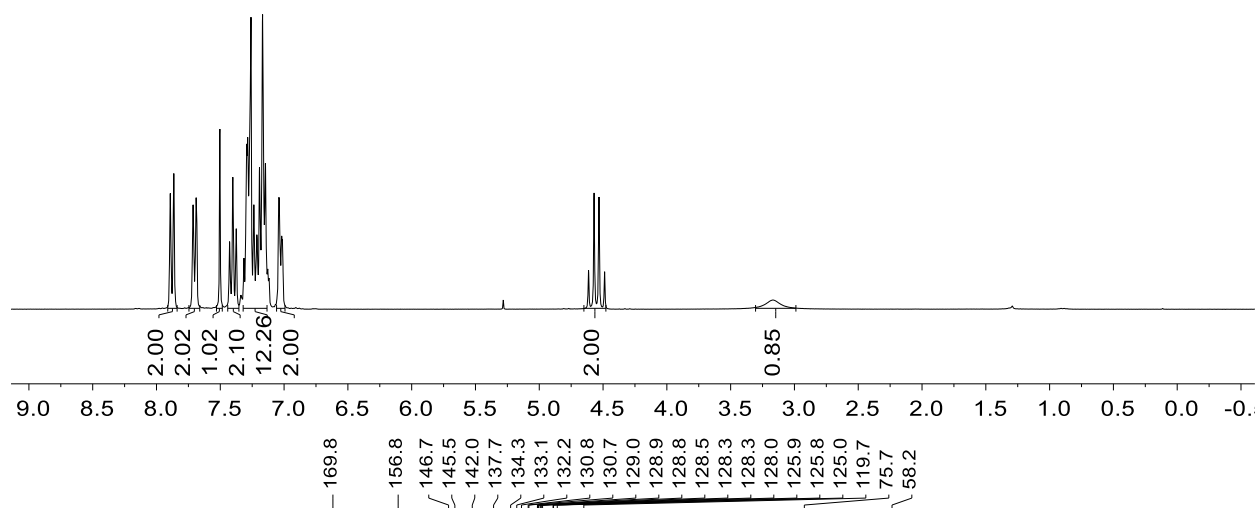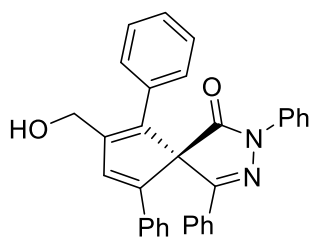

**4f**  
(CDCl<sub>3</sub>, 101 MHz)

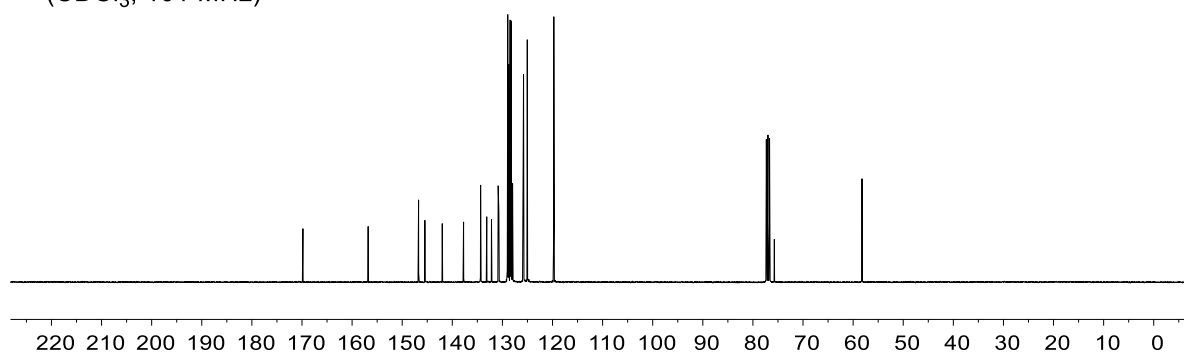

Supplement: d1sc07124f1.pdf [file d1sc07124f1.pdf]
